# Supplementary material for: Dietary influences on urinary tract infections: unraveling the gut microbiota connection
Source: Royal Society of Chemistry journal article supplement (doi:10.1039/d4fo03271c), 2024-01-01
Supplement: d4fo03271c2.xlsx [file d4fo03271c2.xlsx]

## Sheet: MR Dietary and biomarker result
Interference	Inverse Variance Weighted
	UKB		FINNGEN		Meta-analysis
	OR (95% CI)	P	OR (95% CI)	P	OR (95% CI)	P
Coffee intake	0.990（0.980-1.000）	0.059	0.695（0.412-1.174）	0.174	0.99 [0.98, 1.00]	0.19
Tea intake	1.000（0.994-1.004）	0.674	0.782（0.605-1.011）	0.061	1.00 [0.99, 1.01]	0.06
Alcohol intake frequency	1.004（1.001-1.007）	0.007	1.245（1.051-1.475）	0.011	1.00 [1.00, 1.01]	0.01
Cheese intake	0.993（0.987-0.998）	0.009	0.680（0.491-0.943）	0.021	0.99 [0.99, 1.00]	0.02
Poultry intake	1.015（0.990-1.041）	0.249	8.876(0.668-117.984)	0.098	1.11 [0.99, 1.24]	0.11
Pork intake	1.008（0.990-1.026）	0.386	3.407（1.275-9.105）	0.015	2.87 [1.15, 7.12]	0.36
Processed meat intake	0.993(0.984-1.002)	0.147	0.469(0.241-0.911)	0.025	0.99 [0.98, 1.00]	0.03
Oily fish intake	0.993（0.986-0.999）	0.017	0.662(0.451-0.970）	0.035	0.99 [0.99, 1.00]	0.04
Non-Oily fish intake	1.006（0.990-1.023）	0.434	2.160（0.366-12.752）	0.395	1.01 [0.99, 1.02]	0.4
Beef intake	0.987（0.970-1.004）	0.129	1.737(0.659-4.578)	0.264	0.99 [0.97, 1.00]	0.25
Mutton intake	0.984(0.971-0.996)	0.013	0.917(0.470-1.787)	0.799	0.98 [0.97, 1.00]	0.89
	Inverse Variance Weighted
Cheese intake	OR (95% CI)	P
C-Reactive protein level	0.810（0.671-0.978）	0.028
Neutrophil gelatinase-associated lipocalin	1.566（0.847-2.895）	0.152
Procalcitonin	0.529（0.286-0.978）	0.042
Interleukin-1-beta levels	0.528（0.309-0.904）	0.02
Interleukin-6 levels	0.665（0.474-0.934）	0.019
Interleukin-8 levels	0.796（0.596-1.062）	0.121
Elevated erythrocyte sedimentation rate and abnormality of plasma viscosity	0.521（0.185-1.464）	0.216
Myeloperoxidase levels	0.756（0.584-0.977）	0.033
Oily fish intake
C-Reactive protein level	0.738（0.557-0.977）	0.034
Neutrophil gelatinase-associated lipocalin	0.865(0.434-1.724)	0.68
Procalcitonin	0.662（0.284-1.539）	0.338
Interleukin-1-beta levels	1.044（0.590-1.849）	0.882
Interleukin-6 levels	0.584(0.360-0.945)	0.029
Interleukin-8 levels	0.780(0.521-1.170)	0.23
Elevated erythrocyte sedimentation rate and abnormality of plasma viscosity	0.962(0.305-3.033)	0.947
Myeloperoxidase levels	0.959(0.743-1.238)	0.75
Alcohol intake frequency
C-Reactive protein level	1.187(1.076-1.309)	0.0006
Neutrophil gelatinase-associated lipocalin	0.944(0.704-1.266)	0.701
Procalcitonin	1.113(0.784-1.579)	0.547
Interleukin-1-beta levels	0.813(0.590-1.122)	0.208
Interleukin-6 levels	1.002(0.853-1.178)	0.979
Interleukin-8 levels	0.996(0.869-1.142)	0.953
Elevated erythrocyte sedimentation rate and abnormality of plasma viscosity	1.576(0.844-2.942)	0.153
Myeloperoxidase levels	0.966(0.848-1.101)	0.608

## Sheet: MR Dietary & biomarker analysis
Interference	UKB										FINNGEN
	No. Of SNPs		Weighted Median		MR Egger		Pleiotropy		Heterogeneity		No. Of SNPs	Weighted Median		MR Egger		Pleiotropy		Heterogeneity
			OR (95% CI)	P	OR (95% CI)	P	Intercept	P	Q	P		OR (95% CI)	P	OR (95% CI)	P	Intercept	P	Q	P
Coffee intake	19		0.991（0.977-1.006）	0.236	1.015（0.948-1.088）	0.667	-0.000283428	0.478	14.78	0.677	23	0.734（0.365-1.475）	0.385	3.403（0.575-20.144）	0.191	-0.0199721	0.081	21.474	0.492
Tea intake	30		1.001（0.994-1.008）	0.752	0.998（0.988-1.008）	0.719	1.92829e-05	0.849	19.344	0.912	31	0.783（0.549-1.118）	0.178	0.561（0.328-0.959）	0.043	0.00767391	0.177	22.337	0.841
Alcohol intake frequency	51		1.005（1.000-1.010）	0.032	0.996（0.984-1.009）	0.574	0.00018607	0.215	49.509	0.493	52	1.125（0.868-1.458）	0.372	1.076（0.667-1.734）	0.766	0.00373824	0.524	47.221	0.625
Cheese intake	31		0.993（0.985-1.001）	0.099	1.005（0.981-1.030）	0.669	-0.000214764	0.298	26.944	0.626	33	0.846（0.532-1.344）	0.479	1.268（0.380-4.321）	0.702	-0.0110772	0.301	37.935	0.217
Poultry intake	3		1.014（0.985-1.044）	0.341	1.090（0.423-2.812）	0.887	-0.000779463	0.906	0.114	0.945	3	2.267(0.270-19.014)	0.451	7.194422e-27(2.876381e-56——1799.47344)	0.332	6.74382	0.034	6.74	0.034
Pork intake	8		1.007（0.985-1.030）	0.519	0.980（0.870-1.105）	0.755	0.000291323	0.662	1.687	0.975	8	4.538（1.256-16.399）	0.021	24.415（0.065-9193.516）	0.332	-0.0209859	0.534	4.189	0.758
Processed meat intake	13		0.993(0.980-1.005)	0.246	0.954(0.896-1.015)	0.165	0.000596048	0.226	10.325	0.587	13	0.390(0.181-0.838)	0.016	30.231(0.655-1396.329)0.109	0.109	-0.0617135	0.054	19.657	0.074
Oily fish intake	36		0.995（0.987-1.004）	0.287	1.003（0.973-1.034）	0.855	-0.000146254	0.502	39.359	0.281	35	0.792（0.484-1.295）	0.353	2.093（0.338-12.976）	0.433	-0.0163527	0.215	45.027	0.098
Non-Oily fish intake	6		1.007（0.987-1.028）	0.508	0.978（0.912-1.050）	0.577	0.000372769	0.465	1.71	0.888	6	1.132（0.283-4.530）	0.861	0.789（0.000-4951.968）0.960	0.96	0.0131402	0.828	18.688	0.002
Beef intake	7		0.978（0.958-1.000）	0.045	1.077（0.960-1.209）	0.262	-0.0010463	0.193	6.993	0.322	7	2.410(0.654-8.873)	0.186	3.103(0.012-832.995)	0.708	-0.00722313	0.844	5.302	0.506
mutton intake	17		0.982(0.965-1.000)	0.047	0.950(0.884-1.021)	0.181	0.000362553	0.35	18.431	0.299	19	0.917(0.373-2.259)	0.851	4.413(0.223-87.296)	0.343	-0.0170424	0.305	15.17	0.65
Cheese intake	No. Of SNPs		Weighted Median		MR Egger		Pleiotropy		Heterogeneity
			OR (95% CI)	P	OR (95% CI)	P	Intercept	P	Q	P
C-Reactive protein level	9		0.865（0.672-1.113）	0.26	0.815（0.319-2.079）	0.681	-8.28031e-05	0.991	6.652	0.575
Neutrophil gelatinase-associated lipocalin	32		1.348（0.565-3.216）	0.501	1.065（0.118-9.635）	0.956	0.0068853	0.723	27.706	0.636
Procalcitonin	32		0.680（0.277-1.670）	0.4	0.635（0.070-5.739）	0.688	-0.00324529	0.867	26.889	0.678
Interleukin-1-beta levels	23		0.697（0.330-1.470）	0.343	2.696（0.455-15.968）	0.287	-0.0295348	0.074	15.4	0.845
Interleukin-6 levels	29		0.831（0.514-1.342）	0.448	0.338（0.088-1.299）	0.125	0.011379	0.317	24.566	0.651
Interleukin-8 levels	31		0.909（0.600-1.377）	0.652	0.898（0.320-2.521）	0.839	-0.00216432	0.813	17.347	0.968
Elevated erythrocyte sedimentation rate and abnormality of plasma viscosity	33		0.653（0.147-2.894）	0.575	3.975（0.087-182.075）	0.485	-0.0361972	0.287	29.883	0.574
Myeloperoxidase levels	27		0.709（0.508-0.991）	0.044	0.790（0.306-2.041）	0.63	-0.000824429	0.925	11.977	0.991
Oily fish intake
C-Reactive protein level	12		0.786（0.601-1.027）	0.078	2.119（0.145-30.931)	0.595	-0.0135738	0.456	27.687	0.0036139
Neutrophil gelatinase-associated lipocalin	33		0.638(0.238-1.711)	0.372	0.745(0.017-33.222)	0.88	0.00204995	0.938	25.231	0.797
Procalcitonin	25		0.636（0.194-2.081）	0.454	0.091（0.000-55.737）	0.471	0.0257192	0.547	24.853	0.414
Interleukin-1-beta levels	27		0.912（0.423-1.967）	0.815	7.609（0.429-135.022）	0.179	-0.0277039	0.179	13.644	0.977
Interleukin-6 levels	21		0.453(0.233-0.881)	0.02	0.407(0.032-5.253)	0.499	0.00490546	0.781	23.603	0.26
Interleukin-8 levels	21		0.736(0.410-1.320)	0.303	0.441(0.054-3.595)	0.454	0.00777237	0.593	13.576	0.851
Elevated erythrocyte sedimentation rate and abnormality of plasma viscosity	35		1.313(0.247-6.981)	0.749	0.094(0.000-23.559)	0.407	0.0330403	0.405	33.505	0.492
Myeloperoxidase levels	36		0.942(0.661-1.342)	0.74	0.534(0.152-1.873)	0.334	0.00827723	0.357	21.728	0.961
Alcohol intake frequency
C-Reactive protein level	16		1.156(0.999-1.337)	0.051	1.565(0.775-3.158)	0.231	-0.00576225	0.448	14.315	0.502
Neutrophil gelatinase-associated lipocalin	53		1.072(0.656-1.752)	0.781	0.774(0.455-1.316)	0.348	0.00652203	0.382	53.286	0.424
Procalcitonin	51		0.975(0.579-1.644)	0.926	1.123(0.314-4.018)	0.859	-0.000203388	0.989	46.118	0.63
Interleukin-1-beta levels	47		0.837(0.537-1.303)	0.43	0.421(0.115-1.540)	0.198	0.0153445	0.31	60.741	0.071
Interleukin-6 levels	54		1.052(0.820-1.351)	0.69	1.097(0.816-1.476)	0.541	-0.00296819	0.476	61.96	0.187
Interleukin-8 levels	54		0.968(0.774-1.212)	0.778	0.946(0.737-1.214)	0.663	0.00168192	0.63	47.071	0.703
Elevated erythrocyte sedimentation rate and abnormality of plasma viscosity	48		1.436(0.599-3.440)	0.417	1.070(0.176-6.502)	0.941	0.00948994	0.656	32.11	0.952
Myeloperoxidase levels	53		0.908(0.746-1.105)	0.336	0.978(0.756-1.265)	0.865	-0.000362668	0.918	62.373	0.154

## Sheet: UTI & Dietary SNP
	pval.exposure	chr.exposure	pos.exposure	beta.exposure	se.exposure	samplesize.exposure	id.exposure	SNP	effect_allele.exposure	other_allele.exposure	eaf.exposure	exposure
1	4e-09	1	4569436	0.0198033	0.00336454	462346	ukb-b-5779	rs780569	A	T	0.70882	Alcohol intake frequency. || id:ukb-b-5779
2	3.40001e-09	1	940096	0.0181476	0.00307049	462346	ukb-b-5779	rs4503294	T	C	0.565333	Alcohol intake frequency. || id:ukb-b-5779
3	7.69999e-09	1	51218695	0.0178107	0.00308461	462346	ukb-b-5779	rs28787109	A	G	0.40423	Alcohol intake frequency. || id:ukb-b-5779
4	3.79997e-09	1	216681000	-0.018378	0.00311907	462346	ukb-b-5779	rs2244598	C	T	0.605114	Alcohol intake frequency. || id:ukb-b-5779
5	2.69998e-09	1	35363679	-0.0188379	0.00316516	462346	ukb-b-5779	rs4417025	A	G	0.361153	Alcohol intake frequency. || id:ukb-b-5779
6	4.60002e-08	1	94051350	0.0196672	0.00359788	462346	ukb-b-5779	rs7514579	C	A	0.232457	Alcohol intake frequency. || id:ukb-b-5779
7	4.30031e-11	2	97797680	0.0296116	0.00449182	462346	ukb-b-5779	rs13390019	C	T	0.134041	Alcohol intake frequency. || id:ukb-b-5779
8	7.19946e-11	2	215402926	-0.0197869	0.00303605	462346	ukb-b-5779	rs10188314	T	C	0.470852	Alcohol intake frequency. || id:ukb-b-5779
9	1.29999e-08	2	74226102	0.0250636	0.00440325	462346	ukb-b-5779	rs4241258	T	C	0.13763	Alcohol intake frequency. || id:ukb-b-5779
10	3.40001e-08	2	2220795	-0.0231352	0.00419154	462346	ukb-b-5779	rs72769229	T	A	0.154942	Alcohol intake frequency. || id:ukb-b-5779
11	3.40001e-08	2	193989223	0.0301348	0.00546031	462346	ukb-b-5779	rs17662759	C	T	0.089115	Alcohol intake frequency. || id:ukb-b-5779
12	9.09913e-13	2	45139779	-0.0217406	0.00304345	462346	ukb-b-5779	rs473098	T	C	0.557689	Alcohol intake frequency. || id:ukb-b-5779
13	3.80014e-12	3	49029468	0.0464269	0.00668673	462346	ukb-b-5779	rs76082653	T	C	0.054327	Alcohol intake frequency. || id:ukb-b-5779
14	1.40001e-08	3	68408109	-0.017207	0.00303483	462346	ukb-b-5779	rs262240	T	C	0.468553	Alcohol intake frequency. || id:ukb-b-5779
15	7.70016e-15	3	71579022	-0.023864	0.00307022	462346	ukb-b-5779	rs7610856	A	C	0.429053	Alcohol intake frequency. || id:ukb-b-5779
16	4.90004e-09	3	174213976	0.0182303	0.00311635	462346	ukb-b-5779	rs1515591	G	T	0.383186	Alcohol intake frequency. || id:ukb-b-5779
17	3.2e-08	4	55088093	-0.0186203	0.00336834	462346	ukb-b-5779	rs28622224	T	C	0.280364	Alcohol intake frequency. || id:ukb-b-5779
18	1e-44	4	39414993	-0.0437138	0.00311609	462346	ukb-b-5779	rs11940694	G	A	0.604193	Alcohol intake frequency. || id:ukb-b-5779
19	1.39959e-178	4	100239319	-0.261708	0.00918496	462346	ukb-b-5779	rs1229984	C	T	0.97277	Alcohol intake frequency. || id:ukb-b-5779
20	4.90004e-10	4	135900688	-0.0194072	0.00311875	462346	ukb-b-5779	rs13102973	C	T	0.61881	Alcohol intake frequency. || id:ukb-b-5779
21	9.8992e-22	4	100290815	-0.0485216	0.00506585	462346	ukb-b-5779	rs62305780	G	C	0.102253	Alcohol intake frequency. || id:ukb-b-5779
22	3.79997e-08	5	145615275	-0.0186516	0.00338983	462346	ukb-b-5779	rs13178443	T	C	0.276349	Alcohol intake frequency. || id:ukb-b-5779
23	3.79997e-08	5	166830787	-0.020493	0.00372613	462346	ukb-b-5779	rs11750777	A	G	0.209454	Alcohol intake frequency. || id:ukb-b-5779
24	1.10002e-14	5	87854395	0.0239479	0.00309951	462346	ukb-b-5779	rs4916723	C	A	0.420617	Alcohol intake frequency. || id:ukb-b-5779
25	2.69998e-10	5	144136931	-0.0191888	0.00303977	462346	ukb-b-5779	rs461599	C	A	0.462259	Alcohol intake frequency. || id:ukb-b-5779
26	3.50002e-10	6	12903957	-0.0193455	0.00308215	462346	ukb-b-5779	rs9349379	G	A	0.405493	Alcohol intake frequency. || id:ukb-b-5779
27	4.60002e-10	7	153486704	-0.0191155	0.0030674	462346	ukb-b-5779	rs2622167	A	G	0.428653	Alcohol intake frequency. || id:ukb-b-5779
28	3.09999e-08	7	99872071	0.020627	0.00372774	462346	ukb-b-5779	rs6943160	C	T	0.208646	Alcohol intake frequency. || id:ukb-b-5779
29	2.29985e-12	7	141668403	0.0217614	0.00310188	462346	ukb-b-5779	rs4726481	T	G	0.400576	Alcohol intake frequency. || id:ukb-b-5779
30	4.60002e-08	8	87214346	-0.0226831	0.00415058	462346	ukb-b-5779	rs34440851	T	C	0.157151	Alcohol intake frequency. || id:ukb-b-5779
31	1.7e-08	8	141539923	-0.0259222	0.00459853	462346	ukb-b-5779	rs2977454	G	C	0.124072	Alcohol intake frequency. || id:ukb-b-5779
32	2.5e-08	9	16287769	-0.0320735	0.00575757	462346	ukb-b-5779	rs74679146	C	T	0.074515	Alcohol intake frequency. || id:ukb-b-5779
33	6.19998e-09	10	133761285	-0.0203615	0.00350346	462346	ukb-b-5779	rs34473884	A	G	0.24819	Alcohol intake frequency. || id:ukb-b-5779
34	9.90011e-09	11	82688356	0.0174322	0.00304065	462346	ukb-b-5779	rs10792669	G	A	0.505254	Alcohol intake frequency. || id:ukb-b-5779
35	2.29985e-11	11	133780757	0.0250908	0.00375381	462346	ukb-b-5779	rs11223617	A	G	0.206155	Alcohol intake frequency. || id:ukb-b-5779
36	2e-08	11	58394154	0.022401	0.00398884	462346	ukb-b-5779	rs550942	T	C	0.823865	Alcohol intake frequency. || id:ukb-b-5779
37	6.69993e-09	11	121801129	0.0179674	0.00309866	462346	ukb-b-5779	rs1666658	C	T	0.392206	Alcohol intake frequency. || id:ukb-b-5779
38	2.5e-08	13	68080817	0.0168979	0.00303207	462346	ukb-b-5779	rs1937522	G	A	0.528054	Alcohol intake frequency. || id:ukb-b-5779
39	3.69999e-10	13	49971400	-0.0213301	0.0034046	462346	ukb-b-5779	rs7330939	T	C	0.720352	Alcohol intake frequency. || id:ukb-b-5779
40	2.69998e-09	14	73523162	-0.0188476	0.00316849	462346	ukb-b-5779	rs2535911	T	C	0.354749	Alcohol intake frequency. || id:ukb-b-5779
41	4e-09	14	59072226	0.0179489	0.00305071	462346	ukb-b-5779	rs186347	T	G	0.463343	Alcohol intake frequency. || id:ukb-b-5779
42	1.40001e-09	15	76508632	-0.0393728	0.00649583	462346	ukb-b-5779	rs80292319	C	T	0.057704	Alcohol intake frequency. || id:ukb-b-5779
43	3.09999e-09	15	34659517	-0.0196704	0.00331968	462346	ukb-b-5779	rs117799466	C	G	0.336989	Alcohol intake frequency. || id:ukb-b-5779
44	6.4003e-12	16	72105844	-0.0281947	0.00410324	462346	ukb-b-5779	rs72787062	A	G	0.162767	Alcohol intake frequency. || id:ukb-b-5779
45	1.7e-08	16	73912588	0.0174212	0.00308849	462346	ukb-b-5779	rs1104608	C	G	0.426338	Alcohol intake frequency. || id:ukb-b-5779
46	1.79999e-08	16	51205819	0.0228752	0.00406259	462346	ukb-b-5779	rs728538	G	T	0.168868	Alcohol intake frequency. || id:ukb-b-5779
47	1.89998e-09	17	7615745	0.0237883	0.00396178	462346	ukb-b-5779	rs9906502	A	G	0.176998	Alcohol intake frequency. || id:ukb-b-5779
48	2.69998e-10	17	27588806	0.0247806	0.00392537	462346	ukb-b-5779	rs8614	A	C	0.182509	Alcohol intake frequency. || id:ukb-b-5779
49	9.69996e-09	17	29735752	0.0205894	0.00358993	462346	ukb-b-5779	rs9912298	C	A	0.239585	Alcohol intake frequency. || id:ukb-b-5779
50	7.59976e-22	18	21080859	-0.029326	0.00305313	462346	ukb-b-5779	rs1893659	A	C	0.459939	Alcohol intake frequency. || id:ukb-b-5779
51	1.40001e-08	18	22639237	0.0202641	0.00357005	462346	ukb-b-5779	rs5022348	T	C	0.40703	Alcohol intake frequency. || id:ukb-b-5779
52	1.6e-09	18	38313195	0.0261133	0.0043272	462346	ukb-b-5779	rs2043677	T	C	0.145599	Alcohol intake frequency. || id:ukb-b-5779
53	5.89997e-09	18	38269812	0.0248553	0.00427092	462346	ukb-b-5779	rs9958320	C	T	0.153147	Alcohol intake frequency. || id:ukb-b-5779
54	6.89922e-11	18	50843233	0.0200024	0.00306682	462346	ukb-b-5779	rs62097995	A	T	0.423591	Alcohol intake frequency. || id:ukb-b-5779
55	2.39999e-09	20	35554361	-0.019529	0.00327075	462346	ukb-b-5779	rs6030200	A	G	0.31415	Alcohol intake frequency. || id:ukb-b-5779
56	1.2e-08	21	34270051	-0.029795	0.00523292	462346	ukb-b-5779	rs11700855	G	A	0.093465	Alcohol intake frequency. || id:ukb-b-5779
57	3.59998e-08	22	24828853	-0.0704589	0.0127906	462346	ukb-b-5779	rs71651683	T	C	0.0142	Alcohol intake frequency. || id:ukb-b-5779
58	9.80009e-09	1	97743702	-0.0102001	0.00177865	461053	ukb-b-2862	rs11165829	G	C	0.35997	Beef intake || id:ukb-b-2862
59	1.29999e-09	1	205308591	-0.0113754	0.00187563	461053	ukb-b-2862	rs1105388	T	C	0.300147	Beef intake || id:ukb-b-2862
60	1.5e-08	2	33866464	-0.0122159	0.00215779	461053	ukb-b-2862	rs1470610	C	G	0.196185	Beef intake || id:ukb-b-2862
61	2.39999e-08	2	147946069	-0.00968628	0.00173523	461053	ukb-b-2862	rs62169335	T	C	0.543241	Beef intake || id:ukb-b-2862
62	9.60064e-15	3	71034748	0.0133533	0.00172438	461053	ukb-b-2862	rs4676964	T	C	0.510605	Beef intake || id:ukb-b-2862
63	2.39999e-08	7	97819047	0.00954846	0.00171063	461053	ukb-b-2862	rs7791463	A	G	0.534781	Beef intake || id:ukb-b-2862
64	3.40001e-08	8	10126532	-0.0280593	0.00508482	461053	ukb-b-2862	rs79809011	A	G	0.029465	Beef intake || id:ukb-b-2862
65	1.5e-09	9	11526198	-0.0126658	0.00209611	461053	ukb-b-2862	rs10959890	C	T	0.212297	Beef intake || id:ukb-b-2862
66	1.7e-09	18	53412903	-0.0103387	0.00171651	461053	ukb-b-2862	rs784251	T	C	0.477649	Beef intake || id:ukb-b-2862
67	4.60002e-08	19	42588999	0.0150187	0.00274812	461053	ukb-b-2862	rs11878917	A	G	0.109688	Beef intake || id:ukb-b-2862
68	4.20001e-08	1	98546134	0.0186266	0.00339704	451486	ukb-b-1489	rs2802530	A	G	0.876502	Cheese intake || id:ukb-b-1489
69	4.79999e-08	1	154295592	-0.0131886	0.00241592	451486	ukb-b-1489	rs6685323	T	C	0.309293	Cheese intake || id:ukb-b-1489
70	4.39997e-08	2	58433375	0.0160073	0.00292518	451486	ukb-b-1489	rs12475594	G	A	0.178459	Cheese intake || id:ukb-b-1489
71	1e-31	2	45154689	0.0274418	0.00234182	451486	ukb-b-1489	rs504675	T	C	0.352634	Cheese intake || id:ukb-b-1489
72	3.89996e-10	2	166299635	0.0163749	0.00261651	451486	ukb-b-1489	rs1514755	G	A	0.239596	Cheese intake || id:ukb-b-1489
73	2.39999e-09	3	161549397	0.0196018	0.00328458	451486	ukb-b-1489	rs79184944	A	T	0.134346	Cheese intake || id:ukb-b-1489
74	1.2e-08	3	36915814	0.0130245	0.00228781	451486	ukb-b-1489	rs4296548	G	T	0.609594	Cheese intake || id:ukb-b-1489
75	9.80009e-09	3	107637010	-0.0474668	0.00827804	451486	ukb-b-1489	rs77742462	G	A	0.020525	Cheese intake || id:ukb-b-1489
76	2.5e-08	3	194803510	0.0316294	0.00567262	451486	ukb-b-1489	rs6774906	C	A	0.040653	Cheese intake || id:ukb-b-1489
77	2.90001e-08	3	56704919	-0.0124361	0.00224121	451486	ukb-b-1489	rs4681981	A	C	0.469086	Cheese intake || id:ukb-b-1489
78	2.19999e-08	4	61251106	0.0243652	0.00435152	451486	ukb-b-1489	rs4860341	C	T	0.928742	Cheese intake || id:ukb-b-1489
79	1.29999e-08	4	170228542	0.0147298	0.00258904	451486	ukb-b-1489	rs4692708	C	A	0.252659	Cheese intake || id:ukb-b-1489
80	2.39999e-08	5	87985295	-0.0128007	0.00229427	451486	ukb-b-1489	rs26579	C	G	0.586217	Cheese intake || id:ukb-b-1489
81	3.89996e-08	5	153597288	-0.0124766	0.00227073	451486	ukb-b-1489	rs6873324	C	A	0.425802	Cheese intake || id:ukb-b-1489
82	2.49977e-13	6	19028788	0.0212756	0.00290699	451486	ukb-b-1489	rs975303	G	A	0.181313	Cheese intake || id:ukb-b-1489
83	1.6e-08	6	62630863	0.0126363	0.00223591	451486	ukb-b-1489	rs1931805	C	T	0.500062	Cheese intake || id:ukb-b-1489
84	1.29999e-09	7	140144414	0.0151797	0.00249985	451486	ukb-b-1489	rs113367286	T	C	0.278467	Cheese intake || id:ukb-b-1489
85	4.49997e-10	7	2203808	-0.0167006	0.00267855	451486	ukb-b-1489	rs34198643	T	C	0.224165	Cheese intake || id:ukb-b-1489
86	8.99995e-09	7	115461436	-0.0137634	0.00239456	451486	ukb-b-1489	rs12672200	A	G	0.325794	Cheese intake || id:ukb-b-1489
87	1.40001e-09	7	132526871	-0.0146166	0.00241153	451486	ukb-b-1489	rs9649582	T	A	0.317256	Cheese intake || id:ukb-b-1489
88	5.30005e-10	9	88029000	0.0213573	0.0034399	451486	ukb-b-1489	rs3911016	G	T	0.120938	Cheese intake || id:ukb-b-1489
89	2.39999e-08	10	106766879	0.0277726	0.00497824	451486	ukb-b-1489	rs73335955	C	T	0.05334	Cheese intake || id:ukb-b-1489
90	1.09999e-09	11	7946480	0.0165432	0.00271432	451486	ukb-b-1489	rs67238148	T	G	0.217471	Cheese intake || id:ukb-b-1489
91	4.00037e-11	11	124942269	0.0325373	0.00492718	451486	ukb-b-1489	rs73024305	C	G	0.054789	Cheese intake || id:ukb-b-1489
92	2.39999e-08	12	371786	-0.0142421	0.00255161	451486	ukb-b-1489	rs524468	G	A	0.260633	Cheese intake || id:ukb-b-1489
93	1.29999e-08	12	107291383	-0.0128634	0.00226242	451486	ukb-b-1489	rs1024853	G	C	0.437902	Cheese intake || id:ukb-b-1489
94	1.09999e-08	12	22322789	-0.013175	0.00230588	451486	ukb-b-1489	rs7298331	C	A	0.604531	Cheese intake || id:ukb-b-1489
95	1.5e-08	12	121456616	0.0145932	0.00257996	451486	ukb-b-1489	rs61953351	T	G	0.250366	Cheese intake || id:ukb-b-1489
96	6.70039e-12	13	58715219	0.015728	0.00229156	451486	ukb-b-1489	rs1073242	A	G	0.553825	Cheese intake || id:ukb-b-1489
97	1.79999e-08	14	30122409	-0.0128806	0.00228956	451486	ukb-b-1489	rs17115145	T	C	0.401282	Cheese intake || id:ukb-b-1489
98	1.5e-09	15	83481880	0.0163794	0.00270974	451486	ukb-b-1489	rs35270670	G	A	0.217962	Cheese intake || id:ukb-b-1489
99	6.80002e-09	16	7744180	0.0197476	0.00340698	451486	ukb-b-1489	rs12447542	A	G	0.12558	Cheese intake || id:ukb-b-1489
100	2.19999e-10	16	1252369	0.016654	0.00262279	451486	ukb-b-1489	rs61734410	T	C	0.255213	Cheese intake || id:ukb-b-1489
101	9.49992e-09	18	44829435	0.0129646	0.00225868	451486	ukb-b-1489	rs1434511	T	C	0.455286	Cheese intake || id:ukb-b-1489
102	4.40048e-17	20	35528475	-0.0202495	0.00241026	451486	ukb-b-1489	rs1291145	C	T	0.685848	Cheese intake || id:ukb-b-1489
103	1.10002e-11	22	41992169	0.0247617	0.00364674	451486	ukb-b-1489	rs62236533	A	G	0.108791	Cheese intake || id:ukb-b-1489
104	4.19952e-11	1	96274668	0.0122025	0.00184972	428860	ukb-b-5237	rs4615895	A	G	0.740926	Coffee intake || id:ukb-b-5237
105	2.80001e-08	2	49368391	0.01035	0.00186429	428860	ukb-b-5237	rs12989746	T	G	0.249928	Coffee intake || id:ukb-b-5237
106	1.7e-08	2	62780440	-0.0133431	0.00236585	428860	ukb-b-5237	rs1527961	C	T	0.1349	Coffee intake || id:ukb-b-5237
107	2e-08	4	17424930	0.00985502	0.00175623	428860	ukb-b-5237	rs2597805	T	C	0.682463	Coffee intake || id:ukb-b-5237
108	2.39994e-11	5	7391462	-0.0113972	0.00170562	428860	ukb-b-5237	rs12514566	A	G	0.337107	Coffee intake || id:ukb-b-5237
109	5.00035e-11	7	17570479	-0.0160639	0.00244429	428860	ukb-b-5237	rs73075167	T	A	0.12918	Coffee intake || id:ukb-b-5237
110	4e-08	7	32930597	0.00913864	0.00166468	428860	ukb-b-5237	rs7811609	T	C	0.374746	Coffee intake || id:ukb-b-5237
111	1.89998e-08	8	110443480	-0.00915347	0.00162895	428860	ukb-b-5237	rs6469262	C	T	0.564966	Coffee intake || id:ukb-b-5237
112	3.89996e-09	8	33790200	-0.0254259	0.00431659	428860	ukb-b-5237	rs78267637	G	C	0.038115	Coffee intake || id:ukb-b-5237
113	1.89998e-09	8	109128653	-0.0111372	0.00185374	428860	ukb-b-5237	rs442355	C	G	0.254435	Coffee intake || id:ukb-b-5237
114	1e-08	9	27953724	-0.00939786	0.00164159	428860	ukb-b-5237	rs10119174	C	G	0.571035	Coffee intake || id:ukb-b-5237
115	6.19998e-09	10	135315795	0.0359086	0.00617871	428860	ukb-b-5237	rs117810762	A	G	0.017881	Coffee intake || id:ukb-b-5237
116	1.29987e-11	12	11316437	-0.0147305	0.00217536	428860	ukb-b-5237	rs61928609	C	A	0.835328	Coffee intake || id:ukb-b-5237
117	1.89998e-08	15	75174251	-0.0310299	0.00551601	428860	ukb-b-5237	rs117968677	A	G	0.024207	Coffee intake || id:ukb-b-5237
118	1.29999e-09	16	70927078	0.0105333	0.00173692	428860	ukb-b-5237	rs8056750	T	C	0.359129	Coffee intake || id:ukb-b-5237
119	4.09996e-08	17	46155786	-0.0103075	0.00187872	428860	ukb-b-5237	rs62064918	T	C	0.244545	Coffee intake || id:ukb-b-5237
120	8.60003e-09	17	60150383	0.0128864	0.00223845	428860	ukb-b-5237	rs57918684	A	G	0.154747	Coffee intake || id:ukb-b-5237
121	2.29985e-11	18	40950954	-0.0113533	0.00169853	428860	ukb-b-5237	rs630194	C	T	0.343374	Coffee intake || id:ukb-b-5237
122	3.79997e-08	18	55032486	-0.00890339	0.00161917	428860	ukb-b-5237	rs1942965	C	T	0.504585	Coffee intake || id:ukb-b-5237
123	8.9002e-15	19	41353107	0.0126667	0.00163351	428860	ukb-b-5237	rs56113850	C	T	0.578109	Coffee intake || id:ukb-b-5237
124	4.49997e-10	20	45840459	0.0104106	0.00166919	428860	ukb-b-5237	rs6063085	C	A	0.373473	Coffee intake || id:ukb-b-5237
125	2.5e-10	20	62891820	0.0103704	0.00163929	428860	ukb-b-5237	rs6062682	T	C	0.464546	Coffee intake || id:ukb-b-5237
126	4.30002e-09	22	41215672	-0.0107777	0.00183597	428860	ukb-b-5237	rs13054099	C	T	0.261004	Coffee intake || id:ukb-b-5237
127	3.29989e-11	22	24870527	-0.0451683	0.00680848	428860	ukb-b-5237	rs17842490	G	A	0.014248	Coffee intake || id:ukb-b-5237
128	6.80002e-10	1	6866978	-0.00903233	0.001464	460006	ukb-b-14179	rs660880	A	G	0.51281	Lamb/mutton intake || id:ukb-b-14179
129	3.2e-08	1	243582753	-0.0137749	0.00249124	460006	ukb-b-14179	rs56394517	G	A	0.09584	Lamb/mutton intake || id:ukb-b-14179
130	1.79999e-09	2	56662691	0.0188989	0.00314007	460006	ukb-b-14179	rs139237013	A	G	0.057668	Lamb/mutton intake || id:ukb-b-14179
131	2.80001e-08	2	151345113	-0.00909294	0.00163727	460006	ukb-b-14179	rs2222760	A	G	0.28089	Lamb/mutton intake || id:ukb-b-14179
132	7.69999e-09	3	83786985	-0.00852476	0.00147636	460006	ukb-b-14179	rs2140714	G	C	0.557738	Lamb/mutton intake || id:ukb-b-14179
133	2.80001e-09	3	175671450	-0.010087	0.00169718	460006	ukb-b-14179	rs12634740	G	T	0.252078	Lamb/mutton intake || id:ukb-b-14179
134	1.2e-08	4	93984155	0.008401	0.00147406	460006	ukb-b-14179	rs6829572	A	G	0.456717	Lamb/mutton intake || id:ukb-b-14179
135	2.69998e-08	5	33951693	-0.0242681	0.00436437	460006	ukb-b-14179	rs16891982	G	C	0.972143	Lamb/mutton intake || id:ukb-b-14179
136	2.69998e-09	5	88065637	-0.00884199	0.00148593	460006	ukb-b-14179	rs11743441	T	G	0.574343	Lamb/mutton intake || id:ukb-b-14179
137	4e-09	6	37669616	0.0129151	0.00219431	460006	ukb-b-14179	rs62398404	T	C	0.127211	Lamb/mutton intake || id:ukb-b-14179
138	5.30005e-09	9	131936055	0.00910131	0.00155908	460006	ukb-b-14179	rs1556147	T	A	0.671626	Lamb/mutton intake || id:ukb-b-14179
139	3.69999e-09	11	31097262	0.0158208	0.00268204	460006	ukb-b-14179	rs673696	T	C	0.080995	Lamb/mutton intake || id:ukb-b-14179
140	2.80027e-12	11	126590934	0.013811	0.00197586	460006	ukb-b-14179	rs4489752	T	G	0.836007	Lamb/mutton intake || id:ukb-b-14179
141	4e-08	12	60473007	0.0100199	0.00182433	460006	ukb-b-14179	rs6581296	G	C	0.794714	Lamb/mutton intake || id:ukb-b-14179
142	1.80011e-12	13	55946152	-0.0116241	0.00164854	460006	ukb-b-14179	rs3105056	C	T	0.732738	Lamb/mutton intake || id:ukb-b-14179
143	3.2e-08	14	98872110	-0.00894391	0.00161749	460006	ukb-b-14179	rs1958801	G	A	0.287998	Lamb/mutton intake || id:ukb-b-14179
144	4.70002e-11	16	5694999	-0.0114181	0.0017352	460006	ukb-b-14179	rs55813438	A	G	0.763165	Lamb/mutton intake || id:ukb-b-14179
145	4.39997e-08	16	64293179	0.00811121	0.00148179	460006	ukb-b-14179	rs2926119	A	C	0.569417	Lamb/mutton intake || id:ukb-b-14179
146	4.30002e-08	19	42670527	0.0126533	0.00230897	460006	ukb-b-14179	rs17270057	C	T	0.113347	Lamb/mutton intake || id:ukb-b-14179
147	2.90001e-10	22	27253353	0.00953241	0.00151227	460006	ukb-b-14179	rs136548	T	C	0.376668	Lamb/mutton intake || id:ukb-b-14179
148	1.40001e-09	2	144147475	0.0116344	0.00191996	460880	ukb-b-17627	rs16822430	C	T	0.23321	Non-oily fish intake || id:ukb-b-17627
149	1.40001e-09	2	208205711	0.0122842	0.00202829	460880	ukb-b-17627	rs11680516	C	T	0.202388	Non-oily fish intake || id:ukb-b-17627
150	1e-09	6	69996217	-0.0107346	0.00175764	460880	ukb-b-17627	rs3799077	G	T	0.309993	Non-oily fish intake || id:ukb-b-17627
151	2.80001e-08	7	25517103	0.00906029	0.0016312	460880	ukb-b-17627	rs17317920	G	A	0.479238	Non-oily fish intake || id:ukb-b-17627
152	3.59998e-12	12	110057250	-0.0177401	0.00255244	460880	ukb-b-17627	rs35287743	T	G	0.11583	Non-oily fish intake || id:ukb-b-17627
153	4.70002e-22	19	49259529	0.016184	0.00167625	460880	ukb-b-17627	rs838133	G	A	0.549409	Non-oily fish intake || id:ukb-b-17627
154	3.69999e-12	1	204596454	0.0156803	0.00225713	460443	ukb-b-2209	rs45501495	T	C	0.236013	Oily fish intake || id:ukb-b-2209
155	2.90001e-08	2	49039237	-0.0170539	0.00307567	460443	ukb-b-2209	rs55930451	T	C	0.108001	Oily fish intake || id:ukb-b-2209
156	6.59994e-09	2	77224951	0.0129737	0.00223629	460443	ukb-b-2209	rs55985303	A	G	0.241079	Oily fish intake || id:ukb-b-2209
157	3.50002e-10	2	59488019	-0.0120492	0.0019207	460443	ukb-b-2209	rs17050031	T	C	0.4801	Oily fish intake || id:ukb-b-2209
158	8e-09	2	145967878	0.0121188	0.00210096	460443	ukb-b-2209	rs275160	C	T	0.700597	Oily fish intake || id:ukb-b-2209
159	5.00035e-15	3	71534763	0.0151162	0.00193122	460443	ukb-b-2209	rs1876245	C	T	0.431482	Oily fish intake || id:ukb-b-2209
160	8.49963e-14	3	167184878	0.0147781	0.00198025	460443	ukb-b-2209	rs9841174	C	T	0.373913	Oily fish intake || id:ukb-b-2209
161	4.39997e-08	3	176822676	-0.0107265	0.0019595	460443	ukb-b-2209	rs1201289	G	T	0.394525	Oily fish intake || id:ukb-b-2209
162	1.5e-08	5	166811498	-0.0108521	0.00191598	460443	ukb-b-2209	rs10061973	T	G	0.5139	Oily fish intake || id:ukb-b-2209
163	1.09999e-08	6	88103149	0.012772	0.00223239	460443	ukb-b-2209	rs12663865	A	G	0.758185	Oily fish intake || id:ukb-b-2209
164	3.10027e-13	6	155847549	0.0140098	0.00192207	460443	ukb-b-2209	rs4869859	C	T	0.449939	Oily fish intake || id:ukb-b-2209
165	2.49977e-14	7	121947456	0.0176735	0.00231943	460443	ukb-b-2209	rs11767283	G	A	0.221709	Oily fish intake || id:ukb-b-2209
166	2.69998e-10	7	95760694	-0.0123535	0.00195628	460443	ukb-b-2209	rs6465487	G	A	0.399814	Oily fish intake || id:ukb-b-2209
167	1.09999e-09	9	106772283	-0.0116474	0.00191252	460443	ukb-b-2209	rs552234	A	G	0.495449	Oily fish intake || id:ukb-b-2209
168	1.7e-08	10	80939219	0.0111218	0.00197362	460443	ukb-b-2209	rs703987	C	G	0.615005	Oily fish intake || id:ukb-b-2209
169	9.30037e-11	11	79217391	0.0125555	0.00193806	460443	ukb-b-2209	rs4278546	G	A	0.441085	Oily fish intake || id:ukb-b-2209
170	4.90004e-09	11	83187113	-0.0114437	0.00195609	460443	ukb-b-2209	rs2374424	G	A	0.601525	Oily fish intake || id:ukb-b-2209
171	6.00067e-13	11	111452040	-0.0151398	0.00210253	460443	ukb-b-2209	rs631490	C	G	0.709106	Oily fish intake || id:ukb-b-2209
172	1.09999e-08	13	59412819	-0.0127449	0.00223046	460443	ukb-b-2209	rs9597870	G	T	0.245844	Oily fish intake || id:ukb-b-2209
173	1.9002e-24	13	55975115	-0.0220014	0.00215651	460443	ukb-b-2209	rs3124402	G	A	0.733261	Oily fish intake || id:ukb-b-2209
174	2e-10	13	101252635	-0.0122298	0.00192275	460443	ukb-b-2209	rs12855717	T	C	0.526774	Oily fish intake || id:ukb-b-2209
175	1.7e-08	13	54220229	0.0149567	0.00265295	460443	ukb-b-2209	rs1361016	G	T	0.844853	Oily fish intake || id:ukb-b-2209
176	8.10009e-09	13	93477312	-0.0157428	0.00273045	460443	ukb-b-2209	rs9301837	A	C	0.143273	Oily fish intake || id:ukb-b-2209
177	3.50002e-08	14	23650191	0.0108608	0.00196936	460443	ukb-b-2209	rs4982738	A	G	0.582899	Oily fish intake || id:ukb-b-2209
178	2.5e-08	14	100279492	-0.0109641	0.00196607	460443	ukb-b-2209	rs12896749	C	G	0.384721	Oily fish intake || id:ukb-b-2209
179	2.80027e-14	15	47867762	0.0146421	0.00192478	460443	ukb-b-2209	rs28533540	A	G	0.534203	Oily fish intake || id:ukb-b-2209
180	9.3994e-25	16	83683945	0.0225669	0.00219679	460443	ukb-b-2209	rs11859365	C	A	0.253765	Oily fish intake || id:ukb-b-2209
181	2.80027e-11	16	51495068	-0.0133201	0.0020015	460443	ukb-b-2209	rs9889161	T	G	0.357929	Oily fish intake || id:ukb-b-2209
182	1.5e-08	18	35156177	-0.0129784	0.00229212	460443	ukb-b-2209	rs7243428	G	A	0.224648	Oily fish intake || id:ukb-b-2209
183	4.70002e-10	18	53431951	-0.0162522	0.00260966	460443	ukb-b-2209	rs59355765	T	C	0.160079	Oily fish intake || id:ukb-b-2209
184	4.30002e-08	19	22212505	-0.0106304	0.00194012	460443	ukb-b-2209	rs7254235	G	A	0.577254	Oily fish intake || id:ukb-b-2209
185	1.6e-08	19	37438329	-0.0159106	0.0028148	460443	ukb-b-2209	rs75887709	G	A	0.13588	Oily fish intake || id:ukb-b-2209
186	1.7e-08	20	12495731	0.0124683	0.00220977	460443	ukb-b-2209	rs6033437	A	C	0.257329	Oily fish intake || id:ukb-b-2209
187	1.79999e-09	20	61154107	-0.011542	0.0019184	460443	ukb-b-2209	rs6089753	T	C	0.530967	Oily fish intake || id:ukb-b-2209
188	3.2e-08	21	23340050	0.0107114	0.00193719	460443	ukb-b-2209	rs2827161	G	T	0.422842	Oily fish intake || id:ukb-b-2209
189	2.70023e-14	22	31750013	0.0169856	0.00223087	460443	ukb-b-2209	rs9606833	C	T	0.243593	Oily fish intake || id:ukb-b-2209
190	1.40001e-08	1	45962409	-0.00995273	0.00175408	460162	ukb-b-5640	rs11211124	C	T	0.230603	Pork intake || id:ukb-b-5640
191	1e-08	2	155751852	0.0110847	0.00193678	460162	ukb-b-5640	rs9973426	G	A	0.176598	Pork intake || id:ukb-b-5640
192	2.19999e-09	5	115641827	-0.0104266	0.00174217	460162	ukb-b-5640	rs254152	G	C	0.23498	Pork intake || id:ukb-b-5640
193	9.59997e-09	10	125127645	0.0115919	0.0020206	460162	ukb-b-5640	rs34161520	G	C	0.160381	Pork intake || id:ukb-b-5640
194	4.09996e-08	12	38446861	-0.0150846	0.00274837	460162	ukb-b-5640	rs2387807	T	C	0.077893	Pork intake || id:ukb-b-5640
195	1.6e-09	16	74166991	-0.00895091	0.00148347	460162	ukb-b-5640	rs3964074	C	T	0.546932	Pork intake || id:ukb-b-5640
196	2.1e-08	18	74196202	0.00840935	0.00150083	460162	ukb-b-5640	rs36124222	C	T	0.433239	Pork intake || id:ukb-b-5640
197	8.99912e-13	19	49259529	0.0108944	0.00152491	460162	ukb-b-5640	rs838133	G	A	0.549354	Pork intake || id:ukb-b-5640
198	1.7e-08	15	78894339	-0.0108759	0.00192936	461900	ukb-b-8006	rs1051730	A	G	0.331381	Poultry intake || id:ukb-b-8006
199	1.6e-08	16	6163838	0.0105123	0.00185899	461900	ukb-b-8006	rs9923768	A	G	0.59853	Poultry intake || id:ukb-b-8006
200	4.70002e-08	20	50999841	0.0112177	0.00205323	461900	ukb-b-8006	rs2426440	G	A	0.732602	Poultry intake || id:ukb-b-8006
201	1.09999e-08	2	107197420	0.0120489	0.00210698	461981	ukb-b-6324	rs11894162	T	C	0.547464	Processed meat intake || id:ukb-b-6324
202	3.59998e-08	2	173306140	-0.0149895	0.00271965	461981	ukb-b-6324	rs3762621	T	C	0.183451	Processed meat intake || id:ukb-b-6324
203	2.5e-10	3	18227421	0.0132887	0.00209967	461981	ukb-b-6324	rs9809856	G	A	0.475881	Processed meat intake || id:ukb-b-6324
204	1.6e-10	3	81888255	0.0139958	0.00218986	461981	ukb-b-6324	rs2873054	C	A	0.353276	Processed meat intake || id:ukb-b-6324
205	2.1e-08	3	62560523	0.0121871	0.00217408	461981	ukb-b-6324	rs6786550	C	T	0.635043	Processed meat intake || id:ukb-b-6324
206	1.79999e-08	3	25276416	-0.0127603	0.00226606	461981	ukb-b-6324	rs6765179	A	G	0.309968	Processed meat intake || id:ukb-b-6324
207	6.69993e-09	5	52800358	-0.0199599	0.00344207	461981	ukb-b-6324	rs10454812	C	A	0.103032	Processed meat intake || id:ukb-b-6324
208	9.49992e-09	7	113901132	-0.0140142	0.00244137	461981	ukb-b-6324	rs6961970	A	C	0.244698	Processed meat intake || id:ukb-b-6324
209	4.40048e-11	11	31424823	0.0154728	0.0023479	461981	ukb-b-6324	rs6484504	C	T	0.72462	Processed meat intake || id:ukb-b-6324
210	2.1e-09	11	33800533	-0.0133229	0.00222295	461981	ukb-b-6324	rs11032380	T	A	0.333352	Processed meat intake || id:ukb-b-6324
211	1.29999e-08	15	93424341	0.0164667	0.00289872	461981	ukb-b-6324	rs4778053	G	C	0.843808	Processed meat intake || id:ukb-b-6324
212	4.70002e-08	18	34800257	-0.0145937	0.00267084	461981	ukb-b-6324	rs8096167	C	T	0.1926	Processed meat intake || id:ukb-b-6324
213	1.59993e-18	19	49259529	0.0190137	0.00216555	461981	ukb-b-6324	rs838133	G	A	0.549369	Processed meat intake || id:ukb-b-6324
214	4.30031e-13	1	174189269	-0.0157568	0.0021747	447485	ukb-b-6066	rs56188862	C	T	0.387454	Tea intake || id:ukb-b-6066
215	2.90001e-09	2	58515375	-0.015454	0.00260325	447485	ukb-b-6066	rs1156588	G	A	0.210071	Tea intake || id:ukb-b-6066
216	1.89998e-08	3	50239803	0.0191505	0.00340563	447485	ukb-b-6066	rs57462170	A	G	0.108773	Tea intake || id:ukb-b-6066
217	1.7e-09	3	89525505	0.0129948	0.0021557	447485	ukb-b-6066	rs2117137	G	A	0.405148	Tea intake || id:ukb-b-6066
218	5.30029e-15	4	89039082	-0.0262435	0.00335608	447485	ukb-b-6066	rs1481012	G	A	0.112209	Tea intake || id:ukb-b-6066
219	4.30002e-08	5	60465365	0.0117117	0.0021375	447485	ukb-b-6066	rs34619	A	G	0.430905	Tea intake || id:ukb-b-6066
220	7.00003e-13	5	152031650	-0.0171147	0.00238353	447485	ukb-b-6066	rs72797284	G	A	0.270797	Tea intake || id:ukb-b-6066
221	3.09999e-08	6	137222671	-0.0118039	0.00213302	447485	ukb-b-6066	rs7757102	G	A	0.555426	Tea intake || id:ukb-b-6066
222	1.09999e-08	6	137095269	-0.0719337	0.0125823	447485	ukb-b-6066	rs149805207	G	A	0.008538	Tea intake || id:ukb-b-6066
223	3.40017e-76	7	17284577	0.0405506	0.00219507	447485	ukb-b-6066	rs4410790	C	T	0.631224	Tea intake || id:ukb-b-6066
224	1.59993e-22	7	75616105	0.0230655	0.00236195	447485	ukb-b-6066	rs17685	A	G	0.277512	Tea intake || id:ukb-b-6066
225	2.19999e-09	7	17558580	0.0407321	0.00681204	447485	ukb-b-6066	rs141071726	A	G	0.026713	Tea intake || id:ukb-b-6066
226	1.09999e-08	7	39293033	0.0125013	0.00218542	447485	ukb-b-6066	rs9648476	A	G	0.622954	Tea intake || id:ukb-b-6066
227	5.19996e-10	7	141673345	0.0133969	0.00215659	447485	ukb-b-6066	rs713598	G	C	0.402254	Tea intake || id:ukb-b-6066
228	7.90005e-09	8	22088975	-0.0135837	0.00235432	447485	ukb-b-6066	rs13282783	T	C	0.285899	Tea intake || id:ukb-b-6066
229	6.1e-09	9	7054124	0.0158824	0.00273191	447485	ukb-b-6066	rs56348300	G	C	0.184619	Tea intake || id:ukb-b-6066
230	1.89998e-08	10	129152608	-0.0121906	0.00216898	447485	ukb-b-6066	rs10764990	A	G	0.607155	Tea intake || id:ukb-b-6066
231	1.29999e-09	10	12692902	-0.0128727	0.00211975	447485	ukb-b-6066	rs10752269	A	G	0.506082	Tea intake || id:ukb-b-6066
232	1.6e-08	10	86850616	0.0129023	0.0022823	447485	ukb-b-6066	rs2351187	A	G	0.318935	Tea intake || id:ukb-b-6066
233	2e-08	11	1679769	-0.0146481	0.00260905	447485	ukb-b-6066	rs17245213	A	G	0.208046	Tea intake || id:ukb-b-6066
234	7.89951e-12	11	16286183	0.0150037	0.00219355	447485	ukb-b-6066	rs10741694	C	T	0.627915	Tea intake || id:ukb-b-6066
235	2.99999e-09	11	59192089	-0.0133414	0.00224973	447485	ukb-b-6066	rs1453548	A	T	0.664929	Tea intake || id:ukb-b-6066
236	2.39994e-14	12	11284772	0.0217813	0.00285559	447485	ukb-b-6066	rs977474	T	C	0.833746	Tea intake || id:ukb-b-6066
237	3.79997e-08	13	80168720	-0.0117331	0.00213314	447485	ukb-b-6066	rs2783129	G	C	0.484878	Tea intake || id:ukb-b-6066
238	4.09996e-08	13	100272019	-0.0134812	0.00245655	447485	ukb-b-6066	rs17576658	A	G	0.247081	Tea intake || id:ukb-b-6066
239	3.69999e-08	13	111531264	-0.0119163	0.00216546	447485	ukb-b-6066	rs6829	T	C	0.596155	Tea intake || id:ukb-b-6066
240	3.50002e-08	13	56444529	-0.0149842	0.0027166	447485	ukb-b-6066	rs2645929	G	A	0.813066	Tea intake || id:ukb-b-6066
241	3.69999e-10	15	60902512	-0.0184399	0.00294243	447485	ukb-b-6066	rs12591786	T	C	0.158804	Tea intake || id:ukb-b-6066
242	2.30144e-109	15	75027880	0.0533453	0.00240098	447485	ukb-b-6066	rs2472297	T	C	0.262049	Tea intake || id:ukb-b-6066
243	1.7e-08	19	4338173	-0.0131035	0.00232117	447485	ukb-b-6066	rs57631352	G	A	0.296859	Tea intake || id:ukb-b-6066
244	3.29989e-11	20	62900120	0.0174715	0.00263421	447485	ukb-b-6066	rs2273447	T	A	0.203788	Tea intake || id:ukb-b-6066
245	4.19952e-12	21	34343828	0.015068	0.0021746	447485	ukb-b-6066	rs4817505	C	T	0.38998	Tea intake || id:ukb-b-6066
246	1.29987e-31	22	24820268	0.0252071	0.00215485	447485	ukb-b-6066	rs9624470	A	G	0.580054	Tea intake || id:ukb-b-6066

## Sheet: MR Gut Microbiota result
id.exposure	id.outcome	outcome	exposure	method	nsnp	b	se	pval	lo_ci	up_ci	or	or_lci95	or_uci95	qvalue
ebi-a-GCST90016948	finn-b-N14_URINOTH	Other diseases of urinary system || id:finn-b-N14_URINOTH	|| id:ebi-a-GCST90016948	Inverse variance weighted	16	-0.117098	0.0467637	0.0122783	-0.208755	-0.0254415	0.889498	0.811594	0.974879	0.674145
ebi-a-GCST90016956	finn-b-N14_URINOTH	Other diseases of urinary system || id:finn-b-N14_URINOTH	|| id:ebi-a-GCST90016956	Inverse variance weighted	19	-0.0802205	0.0401723	0.0458349	-0.158958	-0.00148276	0.922913	0.853032	0.998518	0.674145
ebi-a-GCST90016967	finn-b-N14_URINOTH	Other diseases of urinary system || id:finn-b-N14_URINOTH	|| id:ebi-a-GCST90016967	Inverse variance weighted	13	0.127288	0.0558209	0.0225899	0.0178794	0.236697	1.13574	1.01804	1.26706	0.674145
ebi-a-GCST90016975	finn-b-N14_URINOTH	Other diseases of urinary system || id:finn-b-N14_URINOTH	|| id:ebi-a-GCST90016975	Inverse variance weighted	15	-0.0522228	0.0241303	0.0304488	-0.0995182	-0.00492746	0.949117	0.905273	0.995085	0.674145
ebi-a-GCST90016989	finn-b-N14_URINOTH	Other diseases of urinary system || id:finn-b-N14_URINOTH	|| id:ebi-a-GCST90016989	Inverse variance weighted	10	0.157679	0.0799613	0.0486162	0.000954893	0.314403	1.17079	1.00096	1.36944	0.674145
ebi-a-GCST90017001	finn-b-N14_URINOTH	Other diseases of urinary system || id:finn-b-N14_URINOTH	|| id:ebi-a-GCST90017001	Inverse variance weighted	11	0.0621386	0.0280198	0.0265778	0.0072197	0.117057	1.06411	1.00725	1.12418	0.674145
ebi-a-GCST90017006	finn-b-N14_URINOTH	Other diseases of urinary system || id:finn-b-N14_URINOTH	|| id:ebi-a-GCST90017006	Inverse variance weighted	9	-0.114563	0.0549983	0.0372488	-0.22236	-0.00676625	0.891756	0.800627	0.993257	0.674145
ebi-a-GCST90017023	finn-b-N14_URINOTH	Other diseases of urinary system || id:finn-b-N14_URINOTH	|| id:ebi-a-GCST90017023	Inverse variance weighted	3	0.334303	0.166103	0.0441538	0.00874159	0.659864	1.39697	1.00878	1.93453	0.674145
ebi-a-GCST90017025	finn-b-N14_URINOTH	Other diseases of urinary system || id:finn-b-N14_URINOTH	|| id:ebi-a-GCST90017025	Inverse variance weighted	13	0.091725	0.0414874	0.0270421	0.0104096	0.17304	1.09606	1.01046	1.18891	0.674145
ebi-a-GCST90017034	finn-b-N14_URINOTH	Other diseases of urinary system || id:finn-b-N14_URINOTH	|| id:ebi-a-GCST90017034	Inverse variance weighted	7	0.143954	0.0696915	0.0388676	0.00735841	0.280549	1.15483	1.00739	1.32386	0.674145
ebi-a-GCST90017047	finn-b-N14_URINOTH	Other diseases of urinary system || id:finn-b-N14_URINOTH	|| id:ebi-a-GCST90017047	Inverse variance weighted	13	-0.109613	0.0505935	0.0302689	-0.208777	-0.0104503	0.89618	0.811576	0.989604	0.674145
ebi-a-GCST90017056	finn-b-N14_URINOTH	Other diseases of urinary system || id:finn-b-N14_URINOTH	|| id:ebi-a-GCST90017056	Inverse variance weighted	14	0.141112	0.0606381	0.0199587	0.0222617	0.259963	1.15155	1.02251	1.29688	0.674145
ebi-a-GCST90017068	finn-b-N14_URINOTH	Other diseases of urinary system || id:finn-b-N14_URINOTH	|| id:ebi-a-GCST90017068	Inverse variance weighted	5	0.171122	0.0816908	0.036193	0.011008	0.331236	1.18664	1.01107	1.39269	0.674145
ebi-a-GCST90017075	finn-b-N14_URINOTH	Other diseases of urinary system || id:finn-b-N14_URINOTH	|| id:ebi-a-GCST90017075	Inverse variance weighted	13	0.069588	0.0350708	0.0472322	0.000849138	0.138327	1.07207	1.00085	1.14835	0.674145
ebi-a-GCST90017091	finn-b-N14_URINOTH	Other diseases of urinary system || id:finn-b-N14_URINOTH	|| id:ebi-a-GCST90017091	Inverse variance weighted	9	0.0581965	0.0294175	0.0478959	0.000538081	0.115855	1.05992	1.00054	1.12283	0.674145
ebi-a-GCST90016920	finn-b-N14_URINOTH	Other diseases of urinary system || id:finn-b-N14_URINOTH	|| id:ebi-a-GCST90016920	Inverse variance weighted	10	0.0581744	0.0314098	0.0640103	-0.00338887	0.119738	1.0599	0.996617	1.1272	0.700744
ebi-a-GCST90016942	finn-b-N14_URINOTH	Other diseases of urinary system || id:finn-b-N14_URINOTH	|| id:ebi-a-GCST90016942	Inverse variance weighted	10	0.0581744	0.0314098	0.0640103	-0.00338887	0.119738	1.0599	0.996617	1.1272	0.700744
ebi-a-GCST90016980	finn-b-N14_URINOTH	Other diseases of urinary system || id:finn-b-N14_URINOTH	|| id:ebi-a-GCST90016980	Inverse variance weighted	7	-0.112884	0.0598698	0.0593643	-0.230228	0.00446118	0.893255	0.794352	1.00447	0.700744
ebi-a-GCST90017102	finn-b-N14_URINOTH	Other diseases of urinary system || id:finn-b-N14_URINOTH	|| id:ebi-a-GCST90017102	Inverse variance weighted	10	0.0581744	0.0314098	0.0640103	-0.00338887	0.119738	1.0599	0.996617	1.1272	0.700744
ebi-a-GCST90017085	finn-b-N14_URINOTH	Other diseases of urinary system || id:finn-b-N14_URINOTH	|| id:ebi-a-GCST90017085	Inverse variance weighted	13	0.0677647	0.0371903	0.0684386	-0.00512825	0.140658	1.07011	0.994885	1.15103	0.701238
ebi-a-GCST90017106	finn-b-N14_URINOTH	Other diseases of urinary system || id:finn-b-N14_URINOTH	|| id:ebi-a-GCST90017106	Inverse variance weighted	14	0.0671586	0.0371705	0.0707981	-0.00569563	0.140013	1.06947	0.994321	1.15029	0.701238
ebi-a-GCST90016916	finn-b-N14_URINOTH	Other diseases of urinary system || id:finn-b-N14_URINOTH	|| id:ebi-a-GCST90016916	Inverse variance weighted	13	-0.101165	0.0600829	0.0922302	-0.218927	0.016598	0.903784	0.80338	1.01674	0.706108
ebi-a-GCST90016937	finn-b-N14_URINOTH	Other diseases of urinary system || id:finn-b-N14_URINOTH	|| id:ebi-a-GCST90016937	Inverse variance weighted	13	-0.101165	0.0600829	0.0922302	-0.218927	0.016598	0.903784	0.80338	1.01674	0.706108
ebi-a-GCST90016984	finn-b-N14_URINOTH	Other diseases of urinary system || id:finn-b-N14_URINOTH	|| id:ebi-a-GCST90016984	Inverse variance weighted	8	-0.103628	0.0610805	0.0897772	-0.223345	0.0160902	0.901561	0.799839	1.01622	0.706108
ebi-a-GCST90017021	finn-b-N14_URINOTH	Other diseases of urinary system || id:finn-b-N14_URINOTH	|| id:ebi-a-GCST90017021	Inverse variance weighted	12	0.0841742	0.0504241	0.095053	-0.014657	0.183005	1.08782	0.98545	1.20082	0.706108
ebi-a-GCST90017032	finn-b-N14_URINOTH	Other diseases of urinary system || id:finn-b-N14_URINOTH	|| id:ebi-a-GCST90017032	Inverse variance weighted	10	0.0943458	0.0561967	0.0931816	-0.0157998	0.204491	1.09894	0.984324	1.2269	0.706108
ebi-a-GCST90017049	finn-b-N14_URINOTH	Other diseases of urinary system || id:finn-b-N14_URINOTH	|| id:ebi-a-GCST90017049	Inverse variance weighted	11	-0.107848	0.0620215	0.0820554	-0.22941	0.013714	0.897764	0.795002	1.01381	0.706108
ebi-a-GCST90017099	finn-b-N14_URINOTH	Other diseases of urinary system || id:finn-b-N14_URINOTH	|| id:ebi-a-GCST90017099	Inverse variance weighted	13	-0.101165	0.0600829	0.0922302	-0.218927	0.016598	0.903784	0.80338	1.01674	0.706108
ebi-a-GCST90017069	finn-b-N14_URINOTH	Other diseases of urinary system || id:finn-b-N14_URINOTH	|| id:ebi-a-GCST90017069	Inverse variance weighted	6	0.0865045	0.0524198	0.0988967	-0.0162383	0.189247	1.09036	0.983893	1.20834	0.709328
ebi-a-GCST90017016	finn-b-N14_URINOTH	Other diseases of urinary system || id:finn-b-N14_URINOTH	|| id:ebi-a-GCST90017016	Inverse variance weighted	9	-0.0488696	0.0302352	0.106026	-0.108131	0.0103914	0.952305	0.89751	1.01045	0.735114
ebi-a-GCST90017059	finn-b-N14_URINOTH	Other diseases of urinary system || id:finn-b-N14_URINOTH	|| id:ebi-a-GCST90017059	Inverse variance weighted	8	-0.0510937	0.0322898	0.11357	-0.114382	0.0121942	0.95019	0.891917	1.01227	0.762016
ebi-a-GCST90017045	finn-b-N14_URINOTH	Other diseases of urinary system || id:finn-b-N14_URINOTH	|| id:ebi-a-GCST90017045	Inverse variance weighted	15	-0.0568925	0.0376121	0.130379	-0.130612	0.0168272	0.944696	0.877558	1.01697	0.84746
ebi-a-GCST90016908	finn-b-N14_URINOTH	Other diseases of urinary system || id:finn-b-N14_URINOTH	|| id:ebi-a-GCST90016908	Inverse variance weighted	15	-0.047777	0.0459796	0.298762	-0.137897	0.042343	0.953346	0.871188	1.04325	0.886032
ebi-a-GCST90016910	finn-b-N14_URINOTH	Other diseases of urinary system || id:finn-b-N14_URINOTH	|| id:ebi-a-GCST90016910	Inverse variance weighted	18	-0.0580911	0.0466946	0.213475	-0.149613	0.0334303	0.943564	0.861042	1.034	0.886032
ebi-a-GCST90016911	finn-b-N14_URINOTH	Other diseases of urinary system || id:finn-b-N14_URINOTH	|| id:ebi-a-GCST90016911	Inverse variance weighted	14	-0.0520318	0.0525119	0.321756	-0.154955	0.0508917	0.949299	0.856454	1.05221	0.886032
ebi-a-GCST90016917	finn-b-N14_URINOTH	Other diseases of urinary system || id:finn-b-N14_URINOTH	|| id:ebi-a-GCST90016917	Inverse variance weighted	6	-0.14988	0.107361	0.162706	-0.360308	0.0605488	0.860812	0.697461	1.06242	0.886032
ebi-a-GCST90016921	finn-b-N14_URINOTH	Other diseases of urinary system || id:finn-b-N14_URINOTH	|| id:ebi-a-GCST90016921	Inverse variance weighted	12	-0.0479494	0.0474867	0.312618	-0.141023	0.0451244	0.953182	0.868469	1.04616	0.886032
ebi-a-GCST90016923	finn-b-N14_URINOTH	Other diseases of urinary system || id:finn-b-N14_URINOTH	|| id:ebi-a-GCST90016923	Inverse variance weighted	11	-0.0664982	0.0560937	0.235826	-0.176442	0.0434455	0.935665	0.838248	1.0444	0.886032
ebi-a-GCST90016930	finn-b-N14_URINOTH	Other diseases of urinary system || id:finn-b-N14_URINOTH	|| id:ebi-a-GCST90016930	Inverse variance weighted	26	0.0466313	0.048095	0.332262	-0.0476348	0.140897	1.04774	0.953482	1.15131	0.886032
ebi-a-GCST90016936	finn-b-N14_URINOTH	Other diseases of urinary system || id:finn-b-N14_URINOTH	|| id:ebi-a-GCST90016936	Inverse variance weighted	7	-0.0884299	0.0720208	0.219508	-0.229591	0.0527309	0.915367	0.794859	1.05415	0.886032
ebi-a-GCST90016938	finn-b-N14_URINOTH	Other diseases of urinary system || id:finn-b-N14_URINOTH	|| id:ebi-a-GCST90016938	Inverse variance weighted	8	-0.0424326	0.0307201	0.167197	-0.102644	0.0177788	0.958455	0.902448	1.01794	0.886032
ebi-a-GCST90016949	finn-b-N14_URINOTH	Other diseases of urinary system || id:finn-b-N14_URINOTH	|| id:ebi-a-GCST90016949	Inverse variance weighted	15	0.0378097	0.0362153	0.296474	-0.0331723	0.108792	1.03853	0.967372	1.11493	0.886032
ebi-a-GCST90016955	finn-b-N14_URINOTH	Other diseases of urinary system || id:finn-b-N14_URINOTH	|| id:ebi-a-GCST90016955	Inverse variance weighted	13	0.0464683	0.0387297	0.230212	-0.0294418	0.122379	1.04756	0.970987	1.13018	0.886032
ebi-a-GCST90016957	finn-b-N14_URINOTH	Other diseases of urinary system || id:finn-b-N14_URINOTH	|| id:ebi-a-GCST90016957	Inverse variance weighted	11	-0.0665507	0.0561032	0.235536	-0.176513	0.0434116	0.935615	0.838188	1.04437	0.886032
ebi-a-GCST90016959	finn-b-N14_URINOTH	Other diseases of urinary system || id:finn-b-N14_URINOTH	|| id:ebi-a-GCST90016959	Inverse variance weighted	7	-0.0529422	0.0485602	0.275608	-0.14812	0.0422357	0.948435	0.862328	1.04314	0.886032
ebi-a-GCST90016961	finn-b-N14_URINOTH	Other diseases of urinary system || id:finn-b-N14_URINOTH	|| id:ebi-a-GCST90016961	Inverse variance weighted	11	-0.0664939	0.0560871	0.235802	-0.176425	0.0434369	0.935669	0.838262	1.04439	0.886032
ebi-a-GCST90016963	finn-b-N14_URINOTH	Other diseases of urinary system || id:finn-b-N14_URINOTH	|| id:ebi-a-GCST90016963	Inverse variance weighted	8	0.0315293	0.0306221	0.303186	-0.0284901	0.0915487	1.03203	0.971912	1.09587	0.886032
ebi-a-GCST90016969	finn-b-N14_URINOTH	Other diseases of urinary system || id:finn-b-N14_URINOTH	|| id:ebi-a-GCST90016969	Inverse variance weighted	13	0.0694897	0.0639484	0.277191	-0.0558493	0.194829	1.07196	0.945682	1.2151	0.886032
ebi-a-GCST90016977	finn-b-N14_URINOTH	Other diseases of urinary system || id:finn-b-N14_URINOTH	|| id:ebi-a-GCST90016977	Inverse variance weighted	4	-0.0574629	0.0462346	0.213922	-0.148083	0.033157	0.944157	0.86236	1.03371	0.886032
ebi-a-GCST90016982	finn-b-N14_URINOTH	Other diseases of urinary system || id:finn-b-N14_URINOTH	|| id:ebi-a-GCST90016982	Inverse variance weighted	10	-0.0415245	0.0407845	0.308609	-0.121462	0.0384131	0.959326	0.885625	1.03916	0.886032
ebi-a-GCST90016988	finn-b-N14_URINOTH	Other diseases of urinary system || id:finn-b-N14_URINOTH	|| id:ebi-a-GCST90016988	Inverse variance weighted	11	0.0587104	0.0522012	0.260719	-0.0436041	0.161025	1.06047	0.957333	1.17471	0.886032
ebi-a-GCST90016992	finn-b-N14_URINOTH	Other diseases of urinary system || id:finn-b-N14_URINOTH	|| id:ebi-a-GCST90016992	Inverse variance weighted	6	0.0656735	0.0566342	0.246209	-0.0453296	0.176677	1.06788	0.955682	1.19325	0.886032
ebi-a-GCST90016993	finn-b-N14_URINOTH	Other diseases of urinary system || id:finn-b-N14_URINOTH	|| id:ebi-a-GCST90016993	Inverse variance weighted	15	-0.0717408	0.0528781	0.17487	-0.175382	0.0319002	0.930772	0.839137	1.03241	0.886032
ebi-a-GCST90016996	finn-b-N14_URINOTH	Other diseases of urinary system || id:finn-b-N14_URINOTH	|| id:ebi-a-GCST90016996	Inverse variance weighted	10	-0.0354315	0.0321971	0.271134	-0.0985378	0.0276748	0.965189	0.906161	1.02806	0.886032
ebi-a-GCST90017010	finn-b-N14_URINOTH	Other diseases of urinary system || id:finn-b-N14_URINOTH	|| id:ebi-a-GCST90017010	Inverse variance weighted	5	0.0967659	0.0712609	0.174492	-0.0429055	0.236437	1.1016	0.958002	1.26673	0.886032
ebi-a-GCST90017019	finn-b-N14_URINOTH	Other diseases of urinary system || id:finn-b-N14_URINOTH	|| id:ebi-a-GCST90017019	Inverse variance weighted	16	0.0434858	0.0423951	0.30502	-0.0396085	0.12658	1.04445	0.961166	1.13494	0.886032
ebi-a-GCST90017022	finn-b-N14_URINOTH	Other diseases of urinary system || id:finn-b-N14_URINOTH	|| id:ebi-a-GCST90017022	Inverse variance weighted	9	-0.0590616	0.0448734	0.188112	-0.147013	0.0288902	0.942649	0.863282	1.02931	0.886032
ebi-a-GCST90017028	finn-b-N14_URINOTH	Other diseases of urinary system || id:finn-b-N14_URINOTH	|| id:ebi-a-GCST90017028	Inverse variance weighted	10	-0.05763	0.0586941	0.326164	-0.172671	0.0574105	0.943999	0.841415	1.05909	0.886032
ebi-a-GCST90017040	finn-b-N14_URINOTH	Other diseases of urinary system || id:finn-b-N14_URINOTH	|| id:ebi-a-GCST90017040	Inverse variance weighted	13	0.0413821	0.0343116	0.227791	-0.0258686	0.108633	1.04225	0.974463	1.11475	0.886032
ebi-a-GCST90017050	finn-b-N14_URINOTH	Other diseases of urinary system || id:finn-b-N14_URINOTH	|| id:ebi-a-GCST90017050	Inverse variance weighted	15	0.0882816	0.0657965	0.179681	-0.0406796	0.217243	1.0923	0.960137	1.24265	0.886032
ebi-a-GCST90017052	finn-b-N14_URINOTH	Other diseases of urinary system || id:finn-b-N14_URINOTH	|| id:ebi-a-GCST90017052	Inverse variance weighted	13	0.0687155	0.0647862	0.288849	-0.0582656	0.195696	1.07113	0.943399	1.21616	0.886032
ebi-a-GCST90017054	finn-b-N14_URINOTH	Other diseases of urinary system || id:finn-b-N14_URINOTH	|| id:ebi-a-GCST90017054	Inverse variance weighted	12	-0.0686835	0.0604438	0.255823	-0.187153	0.0497864	0.933622	0.829316	1.05105	0.886032
ebi-a-GCST90017058	finn-b-N14_URINOTH	Other diseases of urinary system || id:finn-b-N14_URINOTH	|| id:ebi-a-GCST90017058	Inverse variance weighted	6	-0.0948938	0.0666768	0.154681	-0.22558	0.0357928	0.909469	0.798053	1.03644	0.886032
ebi-a-GCST90017060	finn-b-N14_URINOTH	Other diseases of urinary system || id:finn-b-N14_URINOTH	|| id:ebi-a-GCST90017060	Inverse variance weighted	12	-0.0694517	0.0565376	0.219291	-0.180265	0.0413621	0.932905	0.835049	1.04223	0.886032
ebi-a-GCST90017063	finn-b-N14_URINOTH	Other diseases of urinary system || id:finn-b-N14_URINOTH	|| id:ebi-a-GCST90017063	Inverse variance weighted	15	-0.0673361	0.0497226	0.175662	-0.164792	0.0301203	0.934881	0.84807	1.03058	0.886032
ebi-a-GCST90017071	finn-b-N14_URINOTH	Other diseases of urinary system || id:finn-b-N14_URINOTH	|| id:ebi-a-GCST90017071	Inverse variance weighted	11	-0.0552088	0.0568516	0.331497	-0.166638	0.0562204	0.946288	0.846506	1.05783	0.886032
ebi-a-GCST90017080	finn-b-N14_URINOTH	Other diseases of urinary system || id:finn-b-N14_URINOTH	|| id:ebi-a-GCST90017080	Inverse variance weighted	13	0.0464683	0.0387297	0.230212	-0.0294418	0.122379	1.04756	0.970987	1.13018	0.886032
ebi-a-GCST90017081	finn-b-N14_URINOTH	Other diseases of urinary system || id:finn-b-N14_URINOTH	|| id:ebi-a-GCST90017081	Inverse variance weighted	12	-0.0619624	0.053166	0.243836	-0.166168	0.0422429	0.939918	0.846904	1.04315	0.886032
ebi-a-GCST90017082	finn-b-N14_URINOTH	Other diseases of urinary system || id:finn-b-N14_URINOTH	|| id:ebi-a-GCST90017082	Inverse variance weighted	10	-0.0491726	0.045539	0.280235	-0.138429	0.0400838	0.952017	0.870725	1.0409	0.886032
ebi-a-GCST90017086	finn-b-N14_URINOTH	Other diseases of urinary system || id:finn-b-N14_URINOTH	|| id:ebi-a-GCST90017086	Inverse variance weighted	14	-0.0437637	0.0446764	0.327298	-0.131329	0.043802	0.95718	0.876929	1.04478	0.886032
ebi-a-GCST90017088	finn-b-N14_URINOTH	Other diseases of urinary system || id:finn-b-N14_URINOTH	|| id:ebi-a-GCST90017088	Inverse variance weighted	6	0.0711513	0.0626002	0.255707	-0.0515452	0.193848	1.07374	0.949761	1.21391	0.886032
ebi-a-GCST90017092	finn-b-N14_URINOTH	Other diseases of urinary system || id:finn-b-N14_URINOTH	|| id:ebi-a-GCST90017092	Inverse variance weighted	14	-0.0520318	0.0525119	0.321756	-0.154955	0.0508917	0.949299	0.856454	1.05221	0.886032
ebi-a-GCST90017098	finn-b-N14_URINOTH	Other diseases of urinary system || id:finn-b-N14_URINOTH	|| id:ebi-a-GCST90017098	Inverse variance weighted	7	-0.0884299	0.0720208	0.219508	-0.229591	0.0527309	0.915367	0.794859	1.05415	0.886032
ebi-a-GCST90017101	finn-b-N14_URINOTH	Other diseases of urinary system || id:finn-b-N14_URINOTH	|| id:ebi-a-GCST90017101	Inverse variance weighted	15	-0.0608712	0.051754	0.239529	-0.162309	0.0405666	0.940944	0.850178	1.0414	0.886032
ebi-a-GCST90017104	finn-b-N14_URINOTH	Other diseases of urinary system || id:finn-b-N14_URINOTH	|| id:ebi-a-GCST90017104	Inverse variance weighted	13	0.0464683	0.0387297	0.230212	-0.0294418	0.122379	1.04756	0.970987	1.13018	0.886032
ebi-a-GCST90017108	finn-b-N14_URINOTH	Other diseases of urinary system || id:finn-b-N14_URINOTH	|| id:ebi-a-GCST90017108	Inverse variance weighted	11	-0.0664982	0.0560937	0.235826	-0.176442	0.0434455	0.935665	0.838248	1.0444	0.886032
ebi-a-GCST90017110	finn-b-N14_URINOTH	Other diseases of urinary system || id:finn-b-N14_URINOTH	|| id:ebi-a-GCST90017110	Inverse variance weighted	15	0.0669999	0.0524749	0.201673	-0.0358508	0.169851	1.0693	0.964784	1.18513	0.886032
ebi-a-GCST90017117	finn-b-N14_URINOTH	Other diseases of urinary system || id:finn-b-N14_URINOTH	|| id:ebi-a-GCST90017117	Inverse variance weighted	12	-0.0479494	0.0474867	0.312618	-0.141023	0.0451244	0.953182	0.868469	1.04616	0.886032
ebi-a-GCST90017013	finn-b-N14_URINOTH	Other diseases of urinary system || id:finn-b-N14_URINOTH	|| id:ebi-a-GCST90017013	Inverse variance weighted	9	-0.0407068	0.0432058	0.346111	-0.12539	0.0439766	0.960111	0.882153	1.04496	0.893165
ebi-a-GCST90017041	finn-b-N14_URINOTH	Other diseases of urinary system || id:finn-b-N14_URINOTH	|| id:ebi-a-GCST90017041	Inverse variance weighted	14	-0.0380489	0.0408449	0.351571	-0.118105	0.0420071	0.962666	0.888603	1.0429	0.893165
ebi-a-GCST90017043	finn-b-N14_URINOTH	Other diseases of urinary system || id:finn-b-N14_URINOTH	|| id:ebi-a-GCST90017043	Inverse variance weighted	8	-0.0530518	0.0575254	0.356407	-0.165802	0.059698	0.948331	0.847214	1.06152	0.893165
ebi-a-GCST90017084	finn-b-N14_URINOTH	Other diseases of urinary system || id:finn-b-N14_URINOTH	|| id:ebi-a-GCST90017084	Inverse variance weighted	15	-0.0425057	0.0457363	0.3527	-0.132149	0.0471375	0.958385	0.876211	1.04827	0.893165
ebi-a-GCST90017113	finn-b-N14_URINOTH	Other diseases of urinary system || id:finn-b-N14_URINOTH	|| id:ebi-a-GCST90017113	Inverse variance weighted	12	0.0281963	0.0302668	0.351547	-0.0311266	0.0875192	1.0286	0.969353	1.09146	0.893165
ebi-a-GCST90017062	finn-b-N14_URINOTH	Other diseases of urinary system || id:finn-b-N14_URINOTH	|| id:ebi-a-GCST90017062	Inverse variance weighted	10	0.0516059	0.0573535	0.368234	-0.060807	0.164019	1.05296	0.941005	1.17824	0.911818
ebi-a-GCST90016909	finn-b-N14_URINOTH	Other diseases of urinary system || id:finn-b-N14_URINOTH	|| id:ebi-a-GCST90016909	Inverse variance weighted	7	0.049033	0.0555343	0.377273	-0.0598143	0.15788	1.05026	0.941939	1.17103	0.912475
ebi-a-GCST90016950	finn-b-N14_URINOTH	Other diseases of urinary system || id:finn-b-N14_URINOTH	|| id:ebi-a-GCST90016950	Inverse variance weighted	17	0.0434478	0.0488668	0.373945	-0.052331	0.139227	1.04441	0.949015	1.14938	0.912475
ebi-a-GCST90016987	finn-b-N14_URINOTH	Other diseases of urinary system || id:finn-b-N14_URINOTH	|| id:ebi-a-GCST90016987	Inverse variance weighted	10	0.0586537	0.0679147	0.387787	-0.0744592	0.191767	1.06041	0.928245	1.21139	0.927124
ebi-a-GCST90016914	finn-b-N14_URINOTH	Other diseases of urinary system || id:finn-b-N14_URINOTH	|| id:ebi-a-GCST90016914	Inverse variance weighted	13	0.050243	0.0670214	0.453462	-0.0811189	0.181605	1.05153	0.922084	1.19914	0.930726
ebi-a-GCST90016918	finn-b-N14_URINOTH	Other diseases of urinary system || id:finn-b-N14_URINOTH	|| id:ebi-a-GCST90016918	Inverse variance weighted	8	0.0170995	0.0382445	0.654795	-0.0578596	0.0920587	1.01725	0.943782	1.09643	0.930726
ebi-a-GCST90016922	finn-b-N14_URINOTH	Other diseases of urinary system || id:finn-b-N14_URINOTH	|| id:ebi-a-GCST90016922	Inverse variance weighted	12	-0.0365306	0.0825537	0.658122	-0.198336	0.125275	0.964129	0.820094	1.13346	0.930726
ebi-a-GCST90016924	finn-b-N14_URINOTH	Other diseases of urinary system || id:finn-b-N14_URINOTH	|| id:ebi-a-GCST90016924	Inverse variance weighted	7	-0.0243335	0.0579968	0.674802	-0.138007	0.0893402	0.97596	0.871092	1.09345	0.930726
ebi-a-GCST90016925	finn-b-N14_URINOTH	Other diseases of urinary system || id:finn-b-N14_URINOTH	|| id:ebi-a-GCST90016925	Inverse variance weighted	5	-0.0434327	0.0577474	0.451982	-0.156618	0.0697522	0.957497	0.855031	1.07224	0.930726
ebi-a-GCST90016928	finn-b-N14_URINOTH	Other diseases of urinary system || id:finn-b-N14_URINOTH	|| id:ebi-a-GCST90016928	Inverse variance weighted	8	-0.0256353	0.0494965	0.604513	-0.122648	0.0713777	0.97469	0.884575	1.07399	0.930726
ebi-a-GCST90016929	finn-b-N14_URINOTH	Other diseases of urinary system || id:finn-b-N14_URINOTH	|| id:ebi-a-GCST90016929	Inverse variance weighted	12	-0.0408902	0.0599442	0.495151	-0.158381	0.0766003	0.959934	0.853525	1.07961	0.930726
ebi-a-GCST90016931	finn-b-N14_URINOTH	Other diseases of urinary system || id:finn-b-N14_URINOTH	|| id:ebi-a-GCST90016931	Inverse variance weighted	10	-0.0475101	0.0587228	0.418482	-0.162607	0.0675866	0.953601	0.849925	1.06992	0.930726
ebi-a-GCST90016933	finn-b-N14_URINOTH	Other diseases of urinary system || id:finn-b-N14_URINOTH	|| id:ebi-a-GCST90016933	Inverse variance weighted	13	0.050243	0.0670214	0.453462	-0.0811189	0.181605	1.05153	0.922084	1.19914	0.930726
ebi-a-GCST90016935	finn-b-N14_URINOTH	Other diseases of urinary system || id:finn-b-N14_URINOTH	|| id:ebi-a-GCST90016935	Inverse variance weighted	10	-0.0295127	0.0644888	0.647211	-0.155911	0.0968854	0.970919	0.855636	1.10173	0.930726
ebi-a-GCST90016940	finn-b-N14_URINOTH	Other diseases of urinary system || id:finn-b-N14_URINOTH	|| id:ebi-a-GCST90016940	Inverse variance weighted	16	0.0451925	0.0547338	0.408987	-0.0620858	0.152471	1.04623	0.939802	1.16471	0.930726
ebi-a-GCST90016941	finn-b-N14_URINOTH	Other diseases of urinary system || id:finn-b-N14_URINOTH	|| id:ebi-a-GCST90016941	Inverse variance weighted	8	0.019454	0.0416006	0.640044	-0.0620832	0.100991	1.01964	0.939805	1.10627	0.930726
ebi-a-GCST90016943	finn-b-N14_URINOTH	Other diseases of urinary system || id:finn-b-N14_URINOTH	|| id:ebi-a-GCST90016943	Inverse variance weighted	14	-0.0185412	0.0330073	0.574299	-0.0832355	0.046153	0.98163	0.920134	1.04723	0.930726
ebi-a-GCST90016944	finn-b-N14_URINOTH	Other diseases of urinary system || id:finn-b-N14_URINOTH	|| id:ebi-a-GCST90016944	Inverse variance weighted	14	-0.0163033	0.0360122	0.650754	-0.0868872	0.0542806	0.983829	0.916781	1.05578	0.930726
ebi-a-GCST90016947	finn-b-N14_URINOTH	Other diseases of urinary system || id:finn-b-N14_URINOTH	|| id:ebi-a-GCST90016947	Inverse variance weighted	9	-0.0444571	0.0813203	0.584591	-0.203845	0.114931	0.956517	0.815589	1.1218	0.930726
ebi-a-GCST90016951	finn-b-N14_URINOTH	Other diseases of urinary system || id:finn-b-N14_URINOTH	|| id:ebi-a-GCST90016951	Inverse variance weighted	9	0.0543153	0.0672269	0.419125	-0.0774494	0.18608	1.05582	0.925474	1.20452	0.930726
ebi-a-GCST90016954	finn-b-N14_URINOTH	Other diseases of urinary system || id:finn-b-N14_URINOTH	|| id:ebi-a-GCST90016954	Inverse variance weighted	13	-0.0273325	0.0527582	0.604409	-0.130739	0.0760737	0.973038	0.877447	1.07904	0.930726
ebi-a-GCST90016958	finn-b-N14_URINOTH	Other diseases of urinary system || id:finn-b-N14_URINOTH	|| id:ebi-a-GCST90016958	Inverse variance weighted	12	0.025379	0.0403465	0.529332	-0.0537001	0.104458	1.0257	0.947716	1.11011	0.930726
ebi-a-GCST90016962	finn-b-N14_URINOTH	Other diseases of urinary system || id:finn-b-N14_URINOTH	|| id:ebi-a-GCST90016962	Inverse variance weighted	13	0.0249973	0.0623418	0.688441	-0.0971926	0.147187	1.02531	0.907381	1.15857	0.930726
ebi-a-GCST90016965	finn-b-N14_URINOTH	Other diseases of urinary system || id:finn-b-N14_URINOTH	|| id:ebi-a-GCST90016965	Inverse variance weighted	11	-0.0238781	0.0361417	0.508818	-0.0947158	0.0469597	0.976405	0.909631	1.04808	0.930726
ebi-a-GCST90016966	finn-b-N14_URINOTH	Other diseases of urinary system || id:finn-b-N14_URINOTH	|| id:ebi-a-GCST90016966	Inverse variance weighted	13	-0.050409	0.062913	0.422987	-0.173719	0.0729005	0.95084	0.840533	1.07562	0.930726
ebi-a-GCST90016971	finn-b-N14_URINOTH	Other diseases of urinary system || id:finn-b-N14_URINOTH	|| id:ebi-a-GCST90016971	Inverse variance weighted	13	0.0414289	0.0519277	0.424975	-0.0603494	0.143207	1.0423	0.941436	1.15397	0.930726
ebi-a-GCST90016976	finn-b-N14_URINOTH	Other diseases of urinary system || id:finn-b-N14_URINOTH	|| id:ebi-a-GCST90016976	Inverse variance weighted	11	-0.0172937	0.0432253	0.689095	-0.102015	0.0674279	0.982855	0.903016	1.06975	0.930726
ebi-a-GCST90016978	finn-b-N14_URINOTH	Other diseases of urinary system || id:finn-b-N14_URINOTH	|| id:ebi-a-GCST90016978	Inverse variance weighted	10	0.0355054	0.0652392	0.58628	-0.0923635	0.163374	1.03614	0.911774	1.17748	0.930726
ebi-a-GCST90016983	finn-b-N14_URINOTH	Other diseases of urinary system || id:finn-b-N14_URINOTH	|| id:ebi-a-GCST90016983	Inverse variance weighted	11	-0.0327771	0.0740134	0.657872	-0.177843	0.112289	0.967754	0.837073	1.11884	0.930726
ebi-a-GCST90016985	finn-b-N14_URINOTH	Other diseases of urinary system || id:finn-b-N14_URINOTH	|| id:ebi-a-GCST90016985	Inverse variance weighted	9	0.0436261	0.0702493	0.534588	-0.0940626	0.181315	1.04459	0.910226	1.19879	0.930726
ebi-a-GCST90016986	finn-b-N14_URINOTH	Other diseases of urinary system || id:finn-b-N14_URINOTH	|| id:ebi-a-GCST90016986	Inverse variance weighted	9	-0.0222838	0.0497236	0.654042	-0.119742	0.0751743	0.977963	0.887149	1.07807	0.930726
ebi-a-GCST90016995	finn-b-N14_URINOTH	Other diseases of urinary system || id:finn-b-N14_URINOTH	|| id:ebi-a-GCST90016995	Inverse variance weighted	10	-0.0307431	0.0703764	0.662229	-0.168681	0.107195	0.969725	0.844778	1.11315	0.930726
ebi-a-GCST90017000	finn-b-N14_URINOTH	Other diseases of urinary system || id:finn-b-N14_URINOTH	|| id:ebi-a-GCST90017000	Inverse variance weighted	16	0.0264522	0.0436914	0.544891	-0.0591829	0.112087	1.02681	0.942534	1.11861	0.930726
ebi-a-GCST90017002	finn-b-N14_URINOTH	Other diseases of urinary system || id:finn-b-N14_URINOTH	|| id:ebi-a-GCST90017002	Inverse variance weighted	5	-0.0221656	0.0515118	0.666977	-0.123129	0.0787976	0.978078	0.88415	1.08199	0.930726
ebi-a-GCST90017003	finn-b-N14_URINOTH	Other diseases of urinary system || id:finn-b-N14_URINOTH	|| id:ebi-a-GCST90017003	Inverse variance weighted	8	-0.033848	0.0838333	0.686394	-0.198161	0.130465	0.966718	0.820238	1.13936	0.930726
ebi-a-GCST90017007	finn-b-N14_URINOTH	Other diseases of urinary system || id:finn-b-N14_URINOTH	|| id:ebi-a-GCST90017007	Inverse variance weighted	10	0.0328254	0.0506839	0.517211	-0.066515	0.132166	1.03337	0.935649	1.1413	0.930726
ebi-a-GCST90017014	finn-b-N14_URINOTH	Other diseases of urinary system || id:finn-b-N14_URINOTH	|| id:ebi-a-GCST90017014	Inverse variance weighted	11	0.022819	0.0373733	0.541485	-0.0504327	0.0960707	1.02308	0.950818	1.10084	0.930726
ebi-a-GCST90017017	finn-b-N14_URINOTH	Other diseases of urinary system || id:finn-b-N14_URINOTH	|| id:ebi-a-GCST90017017	Inverse variance weighted	5	-0.0345762	0.0461799	0.454022	-0.125089	0.0559365	0.966015	0.882418	1.05753	0.930726
ebi-a-GCST90017018	finn-b-N14_URINOTH	Other diseases of urinary system || id:finn-b-N14_URINOTH	|| id:ebi-a-GCST90017018	Inverse variance weighted	15	0.0318215	0.0553162	0.565112	-0.0765984	0.140241	1.03233	0.926262	1.15055	0.930726
ebi-a-GCST90017024	finn-b-N14_URINOTH	Other diseases of urinary system || id:finn-b-N14_URINOTH	|| id:ebi-a-GCST90017024	Inverse variance weighted	15	-0.0207578	0.0446117	0.641717	-0.108197	0.0666811	0.979456	0.897451	1.06895	0.930726
ebi-a-GCST90017027	finn-b-N14_URINOTH	Other diseases of urinary system || id:finn-b-N14_URINOTH	|| id:ebi-a-GCST90017027	Inverse variance weighted	11	0.0162652	0.0389931	0.676582	-0.0601611	0.0926916	1.0164	0.941613	1.09712	0.930726
ebi-a-GCST90017030	finn-b-N14_URINOTH	Other diseases of urinary system || id:finn-b-N14_URINOTH	|| id:ebi-a-GCST90017030	Inverse variance weighted	9	0.0290601	0.0444777	0.513522	-0.0581161	0.116236	1.02949	0.94354	1.12326	0.930726
ebi-a-GCST90017031	finn-b-N14_URINOTH	Other diseases of urinary system || id:finn-b-N14_URINOTH	|| id:ebi-a-GCST90017031	Inverse variance weighted	9	0.01901	0.0392221	0.627906	-0.0578652	0.0958853	1.01919	0.943777	1.10063	0.930726
ebi-a-GCST90017035	finn-b-N14_URINOTH	Other diseases of urinary system || id:finn-b-N14_URINOTH	|| id:ebi-a-GCST90017035	Inverse variance weighted	10	-0.0144746	0.0294208	0.622729	-0.0721393	0.0431901	0.98563	0.930401	1.04414	0.930726
ebi-a-GCST90017036	finn-b-N14_URINOTH	Other diseases of urinary system || id:finn-b-N14_URINOTH	|| id:ebi-a-GCST90017036	Inverse variance weighted	13	-0.0202033	0.0401163	0.614529	-0.0988312	0.0584245	0.979999	0.905896	1.06016	0.930726
ebi-a-GCST90017038	finn-b-N14_URINOTH	Other diseases of urinary system || id:finn-b-N14_URINOTH	|| id:ebi-a-GCST90017038	Inverse variance weighted	11	-0.0255224	0.0343427	0.457379	-0.092834	0.0417892	0.974801	0.911345	1.04267	0.930726
ebi-a-GCST90017042	finn-b-N14_URINOTH	Other diseases of urinary system || id:finn-b-N14_URINOTH	|| id:ebi-a-GCST90017042	Inverse variance weighted	12	-0.0250534	0.0326533	0.442929	-0.0890539	0.038947	0.975258	0.914796	1.03972	0.930726
ebi-a-GCST90017044	finn-b-N14_URINOTH	Other diseases of urinary system || id:finn-b-N14_URINOTH	|| id:ebi-a-GCST90017044	Inverse variance weighted	11	-0.0261487	0.0433992	0.546831	-0.111211	0.0589137	0.97419	0.89475	1.06068	0.930726
ebi-a-GCST90017048	finn-b-N14_URINOTH	Other diseases of urinary system || id:finn-b-N14_URINOTH	|| id:ebi-a-GCST90017048	Inverse variance weighted	13	-0.0284813	0.0579884	0.623317	-0.142138	0.0851759	0.97192	0.867501	1.08891	0.930726
ebi-a-GCST90017053	finn-b-N14_URINOTH	Other diseases of urinary system || id:finn-b-N14_URINOTH	|| id:ebi-a-GCST90017053	Inverse variance weighted	22	-0.0300904	0.0396593	0.448019	-0.107823	0.0476419	0.970358	0.897787	1.0488	0.930726
ebi-a-GCST90017055	finn-b-N14_URINOTH	Other diseases of urinary system || id:finn-b-N14_URINOTH	|| id:ebi-a-GCST90017055	Inverse variance weighted	11	0.0209513	0.0460672	0.649255	-0.0693404	0.111243	1.02117	0.933009	1.11767	0.930726
ebi-a-GCST90017057	finn-b-N14_URINOTH	Other diseases of urinary system || id:finn-b-N14_URINOTH	|| id:ebi-a-GCST90017057	Inverse variance weighted	12	-0.0261252	0.0384451	0.496793	-0.101478	0.0492272	0.974213	0.903501	1.05046	0.930726
ebi-a-GCST90017065	finn-b-N14_URINOTH	Other diseases of urinary system || id:finn-b-N14_URINOTH	|| id:ebi-a-GCST90017065	Inverse variance weighted	12	-0.0148593	0.0359137	0.679057	-0.0852502	0.0555315	0.985251	0.918283	1.0571	0.930726
ebi-a-GCST90017067	finn-b-N14_URINOTH	Other diseases of urinary system || id:finn-b-N14_URINOTH	|| id:ebi-a-GCST90017067	Inverse variance weighted	9	0.0229351	0.0285128	0.421179	-0.03295	0.0788201	1.0232	0.967587	1.08201	0.930726
ebi-a-GCST90017072	finn-b-N14_URINOTH	Other diseases of urinary system || id:finn-b-N14_URINOTH	|| id:ebi-a-GCST90017072	Inverse variance weighted	12	-0.0356778	0.052743	0.498757	-0.139054	0.0676985	0.964951	0.870181	1.07004	0.930726
ebi-a-GCST90017078	finn-b-N14_URINOTH	Other diseases of urinary system || id:finn-b-N14_URINOTH	|| id:ebi-a-GCST90017078	Inverse variance weighted	13	-0.0273325	0.0527582	0.604409	-0.130739	0.0760737	0.973038	0.877447	1.07904	0.930726
ebi-a-GCST90017079	finn-b-N14_URINOTH	Other diseases of urinary system || id:finn-b-N14_URINOTH	|| id:ebi-a-GCST90017079	Inverse variance weighted	8	-0.0256353	0.0494965	0.604513	-0.122648	0.0713777	0.97469	0.884575	1.07399	0.930726
ebi-a-GCST90017083	finn-b-N14_URINOTH	Other diseases of urinary system || id:finn-b-N14_URINOTH	|| id:ebi-a-GCST90017083	Inverse variance weighted	12	0.0240109	0.0406469	0.554709	-0.0556571	0.103679	1.0243	0.945863	1.10924	0.930726
ebi-a-GCST90017089	finn-b-N14_URINOTH	Other diseases of urinary system || id:finn-b-N14_URINOTH	|| id:ebi-a-GCST90017089	Inverse variance weighted	10	-0.0131977	0.029974	0.659716	-0.0719468	0.0455514	0.986889	0.93058	1.0466	0.930726
ebi-a-GCST90017090	finn-b-N14_URINOTH	Other diseases of urinary system || id:finn-b-N14_URINOTH	|| id:ebi-a-GCST90017090	Inverse variance weighted	5	-0.0434467	0.0578193	0.452398	-0.156772	0.069879	0.957484	0.854899	1.07238	0.930726
ebi-a-GCST90017093	finn-b-N14_URINOTH	Other diseases of urinary system || id:finn-b-N14_URINOTH	|| id:ebi-a-GCST90017093	Inverse variance weighted	12	-0.0408902	0.0599442	0.495151	-0.158381	0.0766003	0.959934	0.853525	1.07961	0.930726
ebi-a-GCST90017095	finn-b-N14_URINOTH	Other diseases of urinary system || id:finn-b-N14_URINOTH	|| id:ebi-a-GCST90017095	Inverse variance weighted	12	-0.0423053	0.0706879	0.54952	-0.180854	0.096243	0.958577	0.834558	1.10103	0.930726
ebi-a-GCST90017096	finn-b-N14_URINOTH	Other diseases of urinary system || id:finn-b-N14_URINOTH	|| id:ebi-a-GCST90017096	Inverse variance weighted	13	0.050243	0.0670214	0.453462	-0.0811189	0.181605	1.05153	0.922084	1.19914	0.930726
ebi-a-GCST90017097	finn-b-N14_URINOTH	Other diseases of urinary system || id:finn-b-N14_URINOTH	|| id:ebi-a-GCST90017097	Inverse variance weighted	12	-0.0387862	0.0617469	0.529907	-0.15981	0.0822377	0.961956	0.852306	1.08571	0.930726
ebi-a-GCST90017103	finn-b-N14_URINOTH	Other diseases of urinary system || id:finn-b-N14_URINOTH	|| id:ebi-a-GCST90017103	Inverse variance weighted	13	-0.0273325	0.0527582	0.604409	-0.130739	0.0760737	0.973038	0.877447	1.07904	0.930726
ebi-a-GCST90017105	finn-b-N14_URINOTH	Other diseases of urinary system || id:finn-b-N14_URINOTH	|| id:ebi-a-GCST90017105	Inverse variance weighted	14	-0.0163033	0.0360122	0.650754	-0.0868872	0.0542806	0.983829	0.916781	1.05578	0.930726
ebi-a-GCST90017107	finn-b-N14_URINOTH	Other diseases of urinary system || id:finn-b-N14_URINOTH	|| id:ebi-a-GCST90017107	Inverse variance weighted	12	-0.0365306	0.0825537	0.658122	-0.198336	0.125275	0.964129	0.820094	1.13346	0.930726
ebi-a-GCST90017109	finn-b-N14_URINOTH	Other diseases of urinary system || id:finn-b-N14_URINOTH	|| id:ebi-a-GCST90017109	Inverse variance weighted	8	0.0170995	0.0382445	0.654795	-0.0578596	0.0920587	1.01725	0.943782	1.09643	0.930726
ebi-a-GCST90017111	finn-b-N14_URINOTH	Other diseases of urinary system || id:finn-b-N14_URINOTH	|| id:ebi-a-GCST90017111	Inverse variance weighted	11	-0.0452308	0.0617511	0.463882	-0.166263	0.0758013	0.955777	0.846824	1.07875	0.930726
ebi-a-GCST90017116	finn-b-N14_URINOTH	Other diseases of urinary system || id:finn-b-N14_URINOTH	|| id:ebi-a-GCST90017116	Inverse variance weighted	12	-0.0350513	0.0573363	0.540983	-0.14743	0.0773279	0.965556	0.862922	1.0804	0.930726
ebi-a-GCST90017118	finn-b-N14_URINOTH	Other diseases of urinary system || id:finn-b-N14_URINOTH	|| id:ebi-a-GCST90017118	Inverse variance weighted	12	-0.0346503	0.0546411	0.525987	-0.141747	0.0724462	0.965943	0.867841	1.07513	0.930726
ebi-a-GCST90016953	finn-b-N14_URINOTH	Other diseases of urinary system || id:finn-b-N14_URINOTH	|| id:ebi-a-GCST90016953	Inverse variance weighted	9	-0.013805	0.0404391	0.73282	-0.0930656	0.0654556	0.98629	0.911134	1.06765	0.946748
ebi-a-GCST90016973	finn-b-N14_URINOTH	Other diseases of urinary system || id:finn-b-N14_URINOTH	|| id:ebi-a-GCST90016973	Inverse variance weighted	8	-0.0223545	0.0635469	0.725003	-0.146906	0.102197	0.977893	0.863375	1.1076	0.946748
ebi-a-GCST90017005	finn-b-N14_URINOTH	Other diseases of urinary system || id:finn-b-N14_URINOTH	|| id:ebi-a-GCST90017005	Inverse variance weighted	15	-0.0184425	0.051154	0.718451	-0.118704	0.0818194	0.981726	0.88807	1.08526	0.946748
ebi-a-GCST90017051	finn-b-N14_URINOTH	Other diseases of urinary system || id:finn-b-N14_URINOTH	|| id:ebi-a-GCST90017051	Inverse variance weighted	8	-0.0271068	0.0733964	0.711889	-0.170964	0.11675	0.973257	0.842852	1.12384	0.946748
ebi-a-GCST90017077	finn-b-N14_URINOTH	Other diseases of urinary system || id:finn-b-N14_URINOTH	|| id:ebi-a-GCST90017077	Inverse variance weighted	9	-0.013805	0.0404391	0.73282	-0.0930656	0.0654556	0.98629	0.911134	1.06765	0.946748
ebi-a-GCST90017100	finn-b-N14_URINOTH	Other diseases of urinary system || id:finn-b-N14_URINOTH	|| id:ebi-a-GCST90017100	Inverse variance weighted	9	-0.013805	0.0404391	0.73282	-0.0930656	0.0654556	0.98629	0.911134	1.06765	0.946748
ebi-a-GCST90017114	finn-b-N14_URINOTH	Other diseases of urinary system || id:finn-b-N14_URINOTH	|| id:ebi-a-GCST90017114	Inverse variance weighted	15	0.0193991	0.0554716	0.726555	-0.0893252	0.128123	1.01959	0.914548	1.13669	0.946748
ebi-a-GCST90016974	finn-b-N14_URINOTH	Other diseases of urinary system || id:finn-b-N14_URINOTH	|| id:ebi-a-GCST90016974	Inverse variance weighted	13	0.0157726	0.0481365	0.743167	-0.078575	0.11012	1.0159	0.924433	1.11641	0.948335
ebi-a-GCST90017015	finn-b-N14_URINOTH	Other diseases of urinary system || id:finn-b-N14_URINOTH	|| id:ebi-a-GCST90017015	Inverse variance weighted	14	-0.0149564	0.0454448	0.742072	-0.104028	0.0741155	0.985155	0.9012	1.07693	0.948335
ebi-a-GCST90017008	finn-b-N14_URINOTH	Other diseases of urinary system || id:finn-b-N14_URINOTH	|| id:ebi-a-GCST90017008	Inverse variance weighted	13	0.0167024	0.052323	0.749562	-0.0858506	0.119255	1.01684	0.917731	1.12666	0.950664
ebi-a-GCST90016964	finn-b-N14_URINOTH	Other diseases of urinary system || id:finn-b-N14_URINOTH	|| id:ebi-a-GCST90016964	Inverse variance weighted	6	0.0123525	0.0394596	0.754249	-0.0649883	0.0896932	1.01243	0.937078	1.09384	0.950811
ebi-a-GCST90017046	finn-b-N14_URINOTH	Other diseases of urinary system || id:finn-b-N14_URINOTH	|| id:ebi-a-GCST90017046	Inverse variance weighted	11	-0.0127304	0.0415146	0.759111	-0.0940989	0.0686381	0.98735	0.910193	1.07105	0.951175
ebi-a-GCST90016919	finn-b-N14_URINOTH	Other diseases of urinary system || id:finn-b-N14_URINOTH	|| id:ebi-a-GCST90016919	Inverse variance weighted	10	-0.0103398	0.0385674	0.788624	-0.085932	0.0652523	0.989713	0.917657	1.06743	0.975145
ebi-a-GCST90017009	finn-b-N14_URINOTH	Other diseases of urinary system || id:finn-b-N14_URINOTH	|| id:ebi-a-GCST90017009	Inverse variance weighted	8	0.0159776	0.0604581	0.791567	-0.10252	0.134475	1.01611	0.90256	1.14394	0.975145
ebi-a-GCST90017066	finn-b-N14_URINOTH	Other diseases of urinary system || id:finn-b-N14_URINOTH	|| id:ebi-a-GCST90017066	Inverse variance weighted	9	0.02113	0.0802452	0.792306	-0.136151	0.178411	1.02135	0.872711	1.19532	0.975145
ebi-a-GCST90016913	finn-b-N14_URINOTH	Other diseases of urinary system || id:finn-b-N14_URINOTH	|| id:ebi-a-GCST90016913	Inverse variance weighted	11	0.0109748	0.0576741	0.849081	-0.102066	0.124016	1.01104	0.90297	1.13203	0.97816
ebi-a-GCST90016915	finn-b-N14_URINOTH	Other diseases of urinary system || id:finn-b-N14_URINOTH	|| id:ebi-a-GCST90016915	Inverse variance weighted	13	-0.0114681	0.0637565	0.857252	-0.136431	0.113495	0.988597	0.872467	1.12019	0.97816
ebi-a-GCST90016932	finn-b-N14_URINOTH	Other diseases of urinary system || id:finn-b-N14_URINOTH	|| id:ebi-a-GCST90016932	Inverse variance weighted	15	-0.00869067	0.040138	0.828583	-0.0873612	0.0699799	0.991347	0.916346	1.07249	0.97816
ebi-a-GCST90016952	finn-b-N14_URINOTH	Other diseases of urinary system || id:finn-b-N14_URINOTH	|| id:ebi-a-GCST90016952	Inverse variance weighted	13	-0.0103909	0.0591666	0.860592	-0.126357	0.105576	0.989663	0.8813	1.11135	0.97816
ebi-a-GCST90016997	finn-b-N14_URINOTH	Other diseases of urinary system || id:finn-b-N14_URINOTH	|| id:ebi-a-GCST90016997	Inverse variance weighted	13	-0.0130784	0.0594674	0.82593	-0.129634	0.103478	0.987007	0.878416	1.10902	0.97816
ebi-a-GCST90016998	finn-b-N14_URINOTH	Other diseases of urinary system || id:finn-b-N14_URINOTH	|| id:ebi-a-GCST90016998	Inverse variance weighted	6	0.0169055	0.0767803	0.825731	-0.133584	0.167395	1.01705	0.874954	1.18222	0.97816
ebi-a-GCST90017012	finn-b-N14_URINOTH	Other diseases of urinary system || id:finn-b-N14_URINOTH	|| id:ebi-a-GCST90017012	Inverse variance weighted	12	0.00580979	0.0309365	0.851035	-0.0548257	0.0664453	1.00583	0.94665	1.0687	0.97816
ebi-a-GCST90017026	finn-b-N14_URINOTH	Other diseases of urinary system || id:finn-b-N14_URINOTH	|| id:ebi-a-GCST90017026	Inverse variance weighted	12	-0.0140896	0.0562581	0.802242	-0.124356	0.0961763	0.986009	0.883066	1.10095	0.97816
ebi-a-GCST90017033	finn-b-N14_URINOTH	Other diseases of urinary system || id:finn-b-N14_URINOTH	|| id:ebi-a-GCST90017033	Inverse variance weighted	6	0.00852813	0.0416818	0.837884	-0.0731682	0.0902245	1.00856	0.929444	1.09442	0.97816
ebi-a-GCST90017061	finn-b-N14_URINOTH	Other diseases of urinary system || id:finn-b-N14_URINOTH	|| id:ebi-a-GCST90017061	Inverse variance weighted	11	-0.0100795	0.0506503	0.842261	-0.109354	0.0891951	0.989971	0.896413	1.09329	0.97816
ebi-a-GCST90017064	finn-b-N14_URINOTH	Other diseases of urinary system || id:finn-b-N14_URINOTH	|| id:ebi-a-GCST90017064	Inverse variance weighted	12	-0.0123049	0.0512274	0.810174	-0.112711	0.0881008	0.98777	0.893409	1.0921	0.97816
ebi-a-GCST90017074	finn-b-N14_URINOTH	Other diseases of urinary system || id:finn-b-N14_URINOTH	|| id:ebi-a-GCST90017074	Inverse variance weighted	10	0.0083555	0.0455868	0.854572	-0.0809947	0.0977057	1.00839	0.922199	1.10264	0.97816
ebi-a-GCST90017076	finn-b-N14_URINOTH	Other diseases of urinary system || id:finn-b-N14_URINOTH	|| id:ebi-a-GCST90017076	Inverse variance weighted	15	-0.00869067	0.040138	0.828583	-0.0873612	0.0699799	0.991347	0.916346	1.07249	0.97816
ebi-a-GCST90017115	finn-b-N14_URINOTH	Other diseases of urinary system || id:finn-b-N14_URINOTH	|| id:ebi-a-GCST90017115	Inverse variance weighted	9	0.0076577	0.0358066	0.830654	-0.0625233	0.0778387	1.00769	0.939391	1.08095	0.97816
ebi-a-GCST90016912	finn-b-N14_URINOTH	Other diseases of urinary system || id:finn-b-N14_URINOTH	|| id:ebi-a-GCST90016912	Inverse variance weighted	11	-0.00697906	0.0601273	0.907596	-0.124829	0.11087	0.993045	0.882648	1.11725	0.98934
ebi-a-GCST90016926	finn-b-N14_URINOTH	Other diseases of urinary system || id:finn-b-N14_URINOTH	|| id:ebi-a-GCST90016926	Inverse variance weighted	11	-0.00129567	0.062791	0.983537	-0.124366	0.121775	0.998705	0.883057	1.1295	0.98934
ebi-a-GCST90016927	finn-b-N14_URINOTH	Other diseases of urinary system || id:finn-b-N14_URINOTH	|| id:ebi-a-GCST90016927	Inverse variance weighted	9	-0.00540378	0.0669422	0.935662	-0.13661	0.125803	0.994611	0.87231	1.13406	0.98934
ebi-a-GCST90016934	finn-b-N14_URINOTH	Other diseases of urinary system || id:finn-b-N14_URINOTH	|| id:ebi-a-GCST90016934	Inverse variance weighted	11	0.00250106	0.0444025	0.955081	-0.0845278	0.0895299	1.0025	0.918946	1.09366	0.98934
ebi-a-GCST90016939	finn-b-N14_URINOTH	Other diseases of urinary system || id:finn-b-N14_URINOTH	|| id:ebi-a-GCST90016939	Inverse variance weighted	9	0.00542608	0.0692652	0.937559	-0.130334	0.141186	1.00544	0.877802	1.15164	0.98934
ebi-a-GCST90016945	finn-b-N14_URINOTH	Other diseases of urinary system || id:finn-b-N14_URINOTH	|| id:ebi-a-GCST90016945	Inverse variance weighted	9	0.000689399	0.0499776	0.988994	-0.0972668	0.0986456	1.00069	0.907314	1.10368	0.98934
ebi-a-GCST90016946	finn-b-N14_URINOTH	Other diseases of urinary system || id:finn-b-N14_URINOTH	|| id:ebi-a-GCST90016946	Inverse variance weighted	13	-0.00497951	0.0569308	0.930301	-0.116564	0.106605	0.995033	0.889973	1.11249	0.98934
ebi-a-GCST90016960	finn-b-N14_URINOTH	Other diseases of urinary system || id:finn-b-N14_URINOTH	|| id:ebi-a-GCST90016960	Inverse variance weighted	8	-0.00381433	0.0561014	0.945794	-0.113773	0.106144	0.996193	0.892461	1.11198	0.98934
ebi-a-GCST90016968	finn-b-N14_URINOTH	Other diseases of urinary system || id:finn-b-N14_URINOTH	|| id:ebi-a-GCST90016968	Inverse variance weighted	9	-0.00540378	0.0669422	0.935662	-0.13661	0.125803	0.994611	0.87231	1.13406	0.98934
ebi-a-GCST90016970	finn-b-N14_URINOTH	Other diseases of urinary system || id:finn-b-N14_URINOTH	|| id:ebi-a-GCST90016970	Inverse variance weighted	13	-0.00285516	0.0566873	0.95983	-0.113962	0.108252	0.997149	0.892292	1.11433	0.98934
ebi-a-GCST90016979	finn-b-N14_URINOTH	Other diseases of urinary system || id:finn-b-N14_URINOTH	|| id:ebi-a-GCST90016979	Inverse variance weighted	9	0.00615335	0.0419053	0.883259	-0.075981	0.0882877	1.00617	0.926834	1.0923	0.98934
ebi-a-GCST90016981	finn-b-N14_URINOTH	Other diseases of urinary system || id:finn-b-N14_URINOTH	|| id:ebi-a-GCST90016981	Inverse variance weighted	9	0.00299551	0.0878369	0.972795	-0.169165	0.175156	1.003	0.84437	1.19143	0.98934
ebi-a-GCST90016990	finn-b-N14_URINOTH	Other diseases of urinary system || id:finn-b-N14_URINOTH	|| id:ebi-a-GCST90016990	Inverse variance weighted	10	-0.00529483	0.0369376	0.886018	-0.0776926	0.0671029	0.994719	0.925249	1.06941	0.98934
ebi-a-GCST90016991	finn-b-N14_URINOTH	Other diseases of urinary system || id:finn-b-N14_URINOTH	|| id:ebi-a-GCST90016991	Inverse variance weighted	11	0.000900293	0.0356999	0.979881	-0.0690715	0.0708721	1.0009	0.93326	1.07344	0.98934
ebi-a-GCST90016999	finn-b-N14_URINOTH	Other diseases of urinary system || id:finn-b-N14_URINOTH	|| id:ebi-a-GCST90016999	Inverse variance weighted	9	-0.00368218	0.034366	0.914673	-0.0710395	0.0636752	0.996325	0.931425	1.06575	0.98934
ebi-a-GCST90017004	finn-b-N14_URINOTH	Other diseases of urinary system || id:finn-b-N14_URINOTH	|| id:ebi-a-GCST90017004	Inverse variance weighted	18	-0.00416539	0.0310977	0.893446	-0.0651169	0.0567861	0.995843	0.936958	1.05843	0.98934
ebi-a-GCST90017011	finn-b-N14_URINOTH	Other diseases of urinary system || id:finn-b-N14_URINOTH	|| id:ebi-a-GCST90017011	Inverse variance weighted	18	-0.00255355	0.0513503	0.960339	-0.1032	0.0980931	0.99745	0.901946	1.10307	0.98934
ebi-a-GCST90017020	finn-b-N14_URINOTH	Other diseases of urinary system || id:finn-b-N14_URINOTH	|| id:ebi-a-GCST90017020	Inverse variance weighted	13	-0.00142322	0.0566011	0.979939	-0.112361	0.109515	0.998578	0.893721	1.11574	0.98934
ebi-a-GCST90017037	finn-b-N14_URINOTH	Other diseases of urinary system || id:finn-b-N14_URINOTH	|| id:ebi-a-GCST90017037	Inverse variance weighted	8	-0.00486111	0.0548883	0.929429	-0.112442	0.10272	0.995151	0.893649	1.10818	0.98934
ebi-a-GCST90017039	finn-b-N14_URINOTH	Other diseases of urinary system || id:finn-b-N14_URINOTH	|| id:ebi-a-GCST90017039	Inverse variance weighted	5	0.011727	0.113959	0.918038	-0.211633	0.235087	1.0118	0.809262	1.26502	0.98934
ebi-a-GCST90017070	finn-b-N14_URINOTH	Other diseases of urinary system || id:finn-b-N14_URINOTH	|| id:ebi-a-GCST90017070	Inverse variance weighted	14	0.00118002	0.0539261	0.982542	-0.104515	0.106875	1.00118	0.900761	1.1128	0.98934
ebi-a-GCST90017073	finn-b-N14_URINOTH	Other diseases of urinary system || id:finn-b-N14_URINOTH	|| id:ebi-a-GCST90017073	Inverse variance weighted	5	-0.00673039	0.0733421	0.926883	-0.150481	0.13702	0.993292	0.860294	1.14685	0.98934
ebi-a-GCST90017087	finn-b-N14_URINOTH	Other diseases of urinary system || id:finn-b-N14_URINOTH	|| id:ebi-a-GCST90017087	Inverse variance weighted	11	-0.00134128	0.0327303	0.967312	-0.0654927	0.0628101	0.99866	0.936606	1.06482	0.98934
ebi-a-GCST90017094	finn-b-N14_URINOTH	Other diseases of urinary system || id:finn-b-N14_URINOTH	|| id:ebi-a-GCST90017094	Inverse variance weighted	10	0.00905961	0.0624907	0.88473	-0.113422	0.131541	1.0091	0.892774	1.14059	0.98934
ebi-a-GCST90017112	finn-b-N14_URINOTH	Other diseases of urinary system || id:finn-b-N14_URINOTH	|| id:ebi-a-GCST90017112	Inverse variance weighted	8	0.000866003	0.0648197	0.98934	-0.126181	0.127913	1.00087	0.881456	1.13645	0.98934

## Sheet: UTI & Gut Microbiota SNP
SNP	effect_allele.outcome	other_allele.outcome	beta.outcome	se.outcome	pval.outcome	outcome	eaf.outcome	id.outcome
rs12509763	C	G	-0.0191	0.0178	0.2818	Other diseases of urinary system || id:finn-b-N14_URINOTH	0.09554	finn-b-N14_URINOTH
rs17051335	C	T	-0.0041	0.0172	0.8113	Other diseases of urinary system || id:finn-b-N14_URINOTH	0.1022	finn-b-N14_URINOTH
rs11098863	A	T	-0.0039	0.0105	0.708	Other diseases of urinary system || id:finn-b-N14_URINOTH	0.5209	finn-b-N14_URINOTH
rs2731794	C	T	-0.0064	0.029	0.8239	Other diseases of urinary system || id:finn-b-N14_URINOTH	0.03417	finn-b-N14_URINOTH
rs2561116	T	G	-0.0012	0.0223	0.957	Other diseases of urinary system || id:finn-b-N14_URINOTH	0.05833	finn-b-N14_URINOTH
rs56405618	A	G	-0.0006	0.0164	0.973	Other diseases of urinary system || id:finn-b-N14_URINOTH	0.1156	finn-b-N14_URINOTH
rs1425962	C	G	0.0084	0.0107	0.4333	Other diseases of urinary system || id:finn-b-N14_URINOTH	0.599	finn-b-N14_URINOTH
rs28889936	A	C	0.0297	0.0177	0.0937907	Other diseases of urinary system || id:finn-b-N14_URINOTH	0.09572	finn-b-N14_URINOTH
rs336138	G	T	-0.0187	0.0163	0.2501	Other diseases of urinary system || id:finn-b-N14_URINOTH	0.1153	finn-b-N14_URINOTH
rs13173038	A	G	-0.0099	0.0121	0.4108	Other diseases of urinary system || id:finn-b-N14_URINOTH	0.248	finn-b-N14_URINOTH
rs4690582	T	C	0.0104	0.0107	0.3275	Other diseases of urinary system || id:finn-b-N14_URINOTH	0.5993	finn-b-N14_URINOTH
rs80046645	C	G	-0.0298	0.0273	0.2744	Other diseases of urinary system || id:finn-b-N14_URINOTH	0.03834	finn-b-N14_URINOTH
rs16863365	A	G	0.0509	0.0247	0.03904	Other diseases of urinary system || id:finn-b-N14_URINOTH	0.04704	finn-b-N14_URINOTH
rs6755871	C	G	-0.0034	0.0104	0.748201	Other diseases of urinary system || id:finn-b-N14_URINOTH	0.4867	finn-b-N14_URINOTH
rs4429415	C	T	0.0116	0.0105	0.2677	Other diseases of urinary system || id:finn-b-N14_URINOTH	0.4453	finn-b-N14_URINOTH
rs2396460	C	T	0.0033	0.0105	0.753199	Other diseases of urinary system || id:finn-b-N14_URINOTH	0.5145	finn-b-N14_URINOTH
rs80124826	T	C	0.0259	0.0323	0.424	Other diseases of urinary system || id:finn-b-N14_URINOTH	0.02721	finn-b-N14_URINOTH
rs4033856	T	C	0.0066	0.0186	0.723701	Other diseases of urinary system || id:finn-b-N14_URINOTH	0.9137	finn-b-N14_URINOTH
rs2569953	C	A	-0.0046	0.0106	0.6622	Other diseases of urinary system || id:finn-b-N14_URINOTH	0.5848	finn-b-N14_URINOTH
rs56069061	G	A	0.0195	0.021	0.3535	Other diseases of urinary system || id:finn-b-N14_URINOTH	0.06797	finn-b-N14_URINOTH
rs62285313	A	G	-0.0059	0.0176	0.7395	Other diseases of urinary system || id:finn-b-N14_URINOTH	0.09806	finn-b-N14_URINOTH
rs12636310	G	A	-0.0082	0.012	0.4978	Other diseases of urinary system || id:finn-b-N14_URINOTH	0.2515	finn-b-N14_URINOTH
rs2276760	A	G	-0.0181	0.0122	0.1387	Other diseases of urinary system || id:finn-b-N14_URINOTH	0.2394	finn-b-N14_URINOTH
rs7616165	G	T	-0.0175	0.0333	0.5993	Other diseases of urinary system || id:finn-b-N14_URINOTH	0.02489	finn-b-N14_URINOTH
rs73167075	T	C	-0.0064	0.0128	0.6179	Other diseases of urinary system || id:finn-b-N14_URINOTH	0.21	finn-b-N14_URINOTH
rs2863363	G	A	-0.0066	0.0121	0.5829	Other diseases of urinary system || id:finn-b-N14_URINOTH	0.7554	finn-b-N14_URINOTH
rs115602804	G	A	0.0014	0.0169	0.9342	Other diseases of urinary system || id:finn-b-N14_URINOTH	0.1073	finn-b-N14_URINOTH
rs143762454	C	T	0.0179	0.0251	0.4754	Other diseases of urinary system || id:finn-b-N14_URINOTH	0.04674	finn-b-N14_URINOTH
rs61791565	T	C	-0.0049	0.0105	0.6381	Other diseases of urinary system || id:finn-b-N14_URINOTH	0.5063	finn-b-N14_URINOTH
rs73139353	A	C	-0.0328	0.0187	0.0795097	Other diseases of urinary system || id:finn-b-N14_URINOTH	0.08797	finn-b-N14_URINOTH
rs4243434	G	T	-0.0262	0.0226	0.2476	Other diseases of urinary system || id:finn-b-N14_URINOTH	0.9435	finn-b-N14_URINOTH
rs6797051	C	T	0.0066	0.0178	0.709499	Other diseases of urinary system || id:finn-b-N14_URINOTH	0.09468	finn-b-N14_URINOTH
rs73846128	A	G	0.0184	0.0146	0.2074	Other diseases of urinary system || id:finn-b-N14_URINOTH	0.1486	finn-b-N14_URINOTH
rs76898927	G	A	-0.0215	0.0231	0.3518	Other diseases of urinary system || id:finn-b-N14_URINOTH	0.05376	finn-b-N14_URINOTH
rs6795673	C	T	0.0162	0.0104	0.1208	Other diseases of urinary system || id:finn-b-N14_URINOTH	0.4785	finn-b-N14_URINOTH
rs6550240	A	G	0.0015	0.0168	0.9307	Other diseases of urinary system || id:finn-b-N14_URINOTH	0.8862	finn-b-N14_URINOTH
rs6704822	G	A	0.0058	0.0154	0.708	Other diseases of urinary system || id:finn-b-N14_URINOTH	0.8696	finn-b-N14_URINOTH
rs1990708	A	C	-0.0316	0.0194	0.1023	Other diseases of urinary system || id:finn-b-N14_URINOTH	0.07852	finn-b-N14_URINOTH
rs78613526	G	A	0.0194	0.024	0.4192	Other diseases of urinary system || id:finn-b-N14_URINOTH	0.05256	finn-b-N14_URINOTH
rs4493272	T	C	0.0152	0.0105	0.147	Other diseases of urinary system || id:finn-b-N14_URINOTH	0.4772	finn-b-N14_URINOTH
rs56080211	T	C	-0.0034	0.0197	0.8641	Other diseases of urinary system || id:finn-b-N14_URINOTH	0.9221	finn-b-N14_URINOTH
rs9426473	A	G	-0.0112	0.0119	0.3459	Other diseases of urinary system || id:finn-b-N14_URINOTH	0.2579	finn-b-N14_URINOTH
rs10927423	C	A	0.0313	0.0136	0.0216302	Other diseases of urinary system || id:finn-b-N14_URINOTH	0.1782	finn-b-N14_URINOTH
rs12031543	T	C	0.0142	0.0153	0.3534	Other diseases of urinary system || id:finn-b-N14_URINOTH	0.1386	finn-b-N14_URINOTH
rs290772	G	A	-0.0501	0.0232	0.0307298	Other diseases of urinary system || id:finn-b-N14_URINOTH	0.05372	finn-b-N14_URINOTH
rs73002572	G	C	-0.0193	0.0164	0.2393	Other diseases of urinary system || id:finn-b-N14_URINOTH	0.1166	finn-b-N14_URINOTH
rs12034718	G	A	-0.0051	0.0125	0.6846	Other diseases of urinary system || id:finn-b-N14_URINOTH	0.7764	finn-b-N14_URINOTH
rs2054133	A	G	-0.0101	0.011	0.3563	Other diseases of urinary system || id:finn-b-N14_URINOTH	0.6345	finn-b-N14_URINOTH
rs9460691	C	A	-0.0203	0.0133	0.1282	Other diseases of urinary system || id:finn-b-N14_URINOTH	0.195	finn-b-N14_URINOTH
rs13207588	A	G	-0.0006	0.0134	0.9618	Other diseases of urinary system || id:finn-b-N14_URINOTH	0.1954	finn-b-N14_URINOTH
rs6930661	C	T	-0.0043	0.0219	0.8442	Other diseases of urinary system || id:finn-b-N14_URINOTH	0.06097	finn-b-N14_URINOTH
rs857444	C	T	0.011	0.0108	0.3082	Other diseases of urinary system || id:finn-b-N14_URINOTH	0.3686	finn-b-N14_URINOTH
rs233486	G	A	-0.0029	0.015	0.8492	Other diseases of urinary system || id:finn-b-N14_URINOTH	0.8601	finn-b-N14_URINOTH
rs34583783	G	T	0.0105	0.0219	0.6316	Other diseases of urinary system || id:finn-b-N14_URINOTH	0.0607	finn-b-N14_URINOTH
rs72821405	T	C	0.0068	0.0186	0.7145	Other diseases of urinary system || id:finn-b-N14_URINOTH	0.08919	finn-b-N14_URINOTH
rs9382510	C	T	-0.0163	0.0118	0.1669	Other diseases of urinary system || id:finn-b-N14_URINOTH	0.2649	finn-b-N14_URINOTH
rs6934519	C	T	0.0071	0.0119	0.5526	Other diseases of urinary system || id:finn-b-N14_URINOTH	0.2574	finn-b-N14_URINOTH
rs6909981	C	T	-0.0001	0.016	0.9932	Other diseases of urinary system || id:finn-b-N14_URINOTH	0.1218	finn-b-N14_URINOTH
rs4895919	C	T	-0.0157	0.0105	0.1324	Other diseases of urinary system || id:finn-b-N14_URINOTH	0.5191	finn-b-N14_URINOTH
rs118526	A	C	0.0215	0.0114	0.0603101	Other diseases of urinary system || id:finn-b-N14_URINOTH	0.6995	finn-b-N14_URINOTH
rs1035406	G	A	0.0009	0.0162	0.9576	Other diseases of urinary system || id:finn-b-N14_URINOTH	0.1161	finn-b-N14_URINOTH
rs6875660	C	T	0.0198	0.0218	0.363	Other diseases of urinary system || id:finn-b-N14_URINOTH	0.06093	finn-b-N14_URINOTH
rs329182	T	C	-0.0093	0.0142	0.5117	Other diseases of urinary system || id:finn-b-N14_URINOTH	0.1606	finn-b-N14_URINOTH
rs1842454	G	A	-0.0224	0.0134	0.0942801	Other diseases of urinary system || id:finn-b-N14_URINOTH	0.1876	finn-b-N14_URINOTH
rs4146507	C	T	-0.0149	0.0122	0.2216	Other diseases of urinary system || id:finn-b-N14_URINOTH	0.2446	finn-b-N14_URINOTH
rs113859143	G	C	0.0102	0.0226	0.651	Other diseases of urinary system || id:finn-b-N14_URINOTH	0.05653	finn-b-N14_URINOTH
rs1901739	G	T	0.0024	0.0104	0.8176	Other diseases of urinary system || id:finn-b-N14_URINOTH	0.4629	finn-b-N14_URINOTH
rs1549633	A	C	0.011	0.0163	0.5021	Other diseases of urinary system || id:finn-b-N14_URINOTH	0.1158	finn-b-N14_URINOTH
rs12522517	A	T	0.0179	0.0148	0.2269	Other diseases of urinary system || id:finn-b-N14_URINOTH	0.1525	finn-b-N14_URINOTH
rs2910921	C	T	-0.0229	0.0312	0.4621	Other diseases of urinary system || id:finn-b-N14_URINOTH	0.9711	finn-b-N14_URINOTH
rs113753996	T	C	-0.0182	0.0135	0.1763	Other diseases of urinary system || id:finn-b-N14_URINOTH	0.1825	finn-b-N14_URINOTH
rs234108	A	G	0.0034	0.0106	0.746799	Other diseases of urinary system || id:finn-b-N14_URINOTH	0.3956	finn-b-N14_URINOTH
rs12022129	A	G	0.0052	0.0117	0.654699	Other diseases of urinary system || id:finn-b-N14_URINOTH	0.7249	finn-b-N14_URINOTH
rs12118202	T	C	-0.0049	0.0135	0.7163	Other diseases of urinary system || id:finn-b-N14_URINOTH	0.1815	finn-b-N14_URINOTH
rs12760724	A	C	-0.0033	0.0111	0.769699	Other diseases of urinary system || id:finn-b-N14_URINOTH	0.3285	finn-b-N14_URINOTH
rs2265670	C	G	-0.0157	0.0105	0.1324	Other diseases of urinary system || id:finn-b-N14_URINOTH	0.5348	finn-b-N14_URINOTH
rs6676699	T	G	-0.0036	0.0114	0.749799	Other diseases of urinary system || id:finn-b-N14_URINOTH	0.698	finn-b-N14_URINOTH
rs57872228	C	T	0.0065	0.0163	0.6896	Other diseases of urinary system || id:finn-b-N14_URINOTH	0.1166	finn-b-N14_URINOTH
rs72761829	A	T	0.0097	0.0185	0.6	Other diseases of urinary system || id:finn-b-N14_URINOTH	0.08913	finn-b-N14_URINOTH
rs11811696	T	C	-0.0232	0.019	0.2213	Other diseases of urinary system || id:finn-b-N14_URINOTH	0.08234	finn-b-N14_URINOTH
rs10495392	T	C	-0.0186	0.02	0.3522	Other diseases of urinary system || id:finn-b-N14_URINOTH	0.9265	finn-b-N14_URINOTH
rs9973954	G	A	0.0115	0.0109	0.292	Other diseases of urinary system || id:finn-b-N14_URINOTH	0.6436	finn-b-N14_URINOTH
rs893394	G	A	0.0008	0.0106	0.9385	Other diseases of urinary system || id:finn-b-N14_URINOTH	0.4531	finn-b-N14_URINOTH
rs10927394	G	T	-0.0156	0.0379	0.6805	Other diseases of urinary system || id:finn-b-N14_URINOTH	0.01932	finn-b-N14_URINOTH
rs67832247	C	T	-0.0316	0.0113	0.00510305	Other diseases of urinary system || id:finn-b-N14_URINOTH	0.3373	finn-b-N14_URINOTH
rs1361104	T	C	0.004	0.0118	0.7357	Other diseases of urinary system || id:finn-b-N14_URINOTH	0.2622	finn-b-N14_URINOTH
rs12036886	T	C	0.0376	0.0112	0.000786593	Other diseases of urinary system || id:finn-b-N14_URINOTH	0.3188	finn-b-N14_URINOTH
rs3765837	T	G	-0.0016	0.0203	0.9361	Other diseases of urinary system || id:finn-b-N14_URINOTH	0.07173	finn-b-N14_URINOTH
rs2788271	G	T	0.0186	0.0137	0.1755	Other diseases of urinary system || id:finn-b-N14_URINOTH	0.8271	finn-b-N14_URINOTH
rs75987356	G	A	0.0238	0.0197	0.2281	Other diseases of urinary system || id:finn-b-N14_URINOTH	0.07846	finn-b-N14_URINOTH
rs11899949	G	A	0.0078	0.0113	0.4884	Other diseases of urinary system || id:finn-b-N14_URINOTH	0.3118	finn-b-N14_URINOTH
rs488164	G	T	-0.0004	0.0109	0.9739	Other diseases of urinary system || id:finn-b-N14_URINOTH	0.6456	finn-b-N14_URINOTH
rs3819978	C	T	-0.0027	0.0196	0.889	Other diseases of urinary system || id:finn-b-N14_URINOTH	0.07763	finn-b-N14_URINOTH
rs79656633	T	C	0	0.0174	0.9998	Other diseases of urinary system || id:finn-b-N14_URINOTH	0.1008	finn-b-N14_URINOTH
rs12136548	C	T	0.0029	0.0115	0.8022	Other diseases of urinary system || id:finn-b-N14_URINOTH	0.2869	finn-b-N14_URINOTH
rs78250280	G	A	-0.0088	0.015	0.5563	Other diseases of urinary system || id:finn-b-N14_URINOTH	0.1419	finn-b-N14_URINOTH
rs11184341	C	G	-0.0051	0.0117	0.6633	Other diseases of urinary system || id:finn-b-N14_URINOTH	0.7255	finn-b-N14_URINOTH
rs76724913	T	G	-0.0041	0.0177	0.8178	Other diseases of urinary system || id:finn-b-N14_URINOTH	0.09748	finn-b-N14_URINOTH
rs115372687	A	G	0.0022	0.0185	0.9058	Other diseases of urinary system || id:finn-b-N14_URINOTH	0.08731	finn-b-N14_URINOTH
rs45598138	C	A	0.01	0.0334	0.765399	Other diseases of urinary system || id:finn-b-N14_URINOTH	0.02514	finn-b-N14_URINOTH
rs61771805	A	T	0.0249	0.0164	0.1274	Other diseases of urinary system || id:finn-b-N14_URINOTH	0.1159	finn-b-N14_URINOTH
rs12753492	A	C	0.0012	0.0166	0.9402	Other diseases of urinary system || id:finn-b-N14_URINOTH	0.1126	finn-b-N14_URINOTH
rs12049454	T	C	-0.0022	0.0107	0.8342	Other diseases of urinary system || id:finn-b-N14_URINOTH	0.3945	finn-b-N14_URINOTH
rs12079579	A	G	0.0084	0.0188	0.653899	Other diseases of urinary system || id:finn-b-N14_URINOTH	0.08456	finn-b-N14_URINOTH
rs12567789	G	A	-0.0042	0.0152	0.781801	Other diseases of urinary system || id:finn-b-N14_URINOTH	0.1357	finn-b-N14_URINOTH
rs12406309	A	C	0.0005	0.0126	0.9698	Other diseases of urinary system || id:finn-b-N14_URINOTH	0.221	finn-b-N14_URINOTH
rs12131224	C	T	-0.008	0.0168	0.636	Other diseases of urinary system || id:finn-b-N14_URINOTH	0.1089	finn-b-N14_URINOTH
rs345219	G	T	0.0114	0.0106	0.2806	Other diseases of urinary system || id:finn-b-N14_URINOTH	0.5299	finn-b-N14_URINOTH
rs6793778	T	C	-0.0106	0.0119	0.3717	Other diseases of urinary system || id:finn-b-N14_URINOTH	0.7398	finn-b-N14_URINOTH
rs13024781	T	C	0.0067	0.0105	0.5214	Other diseases of urinary system || id:finn-b-N14_URINOTH	0.5205	finn-b-N14_URINOTH
rs72982915	C	T	0.0199	0.0226	0.3798	Other diseases of urinary system || id:finn-b-N14_URINOTH	0.05644	finn-b-N14_URINOTH
rs56221232	T	C	-0.0093	0.0174	0.5943	Other diseases of urinary system || id:finn-b-N14_URINOTH	0.1003	finn-b-N14_URINOTH
rs6431586	A	G	-0.0163	0.019	0.3918	Other diseases of urinary system || id:finn-b-N14_URINOTH	0.084	finn-b-N14_URINOTH
rs11890098	A	G	-0.0043	0.0116	0.7089	Other diseases of urinary system || id:finn-b-N14_URINOTH	0.2781	finn-b-N14_URINOTH
rs6744030	C	T	0.003	0.0128	0.8134	Other diseases of urinary system || id:finn-b-N14_URINOTH	0.214	finn-b-N14_URINOTH
rs12990744	C	T	0.0096	0.0173	0.5813	Other diseases of urinary system || id:finn-b-N14_URINOTH	0.1029	finn-b-N14_URINOTH
rs78383039	T	C	-0.0152	0.0265	0.5673	Other diseases of urinary system || id:finn-b-N14_URINOTH	0.04085	finn-b-N14_URINOTH
rs12467198	C	T	-0.0106	0.0105	0.3129	Other diseases of urinary system || id:finn-b-N14_URINOTH	0.4478	finn-b-N14_URINOTH
rs12996055	A	C	-0.0015	0.0119	0.8992	Other diseases of urinary system || id:finn-b-N14_URINOTH	0.2681	finn-b-N14_URINOTH
rs2032750	C	T	-0.0159	0.0105	0.1291	Other diseases of urinary system || id:finn-b-N14_URINOTH	0.5387	finn-b-N14_URINOTH
rs2293361	C	T	-0.0492	0.0232	0.0337	Other diseases of urinary system || id:finn-b-N14_URINOTH	0.05379	finn-b-N14_URINOTH
rs12992764	T	G	-0.0034	0.0106	0.7511	Other diseases of urinary system || id:finn-b-N14_URINOTH	0.4299	finn-b-N14_URINOTH
rs79598899	C	T	0.0019	0.0249	0.9407	Other diseases of urinary system || id:finn-b-N14_URINOTH	0.04737	finn-b-N14_URINOTH
rs73038677	T	A	0.0001	0.0152	0.9933	Other diseases of urinary system || id:finn-b-N14_URINOTH	0.138	finn-b-N14_URINOTH
rs12634826	T	G	-0.0009	0.0109	0.9364	Other diseases of urinary system || id:finn-b-N14_URINOTH	0.3818	finn-b-N14_URINOTH
rs4687132	G	A	0.0025	0.0109	0.8161	Other diseases of urinary system || id:finn-b-N14_URINOTH	0.3486	finn-b-N14_URINOTH
rs55719207	G	A	0.0131	0.0107	0.224	Other diseases of urinary system || id:finn-b-N14_URINOTH	0.4021	finn-b-N14_URINOTH
rs9308097	G	A	0.0012	0.0104	0.9108	Other diseases of urinary system || id:finn-b-N14_URINOTH	0.5066	finn-b-N14_URINOTH
rs2322265	C	T	-0.0227	0.0119	0.05643	Other diseases of urinary system || id:finn-b-N14_URINOTH	0.2651	finn-b-N14_URINOTH
rs12696594	G	A	0.0064	0.0105	0.5407	Other diseases of urinary system || id:finn-b-N14_URINOTH	0.5526	finn-b-N14_URINOTH
rs17380632	A	T	-0.0026	0.0123	0.8308	Other diseases of urinary system || id:finn-b-N14_URINOTH	0.2329	finn-b-N14_URINOTH
rs4862235	A	G	0.005	0.0105	0.635501	Other diseases of urinary system || id:finn-b-N14_URINOTH	0.5453	finn-b-N14_URINOTH
rs36057338	G	T	0.0459	0.0292	0.1169	Other diseases of urinary system || id:finn-b-N14_URINOTH	0.03308	finn-b-N14_URINOTH
rs249459	A	G	-0.0027	0.011	0.8072	Other diseases of urinary system || id:finn-b-N14_URINOTH	0.3497	finn-b-N14_URINOTH
rs76847269	A	G	-0.0045	0.0331	0.8907	Other diseases of urinary system || id:finn-b-N14_URINOTH	0.02589	finn-b-N14_URINOTH
rs7725895	A	G	0.0221	0.0161	0.1685	Other diseases of urinary system || id:finn-b-N14_URINOTH	0.1202	finn-b-N14_URINOTH
rs447950	A	G	-0.0166	0.0108	0.1252	Other diseases of urinary system || id:finn-b-N14_URINOTH	0.3757	finn-b-N14_URINOTH
rs17081797	A	G	0.0093	0.0212	0.6617	Other diseases of urinary system || id:finn-b-N14_URINOTH	0.06468	finn-b-N14_URINOTH
rs2717140	C	T	0.0033	0.0175	0.849	Other diseases of urinary system || id:finn-b-N14_URINOTH	0.09851	finn-b-N14_URINOTH
rs7240324	T	G	-0.0134	0.0122	0.2709	Other diseases of urinary system || id:finn-b-N14_URINOTH	0.2457	finn-b-N14_URINOTH
rs7330827	T	C	-0.0284	0.0221	0.1973	Other diseases of urinary system || id:finn-b-N14_URINOTH	0.05964	finn-b-N14_URINOTH
rs9958960	G	A	0.0243	0.0144	0.0913293	Other diseases of urinary system || id:finn-b-N14_URINOTH	0.1536	finn-b-N14_URINOTH
rs112375806	T	A	-0.0055	0.0152	0.719201	Other diseases of urinary system || id:finn-b-N14_URINOTH	0.1402	finn-b-N14_URINOTH
rs540220	C	T	-0.0219	0.0183	0.2314	Other diseases of urinary system || id:finn-b-N14_URINOTH	0.9111	finn-b-N14_URINOTH
rs13291169	C	G	-0.0147	0.015	0.3266	Other diseases of urinary system || id:finn-b-N14_URINOTH	0.1423	finn-b-N14_URINOTH
rs10967781	C	A	-0.0065	0.0115	0.574	Other diseases of urinary system || id:finn-b-N14_URINOTH	0.2885	finn-b-N14_URINOTH
rs11787826	C	A	0.0013	0.0106	0.9021	Other diseases of urinary system || id:finn-b-N14_URINOTH	0.4085	finn-b-N14_URINOTH
rs62496417	T	G	0.0011	0.0127	0.9294	Other diseases of urinary system || id:finn-b-N14_URINOTH	0.2149	finn-b-N14_URINOTH
rs28564647	T	G	-0.0035	0.014	0.803	Other diseases of urinary system || id:finn-b-N14_URINOTH	0.1673	finn-b-N14_URINOTH
rs12731	A	G	0.0105	0.0107	0.328	Other diseases of urinary system || id:finn-b-N14_URINOTH	0.3793	finn-b-N14_URINOTH
rs10931481	A	G	0.0164	0.0115	0.154	Other diseases of urinary system || id:finn-b-N14_URINOTH	0.711	finn-b-N14_URINOTH
rs6761463	C	G	-0.0098	0.0152	0.5189	Other diseases of urinary system || id:finn-b-N14_URINOTH	0.8638	finn-b-N14_URINOTH
rs72809222	T	C	-0.0006	0.0128	0.9608	Other diseases of urinary system || id:finn-b-N14_URINOTH	0.2117	finn-b-N14_URINOTH
rs4797169	T	C	0.0141	0.0123	0.2532	Other diseases of urinary system || id:finn-b-N14_URINOTH	0.2368	finn-b-N14_URINOTH
rs59663348	G	A	0.0148	0.0121	0.221	Other diseases of urinary system || id:finn-b-N14_URINOTH	0.2463	finn-b-N14_URINOTH
rs206581	A	G	-0.0176	0.0127	0.1665	Other diseases of urinary system || id:finn-b-N14_URINOTH	0.217	finn-b-N14_URINOTH
rs7232121	G	C	-0.0046	0.0106	0.6609	Other diseases of urinary system || id:finn-b-N14_URINOTH	0.4858	finn-b-N14_URINOTH
rs75238760	T	A	0.0033	0.0155	0.831	Other diseases of urinary system || id:finn-b-N14_URINOTH	0.1321	finn-b-N14_URINOTH
rs16960159	C	G	-0.0331	0.0178	0.0626599	Other diseases of urinary system || id:finn-b-N14_URINOTH	0.09551	finn-b-N14_URINOTH
rs72915163	G	C	-0.1754	0.2745	0.522801	Other diseases of urinary system || id:finn-b-N14_URINOTH	0.0004724	finn-b-N14_URINOTH
rs11666533	C	T	0.0052	0.019	0.7863	Other diseases of urinary system || id:finn-b-N14_URINOTH	0.08441	finn-b-N14_URINOTH
rs10410917	C	T	-0.0006	0.0107	0.952	Other diseases of urinary system || id:finn-b-N14_URINOTH	0.3894	finn-b-N14_URINOTH
rs10404377	A	C	0.0077	0.0107	0.4756	Other diseases of urinary system || id:finn-b-N14_URINOTH	0.5794	finn-b-N14_URINOTH
rs646327	G	A	-0.0127	0.0106	0.2292	Other diseases of urinary system || id:finn-b-N14_URINOTH	0.409	finn-b-N14_URINOTH
rs136761	A	G	-0.0028	0.0109	0.7988	Other diseases of urinary system || id:finn-b-N14_URINOTH	0.6371	finn-b-N14_URINOTH
rs5746486	T	C	-0.0046	0.0107	0.664599	Other diseases of urinary system || id:finn-b-N14_URINOTH	0.3865	finn-b-N14_URINOTH
rs9608282	T	G	-0.0296	0.029	0.3079	Other diseases of urinary system || id:finn-b-N14_URINOTH	0.03371	finn-b-N14_URINOTH
rs9613196	T	A	-0.0714	0.0264	0.00675196	Other diseases of urinary system || id:finn-b-N14_URINOTH	0.04194	finn-b-N14_URINOTH
rs3890996	G	T	0.0027	0.0105	0.7958	Other diseases of urinary system || id:finn-b-N14_URINOTH	0.5363	finn-b-N14_URINOTH
rs2103510	G	A	0.0069	0.0163	0.6707	Other diseases of urinary system || id:finn-b-N14_URINOTH	0.1162	finn-b-N14_URINOTH
rs72714787	C	A	-0.0343	0.0154	0.02627	Other diseases of urinary system || id:finn-b-N14_URINOTH	0.1315	finn-b-N14_URINOTH
rs864093	A	C	-0.0032	0.0128	0.8033	Other diseases of urinary system || id:finn-b-N14_URINOTH	0.211	finn-b-N14_URINOTH
rs68104925	T	C	-0.0021	0.0113	0.8518	Other diseases of urinary system || id:finn-b-N14_URINOTH	0.3066	finn-b-N14_URINOTH
rs11181912	G	A	0.0089	0.0112	0.4269	Other diseases of urinary system || id:finn-b-N14_URINOTH	0.3231	finn-b-N14_URINOTH
rs912860	A	G	-0.0008	0.0345	0.9824	Other diseases of urinary system || id:finn-b-N14_URINOTH	0.9769	finn-b-N14_URINOTH
rs1271565	C	T	-0.0191	0.0119	0.107	Other diseases of urinary system || id:finn-b-N14_URINOTH	0.2613	finn-b-N14_URINOTH
rs72723662	C	T	-0.0423	0.0154	0.00589698	Other diseases of urinary system || id:finn-b-N14_URINOTH	0.1423	finn-b-N14_URINOTH
rs7400877	C	T	-0.0199	0.0127	0.1172	Other diseases of urinary system || id:finn-b-N14_URINOTH	0.7865	finn-b-N14_URINOTH
rs36095275	C	T	0.0038	0.0106	0.7229	Other diseases of urinary system || id:finn-b-N14_URINOTH	0.4175	finn-b-N14_URINOTH
rs74603314	T	C	0.0272	0.0269	0.3114	Other diseases of urinary system || id:finn-b-N14_URINOTH	0.04011	finn-b-N14_URINOTH
rs16940167	C	T	-0.0111	0.0133	0.402	Other diseases of urinary system || id:finn-b-N14_URINOTH	0.1908	finn-b-N14_URINOTH
rs1871858	C	G	0.0362	0.0165	0.0282898	Other diseases of urinary system || id:finn-b-N14_URINOTH	0.1117	finn-b-N14_URINOTH
rs115909738	A	C	-0.0142	0.0135	0.2933	Other diseases of urinary system || id:finn-b-N14_URINOTH	0.1808	finn-b-N14_URINOTH
rs503751	C	G	0.006	0.0104	0.562	Other diseases of urinary system || id:finn-b-N14_URINOTH	0.5274	finn-b-N14_URINOTH
rs74018587	C	T	-0.0274	0.0264	0.2999	Other diseases of urinary system || id:finn-b-N14_URINOTH	0.04046	finn-b-N14_URINOTH
rs34417064	A	G	-0.0105	0.0105	0.3138	Other diseases of urinary system || id:finn-b-N14_URINOTH	0.4498	finn-b-N14_URINOTH
rs35233670	T	C	-0.0037	0.0104	0.724299	Other diseases of urinary system || id:finn-b-N14_URINOTH	0.5245	finn-b-N14_URINOTH
rs9905659	G	A	0.0095	0.0135	0.4841	Other diseases of urinary system || id:finn-b-N14_URINOTH	0.1836	finn-b-N14_URINOTH
rs4506934	C	T	0.0065	0.0163	0.6909	Other diseases of urinary system || id:finn-b-N14_URINOTH	0.1182	finn-b-N14_URINOTH
rs281379	A	G	-0.0122	0.0106	0.2511	Other diseases of urinary system || id:finn-b-N14_URINOTH	0.4086	finn-b-N14_URINOTH
rs12974142	G	A	-0.0062	0.0204	0.759899	Other diseases of urinary system || id:finn-b-N14_URINOTH	0.07032	finn-b-N14_URINOTH
rs2206482	T	G	0.0111	0.0107	0.2986	Other diseases of urinary system || id:finn-b-N14_URINOTH	0.3954	finn-b-N14_URINOTH
rs4814689	C	T	-0.0226	0.0252	0.3685	Other diseases of urinary system || id:finn-b-N14_URINOTH	0.04494	finn-b-N14_URINOTH
rs2930903	C	G	0.0171	0.0109	0.1167	Other diseases of urinary system || id:finn-b-N14_URINOTH	0.3625	finn-b-N14_URINOTH
rs78735375	A	C	-0.0057	0.0268	0.8315	Other diseases of urinary system || id:finn-b-N14_URINOTH	0.04001	finn-b-N14_URINOTH
rs4985746	A	G	-0.0167	0.0173	0.335	Other diseases of urinary system || id:finn-b-N14_URINOTH	0.8971	finn-b-N14_URINOTH
rs630939	C	T	0.0051	0.0106	0.627001	Other diseases of urinary system || id:finn-b-N14_URINOTH	0.4514	finn-b-N14_URINOTH
rs34989881	A	G	0.0226	0.0249	0.3641	Other diseases of urinary system || id:finn-b-N14_URINOTH	0.04859	finn-b-N14_URINOTH
rs6087811	T	G	-0.0297	0.0174	0.0877102	Other diseases of urinary system || id:finn-b-N14_URINOTH	0.1015	finn-b-N14_URINOTH
rs12909713	C	T	-0.0137	0.0104	0.1866	Other diseases of urinary system || id:finn-b-N14_URINOTH	0.4887	finn-b-N14_URINOTH
rs7170984	T	C	0.0066	0.0116	0.5674	Other diseases of urinary system || id:finn-b-N14_URINOTH	0.2824	finn-b-N14_URINOTH
rs28537087	G	A	-0.0243	0.0121	0.0447796	Other diseases of urinary system || id:finn-b-N14_URINOTH	0.2489	finn-b-N14_URINOTH
rs62024432	C	T	-0.0068	0.0177	0.7014	Other diseases of urinary system || id:finn-b-N14_URINOTH	0.09631	finn-b-N14_URINOTH
rs12930556	C	T	0.0023	0.0105	0.8243	Other diseases of urinary system || id:finn-b-N14_URINOTH	0.4571	finn-b-N14_URINOTH
rs1862649	G	A	-0.0081	0.0206	0.6936	Other diseases of urinary system || id:finn-b-N14_URINOTH	0.06887	finn-b-N14_URINOTH
rs111966731	T	C	-0.0242	0.0185	0.1911	Other diseases of urinary system || id:finn-b-N14_URINOTH	0.0863	finn-b-N14_URINOTH
rs9932954	A	G	-0.0284	0.0111	0.01034	Other diseases of urinary system || id:finn-b-N14_URINOTH	0.3345	finn-b-N14_URINOTH
rs16962433	A	T	0.0161	0.0214	0.4528	Other diseases of urinary system || id:finn-b-N14_URINOTH	0.06309	finn-b-N14_URINOTH
rs72759041	G	T	0.0094	0.0129	0.469	Other diseases of urinary system || id:finn-b-N14_URINOTH	0.2088	finn-b-N14_URINOTH
rs4247078	G	C	0.0079	0.0107	0.461	Other diseases of urinary system || id:finn-b-N14_URINOTH	0.6106	finn-b-N14_URINOTH
rs78222136	G	C	0.0196	0.0184	0.288	Other diseases of urinary system || id:finn-b-N14_URINOTH	0.08799	finn-b-N14_URINOTH
rs929878	T	C	-0.0045	0.0127	0.7219	Other diseases of urinary system || id:finn-b-N14_URINOTH	0.7868	finn-b-N14_URINOTH
rs11150408	G	T	-0.0249	0.0105	0.0177101	Other diseases of urinary system || id:finn-b-N14_URINOTH	0.521	finn-b-N14_URINOTH
rs1958519	T	A	-0.0049	0.0105	0.6385	Other diseases of urinary system || id:finn-b-N14_URINOTH	0.4563	finn-b-N14_URINOTH
rs74474130	T	G	0.0381	0.0285	0.1809	Other diseases of urinary system || id:finn-b-N14_URINOTH	0.03573	finn-b-N14_URINOTH
rs10147907	T	G	0.0028	0.0198	0.8864	Other diseases of urinary system || id:finn-b-N14_URINOTH	0.07888	finn-b-N14_URINOTH
rs4904512	T	C	-0.0356	0.0155	0.0218002	Other diseases of urinary system || id:finn-b-N14_URINOTH	0.1291	finn-b-N14_URINOTH
rs11263806	A	G	0.0062	0.011	0.575	Other diseases of urinary system || id:finn-b-N14_URINOTH	0.3409	finn-b-N14_URINOTH
rs16955299	G	A	-0.0014	0.0176	0.9379	Other diseases of urinary system || id:finn-b-N14_URINOTH	0.09879	finn-b-N14_URINOTH
rs79582700	C	G	-0.0091	0.0159	0.566899	Other diseases of urinary system || id:finn-b-N14_URINOTH	0.1219	finn-b-N14_URINOTH
rs73952017	C	T	0.0105	0.0172	0.54	Other diseases of urinary system || id:finn-b-N14_URINOTH	0.1024	finn-b-N14_URINOTH
rs328312	T	A	0.0061	0.0105	0.5595	Other diseases of urinary system || id:finn-b-N14_URINOTH	0.4616	finn-b-N14_URINOTH
rs74034332	G	A	-0.0182	0.0217	0.401	Other diseases of urinary system || id:finn-b-N14_URINOTH	0.06166	finn-b-N14_URINOTH
rs12921100	T	A	0.0122	0.0117	0.2987	Other diseases of urinary system || id:finn-b-N14_URINOTH	0.7295	finn-b-N14_URINOTH
rs12986312	T	G	0.0067	0.0114	0.5586	Other diseases of urinary system || id:finn-b-N14_URINOTH	0.2994	finn-b-N14_URINOTH
rs918449	G	A	-0.0065	0.0202	0.7465	Other diseases of urinary system || id:finn-b-N14_URINOTH	0.9282	finn-b-N14_URINOTH
rs12611395	G	A	0.0132	0.0171	0.439	Other diseases of urinary system || id:finn-b-N14_URINOTH	0.8941	finn-b-N14_URINOTH
rs6508769	C	T	-0.0305	0.0147	0.0386803	Other diseases of urinary system || id:finn-b-N14_URINOTH	0.8534	finn-b-N14_URINOTH
rs75158211	T	C	-0.006	0.0147	0.6853	Other diseases of urinary system || id:finn-b-N14_URINOTH	0.1477	finn-b-N14_URINOTH
rs55658617	T	C	-0.0015	0.0287	0.9572	Other diseases of urinary system || id:finn-b-N14_URINOTH	0.03509	finn-b-N14_URINOTH
rs243585	C	G	-0.0076	0.0118	0.518601	Other diseases of urinary system || id:finn-b-N14_URINOTH	0.284	finn-b-N14_URINOTH
rs189356	G	A	-0.0091	0.0106	0.388	Other diseases of urinary system || id:finn-b-N14_URINOTH	0.5707	finn-b-N14_URINOTH
rs6092149	A	T	0.0133	0.0106	0.2094	Other diseases of urinary system || id:finn-b-N14_URINOTH	0.4219	finn-b-N14_URINOTH
rs10274562	C	T	-0.0132	0.0107	0.2173	Other diseases of urinary system || id:finn-b-N14_URINOTH	0.3802	finn-b-N14_URINOTH
rs4723021	T	C	0.0468	0.0208	0.02426	Other diseases of urinary system || id:finn-b-N14_URINOTH	0.06796	finn-b-N14_URINOTH
rs12701617	A	G	0.0001	0.0104	0.9903	Other diseases of urinary system || id:finn-b-N14_URINOTH	0.4648	finn-b-N14_URINOTH
rs2240838	G	A	0.0048	0.0105	0.647201	Other diseases of urinary system || id:finn-b-N14_URINOTH	0.4604	finn-b-N14_URINOTH
rs73341549	T	C	0.0137	0.0224	0.54	Other diseases of urinary system || id:finn-b-N14_URINOTH	0.05704	finn-b-N14_URINOTH
rs6953849	A	G	-0.0209	0.0136	0.1235	Other diseases of urinary system || id:finn-b-N14_URINOTH	0.1786	finn-b-N14_URINOTH
rs35166120	G	C	0.0155	0.0126	0.2178	Other diseases of urinary system || id:finn-b-N14_URINOTH	0.7763	finn-b-N14_URINOTH
rs9657374	C	T	0.0151	0.0114	0.1857	Other diseases of urinary system || id:finn-b-N14_URINOTH	0.2935	finn-b-N14_URINOTH
rs2644627	C	G	-0.0023	0.0106	0.8304	Other diseases of urinary system || id:finn-b-N14_URINOTH	0.4286	finn-b-N14_URINOTH
rs35703006	G	T	0.0077	0.0121	0.524499	Other diseases of urinary system || id:finn-b-N14_URINOTH	0.2444	finn-b-N14_URINOTH
rs57091572	A	G	0.0221	0.0154	0.151	Other diseases of urinary system || id:finn-b-N14_URINOTH	0.1318	finn-b-N14_URINOTH
rs17730011	G	A	-0.0115	0.0127	0.3682	Other diseases of urinary system || id:finn-b-N14_URINOTH	0.2153	finn-b-N14_URINOTH
rs740358	G	T	-0.0011	0.0214	0.958	Other diseases of urinary system || id:finn-b-N14_URINOTH	0.06343	finn-b-N14_URINOTH
rs12539819	C	T	0.0184	0.0211	0.3844	Other diseases of urinary system || id:finn-b-N14_URINOTH	0.06922	finn-b-N14_URINOTH
rs62481985	G	C	0.0083	0.0106	0.4326	Other diseases of urinary system || id:finn-b-N14_URINOTH	0.4245	finn-b-N14_URINOTH
rs2733072	G	A	0.0052	0.0105	0.6169	Other diseases of urinary system || id:finn-b-N14_URINOTH	0.5029	finn-b-N14_URINOTH
rs1416041	A	C	0.0062	0.0129	0.6278	Other diseases of urinary system || id:finn-b-N14_URINOTH	0.2085	finn-b-N14_URINOTH
rs1035691	G	A	0.0132	0.0107	0.2189	Other diseases of urinary system || id:finn-b-N14_URINOTH	0.5959	finn-b-N14_URINOTH
rs10831953	G	A	-0.0015	0.0114	0.8918	Other diseases of urinary system || id:finn-b-N14_URINOTH	0.2999	finn-b-N14_URINOTH
rs11026530	T	C	-0.0101	0.0147	0.4916	Other diseases of urinary system || id:finn-b-N14_URINOTH	0.1499	finn-b-N14_URINOTH
rs55910161	C	T	0.0181	0.0166	0.2755	Other diseases of urinary system || id:finn-b-N14_URINOTH	0.1123	finn-b-N14_URINOTH
rs265534	T	G	-0.0038	0.0105	0.714801	Other diseases of urinary system || id:finn-b-N14_URINOTH	0.4681	finn-b-N14_URINOTH
rs61875484	C	G	-0.029	0.0179	0.1056	Other diseases of urinary system || id:finn-b-N14_URINOTH	0.09517	finn-b-N14_URINOTH
rs72836424	C	T	0.0147	0.0167	0.3782	Other diseases of urinary system || id:finn-b-N14_URINOTH	0.1109	finn-b-N14_URINOTH
rs2998141	C	T	-0.0148	0.0124	0.2308	Other diseases of urinary system || id:finn-b-N14_URINOTH	0.7652	finn-b-N14_URINOTH
rs16918425	A	T	0.0588	0.0245	0.0163001	Other diseases of urinary system || id:finn-b-N14_URINOTH	0.04783	finn-b-N14_URINOTH
rs76022354	C	T	0.0022	0.024	0.9269	Other diseases of urinary system || id:finn-b-N14_URINOTH	0.04979	finn-b-N14_URINOTH
rs7911787	G	T	-0.0257	0.0297	0.3857	Other diseases of urinary system || id:finn-b-N14_URINOTH	0.03203	finn-b-N14_URINOTH
rs3127230	C	T	-0.0101	0.0114	0.3745	Other diseases of urinary system || id:finn-b-N14_URINOTH	0.3042	finn-b-N14_URINOTH
rs117092367	A	T	-0.0319	0.0212	0.1317	Other diseases of urinary system || id:finn-b-N14_URINOTH	0.06554	finn-b-N14_URINOTH
rs10832801	A	C	-0.0043	0.0117	0.7098	Other diseases of urinary system || id:finn-b-N14_URINOTH	0.284	finn-b-N14_URINOTH
rs2939766	A	G	0.0125	0.0105	0.2327	Other diseases of urinary system || id:finn-b-N14_URINOTH	0.4497	finn-b-N14_URINOTH
rs7935794	C	G	0.0128	0.0228	0.5737	Other diseases of urinary system || id:finn-b-N14_URINOTH	0.0559	finn-b-N14_URINOTH
rs4753063	A	G	0.0002	0.0105	0.986	Other diseases of urinary system || id:finn-b-N14_URINOTH	0.5535	finn-b-N14_URINOTH
rs561239	A	G	-0.0007	0.0129	0.9593	Other diseases of urinary system || id:finn-b-N14_URINOTH	0.2101	finn-b-N14_URINOTH
rs34071565	T	A	-0.0096	0.0215	0.6557	Other diseases of urinary system || id:finn-b-N14_URINOTH	0.06316	finn-b-N14_URINOTH
rs78056098	G	T	-0.0099	0.0109	0.3652	Other diseases of urinary system || id:finn-b-N14_URINOTH	0.3552	finn-b-N14_URINOTH
rs478972	C	T	0.0095	0.0181	0.597301	Other diseases of urinary system || id:finn-b-N14_URINOTH	0.9084	finn-b-N14_URINOTH
rs35182105	A	G	-0.009	0.0232	0.6968	Other diseases of urinary system || id:finn-b-N14_URINOTH	0.05394	finn-b-N14_URINOTH
rs2213117	T	G	0.0032	0.0143	0.8231	Other diseases of urinary system || id:finn-b-N14_URINOTH	0.1622	finn-b-N14_URINOTH
rs1939881	G	A	0.0176	0.0223	0.4286	Other diseases of urinary system || id:finn-b-N14_URINOTH	0.05881	finn-b-N14_URINOTH
rs11604400	C	T	-0.0061	0.017	0.717799	Other diseases of urinary system || id:finn-b-N14_URINOTH	0.1049	finn-b-N14_URINOTH
rs10892089	C	G	0.021	0.0134	0.1179	Other diseases of urinary system || id:finn-b-N14_URINOTH	0.1843	finn-b-N14_URINOTH
rs7113155	C	G	0.0134	0.0109	0.2176	Other diseases of urinary system || id:finn-b-N14_URINOTH	0.6359	finn-b-N14_URINOTH
rs1784446	A	G	-0.006	0.0104	0.562999	Other diseases of urinary system || id:finn-b-N14_URINOTH	0.5118	finn-b-N14_URINOTH
rs61883564	A	G	0.004	0.0152	0.7922	Other diseases of urinary system || id:finn-b-N14_URINOTH	0.1362	finn-b-N14_URINOTH
rs2187447	A	C	-0.0036	0.0219	0.8676	Other diseases of urinary system || id:finn-b-N14_URINOTH	0.06057	finn-b-N14_URINOTH
rs6591893	A	G	-0.0041	0.011	0.7079	Other diseases of urinary system || id:finn-b-N14_URINOTH	0.6523	finn-b-N14_URINOTH
rs2013594	C	T	-0.0035	0.0107	0.7461	Other diseases of urinary system || id:finn-b-N14_URINOTH	0.5979	finn-b-N14_URINOTH
rs10769159	C	G	-0.0111	0.0107	0.2963	Other diseases of urinary system || id:finn-b-N14_URINOTH	0.3982	finn-b-N14_URINOTH
rs7109293	A	G	-0.0107	0.0164	0.5157	Other diseases of urinary system || id:finn-b-N14_URINOTH	0.1172	finn-b-N14_URINOTH
rs10885477	T	C	0.0243	0.024	0.311	Other diseases of urinary system || id:finn-b-N14_URINOTH	0.04994	finn-b-N14_URINOTH
rs12812672	T	C	-0.0068	0.0202	0.734	Other diseases of urinary system || id:finn-b-N14_URINOTH	0.07177	finn-b-N14_URINOTH
rs515984	C	T	0.0261	0.0165	0.1129	Other diseases of urinary system || id:finn-b-N14_URINOTH	0.8859	finn-b-N14_URINOTH
rs7923280	T	A	-0.0133	0.0117	0.2542	Other diseases of urinary system || id:finn-b-N14_URINOTH	0.7186	finn-b-N14_URINOTH
rs11139361	C	T	-0.0051	0.0111	0.6436	Other diseases of urinary system || id:finn-b-N14_URINOTH	0.6779	finn-b-N14_URINOTH
rs7860510	G	C	0.0126	0.0195	0.5196	Other diseases of urinary system || id:finn-b-N14_URINOTH	0.07684	finn-b-N14_URINOTH
rs9423647	G	A	0.01	0.0105	0.3391	Other diseases of urinary system || id:finn-b-N14_URINOTH	0.558	finn-b-N14_URINOTH
rs17148768	G	A	0.0097	0.014	0.4873	Other diseases of urinary system || id:finn-b-N14_URINOTH	0.1677	finn-b-N14_URINOTH
rs3995795	C	T	0.022	0.0107	0.0403005	Other diseases of urinary system || id:finn-b-N14_URINOTH	0.4019	finn-b-N14_URINOTH
rs2104588	C	T	0.0519	0.0226	0.0218701	Other diseases of urinary system || id:finn-b-N14_URINOTH	0.9436	finn-b-N14_URINOTH
rs16934069	T	C	-0.0008	0.0138	0.9547	Other diseases of urinary system || id:finn-b-N14_URINOTH	0.1782	finn-b-N14_URINOTH
rs1331592	G	C	-0.0226	0.0123	0.0650294	Other diseases of urinary system || id:finn-b-N14_URINOTH	0.7626	finn-b-N14_URINOTH
rs61249479	A	C	-0.0185	0.0144	0.1985	Other diseases of urinary system || id:finn-b-N14_URINOTH	0.1551	finn-b-N14_URINOTH
rs142855850	A	G	-0.0196	0.0177	0.2687	Other diseases of urinary system || id:finn-b-N14_URINOTH	0.09816	finn-b-N14_URINOTH
rs75764681	T	C	-0.0263	0.0256	0.3036	Other diseases of urinary system || id:finn-b-N14_URINOTH	0.04504	finn-b-N14_URINOTH
rs11258178	A	G	-0.0056	0.0105	0.5915	Other diseases of urinary system || id:finn-b-N14_URINOTH	0.4906	finn-b-N14_URINOTH
rs1999224	G	T	0.0163	0.0176	0.3523	Other diseases of urinary system || id:finn-b-N14_URINOTH	0.09749	finn-b-N14_URINOTH
rs11243416	T	C	0.0031	0.0206	0.8817	Other diseases of urinary system || id:finn-b-N14_URINOTH	0.06966	finn-b-N14_URINOTH
rs3124783	G	A	-0.0108	0.0155	0.4851	Other diseases of urinary system || id:finn-b-N14_URINOTH	0.8708	finn-b-N14_URINOTH
rs592299	T	C	0.0104	0.0105	0.3204	Other diseases of urinary system || id:finn-b-N14_URINOTH	0.5448	finn-b-N14_URINOTH
rs10858364	G	T	-0.0216	0.0124	0.0819408	Other diseases of urinary system || id:finn-b-N14_URINOTH	0.2512	finn-b-N14_URINOTH
rs11251024	G	A	-0.016	0.0118	0.1767	Other diseases of urinary system || id:finn-b-N14_URINOTH	0.2644	finn-b-N14_URINOTH
rs1145877	G	A	0.0136	0.0151	0.3673	Other diseases of urinary system || id:finn-b-N14_URINOTH	0.8622	finn-b-N14_URINOTH
rs10262702	T	C	-0.0118	0.0159	0.457	Other diseases of urinary system || id:finn-b-N14_URINOTH	0.1241	finn-b-N14_URINOTH
rs73158814	C	G	0.0273	0.0281	0.332	Other diseases of urinary system || id:finn-b-N14_URINOTH	0.03672	finn-b-N14_URINOTH
rs322296	G	A	-0.0202	0.0199	0.31	Other diseases of urinary system || id:finn-b-N14_URINOTH	0.07456	finn-b-N14_URINOTH
rs10231386	G	C	0.0093	0.0193	0.6303	Other diseases of urinary system || id:finn-b-N14_URINOTH	0.07884	finn-b-N14_URINOTH
rs11766971	C	T	-0.0102	0.0105	0.3303	Other diseases of urinary system || id:finn-b-N14_URINOTH	0.4483	finn-b-N14_URINOTH
rs71564433	T	A	-0.0001	0.0132	0.9953	Other diseases of urinary system || id:finn-b-N14_URINOTH	0.2013	finn-b-N14_URINOTH
rs10782329	C	T	0.0062	0.0113	0.5858	Other diseases of urinary system || id:finn-b-N14_URINOTH	0.3106	finn-b-N14_URINOTH
rs11547158	A	G	0.0142	0.0153	0.3551	Other diseases of urinary system || id:finn-b-N14_URINOTH	0.1345	finn-b-N14_URINOTH
rs36155147	T	C	0.0167	0.0114	0.1447	Other diseases of urinary system || id:finn-b-N14_URINOTH	0.6601	finn-b-N14_URINOTH
rs62435498	C	A	-0.0085	0.0173	0.621199	Other diseases of urinary system || id:finn-b-N14_URINOTH	0.1026	finn-b-N14_URINOTH
rs10952110	G	T	0.0019	0.0105	0.8551	Other diseases of urinary system || id:finn-b-N14_URINOTH	0.4445	finn-b-N14_URINOTH
rs4492265	G	A	0.0053	0.0114	0.6446	Other diseases of urinary system || id:finn-b-N14_URINOTH	0.6955	finn-b-N14_URINOTH
rs56310940	G	C	-0.0029	0.0159	0.8576	Other diseases of urinary system || id:finn-b-N14_URINOTH	0.1222	finn-b-N14_URINOTH
rs342302	A	G	-0.0158	0.0152	0.299	Other diseases of urinary system || id:finn-b-N14_URINOTH	0.1379	finn-b-N14_URINOTH
rs11770843	C	T	-0.0021	0.0112	0.8491	Other diseases of urinary system || id:finn-b-N14_URINOTH	0.3284	finn-b-N14_URINOTH
rs76029318	T	C	0.014	0.0215	0.5164	Other diseases of urinary system || id:finn-b-N14_URINOTH	0.06285	finn-b-N14_URINOTH
rs17586763	T	C	-0.0201	0.0236	0.3958	Other diseases of urinary system || id:finn-b-N14_URINOTH	0.05119	finn-b-N14_URINOTH
rs173120	C	T	-0.013	0.0133	0.3303	Other diseases of urinary system || id:finn-b-N14_URINOTH	0.8095	finn-b-N14_URINOTH
rs4885016	C	T	0.0094	0.0153	0.5396	Other diseases of urinary system || id:finn-b-N14_URINOTH	0.8652	finn-b-N14_URINOTH
rs142372196	A	G	0.0135	0.0176	0.4445	Other diseases of urinary system || id:finn-b-N14_URINOTH	0.09873	finn-b-N14_URINOTH
rs57079348	T	G	0.0138	0.0225	0.5394	Other diseases of urinary system || id:finn-b-N14_URINOTH	0.05712	finn-b-N14_URINOTH
rs9529719	C	T	-0.0107	0.0112	0.3374	Other diseases of urinary system || id:finn-b-N14_URINOTH	0.6763	finn-b-N14_URINOTH
rs9522712	T	C	0.0269	0.0147	0.0664906	Other diseases of urinary system || id:finn-b-N14_URINOTH	0.1492	finn-b-N14_URINOTH
rs79757635	C	A	-0.0124	0.0155	0.4219	Other diseases of urinary system || id:finn-b-N14_URINOTH	0.1368	finn-b-N14_URINOTH
rs7322849	T	C	0.0075	0.0183	0.6797	Other diseases of urinary system || id:finn-b-N14_URINOTH	0.09215	finn-b-N14_URINOTH
rs4981345	T	C	-0.0117	0.0111	0.2923	Other diseases of urinary system || id:finn-b-N14_URINOTH	0.3296	finn-b-N14_URINOTH
rs816292	T	C	0.0086	0.0114	0.4524	Other diseases of urinary system || id:finn-b-N14_URINOTH	0.2958	finn-b-N14_URINOTH
rs34297067	A	G	-0.0029	0.0147	0.8447	Other diseases of urinary system || id:finn-b-N14_URINOTH	0.1473	finn-b-N14_URINOTH
rs56970041	T	G	-0.0016	0.0218	0.9414	Other diseases of urinary system || id:finn-b-N14_URINOTH	0.06123	finn-b-N14_URINOTH
rs114889439	A	G	-0.0114	0.029	0.6943	Other diseases of urinary system || id:finn-b-N14_URINOTH	0.03451	finn-b-N14_URINOTH
rs10108398	G	A	-0.0146	0.0117	0.2096	Other diseases of urinary system || id:finn-b-N14_URINOTH	0.2755	finn-b-N14_URINOTH
rs3900776	G	A	0.0231	0.0315	0.4648	Other diseases of urinary system || id:finn-b-N14_URINOTH	0.02828	finn-b-N14_URINOTH
rs1962916	G	A	-0.0041	0.0108	0.7035	Other diseases of urinary system || id:finn-b-N14_URINOTH	0.5991	finn-b-N14_URINOTH
rs10090365	G	A	-0.0052	0.0104	0.617401	Other diseases of urinary system || id:finn-b-N14_URINOTH	0.5217	finn-b-N14_URINOTH
rs72676854	T	C	-0.0062	0.0235	0.793601	Other diseases of urinary system || id:finn-b-N14_URINOTH	0.05312	finn-b-N14_URINOTH
rs35055552	T	C	-0.0248	0.0152	0.1021	Other diseases of urinary system || id:finn-b-N14_URINOTH	0.1408	finn-b-N14_URINOTH
rs113593397	A	G	0.0048	0.0178	0.786401	Other diseases of urinary system || id:finn-b-N14_URINOTH	0.0959	finn-b-N14_URINOTH
rs10815577	C	G	0.0075	0.0106	0.4771	Other diseases of urinary system || id:finn-b-N14_URINOTH	0.4196	finn-b-N14_URINOTH
rs736744	T	C	-0.0012	0.0105	0.9094	Other diseases of urinary system || id:finn-b-N14_URINOTH	0.568	finn-b-N14_URINOTH
rs140912403	C	T	0.0025	0.0224	0.9118	Other diseases of urinary system || id:finn-b-N14_URINOTH	0.05805	finn-b-N14_URINOTH
rs13247359	G	A	-0.0029	0.0105	0.7822	Other diseases of urinary system || id:finn-b-N14_URINOTH	0.4458	finn-b-N14_URINOTH
rs4764863	G	A	0.0049	0.0105	0.642899	Other diseases of urinary system || id:finn-b-N14_URINOTH	0.5515	finn-b-N14_URINOTH
rs12825290	C	G	0.0028	0.0219	0.8996	Other diseases of urinary system || id:finn-b-N14_URINOTH	0.06148	finn-b-N14_URINOTH
rs2160994	C	T	0.0171	0.011	0.1215	Other diseases of urinary system || id:finn-b-N14_URINOTH	0.665	finn-b-N14_URINOTH
rs12320842	C	G	-0.0053	0.0154	0.729201	Other diseases of urinary system || id:finn-b-N14_URINOTH	0.1343	finn-b-N14_URINOTH
rs4340090	C	T	-0.0005	0.0162	0.977	Other diseases of urinary system || id:finn-b-N14_URINOTH	0.1179	finn-b-N14_URINOTH
rs4537857	T	C	0.0055	0.0111	0.6195	Other diseases of urinary system || id:finn-b-N14_URINOTH	0.333	finn-b-N14_URINOTH
rs10506058	A	G	-0.0032	0.0106	0.760599	Other diseases of urinary system || id:finn-b-N14_URINOTH	0.4224	finn-b-N14_URINOTH
rs150096134	T	A	-0.0173	0.0175	0.3227	Other diseases of urinary system || id:finn-b-N14_URINOTH	0.1002	finn-b-N14_URINOTH
rs34576931	G	C	-0.0082	0.0206	0.6917	Other diseases of urinary system || id:finn-b-N14_URINOTH	0.0687	finn-b-N14_URINOTH
rs4244069	A	G	0.0069	0.0158	0.662799	Other diseases of urinary system || id:finn-b-N14_URINOTH	0.873	finn-b-N14_URINOTH
rs76532867	T	C	-0.0404	0.0268	0.1319	Other diseases of urinary system || id:finn-b-N14_URINOTH	0.03971	finn-b-N14_URINOTH
rs55793120	T	C	0.0044	0.022	0.8416	Other diseases of urinary system || id:finn-b-N14_URINOTH	0.06162	finn-b-N14_URINOTH
rs34302036	G	A	0.0197	0.0106	0.0617405	Other diseases of urinary system || id:finn-b-N14_URINOTH	0.5767	finn-b-N14_URINOTH
rs28696126	T	A	0.0105	0.0156	0.4998	Other diseases of urinary system || id:finn-b-N14_URINOTH	0.8718	finn-b-N14_URINOTH
rs12537781	T	C	-0.0205	0.0122	0.0939096	Other diseases of urinary system || id:finn-b-N14_URINOTH	0.2379	finn-b-N14_URINOTH
rs961091	G	A	-0.0047	0.0108	0.662799	Other diseases of urinary system || id:finn-b-N14_URINOTH	0.3714	finn-b-N14_URINOTH
rs12415649	G	C	0.003	0.0126	0.8138	Other diseases of urinary system || id:finn-b-N14_URINOTH	0.219	finn-b-N14_URINOTH
rs11195523	C	A	-0.0099	0.0121	0.4127	Other diseases of urinary system || id:finn-b-N14_URINOTH	0.7495	finn-b-N14_URINOTH
rs11725156	T	G	0.0087	0.0107	0.4181	Other diseases of urinary system || id:finn-b-N14_URINOTH	0.6089	finn-b-N14_URINOTH
rs11730038	G	A	0.0134	0.0115	0.2455	Other diseases of urinary system || id:finn-b-N14_URINOTH	0.2935	finn-b-N14_URINOTH
rs12512543	A	C	0.0071	0.0188	0.705	Other diseases of urinary system || id:finn-b-N14_URINOTH	0.08542	finn-b-N14_URINOTH
rs67746927	C	G	0.0064	0.0106	0.548399	Other diseases of urinary system || id:finn-b-N14_URINOTH	0.5289	finn-b-N14_URINOTH
rs73802842	C	A	-0.011	0.0123	0.3695	Other diseases of urinary system || id:finn-b-N14_URINOTH	0.2388	finn-b-N14_URINOTH
rs882348	A	G	-0.0104	0.0162	0.5215	Other diseases of urinary system || id:finn-b-N14_URINOTH	0.1169	finn-b-N14_URINOTH
rs1520207	T	C	0.0081	0.0104	0.4374	Other diseases of urinary system || id:finn-b-N14_URINOTH	0.5009	finn-b-N14_URINOTH
rs2862811	C	T	-0.0101	0.0114	0.3746	Other diseases of urinary system || id:finn-b-N14_URINOTH	0.699	finn-b-N14_URINOTH
rs35177866	A	G	0.0455	0.0201	0.02391	Other diseases of urinary system || id:finn-b-N14_URINOTH	0.07667	finn-b-N14_URINOTH
rs1426266	C	T	0.0003	0.0117	0.9767	Other diseases of urinary system || id:finn-b-N14_URINOTH	0.7275	finn-b-N14_URINOTH
rs1899291	T	C	-0.0159	0.0143	0.2664	Other diseases of urinary system || id:finn-b-N14_URINOTH	0.842	finn-b-N14_URINOTH
rs13147561	A	G	-0.0132	0.0181	0.4657	Other diseases of urinary system || id:finn-b-N14_URINOTH	0.09333	finn-b-N14_URINOTH
rs114731706	T	G	-0.0023	0.0298	0.9376	Other diseases of urinary system || id:finn-b-N14_URINOTH	0.03201	finn-b-N14_URINOTH
rs35225860	A	G	-0.0201	0.0268	0.454	Other diseases of urinary system || id:finn-b-N14_URINOTH	0.03918	finn-b-N14_URINOTH
rs7583465	C	T	-0.0061	0.0105	0.5611	Other diseases of urinary system || id:finn-b-N14_URINOTH	0.4396	finn-b-N14_URINOTH
rs6721459	G	A	-0.0046	0.0106	0.6645	Other diseases of urinary system || id:finn-b-N14_URINOTH	0.4065	finn-b-N14_URINOTH
rs12621813	G	A	-0.0064	0.0118	0.5854	Other diseases of urinary system || id:finn-b-N14_URINOTH	0.2665	finn-b-N14_URINOTH
rs74919520	G	A	0.0049	0.0168	0.769699	Other diseases of urinary system || id:finn-b-N14_URINOTH	0.1074	finn-b-N14_URINOTH
rs72815774	T	C	0.0013	0.0233	0.9546	Other diseases of urinary system || id:finn-b-N14_URINOTH	0.05995	finn-b-N14_URINOTH
rs149744580	A	G	0.0136	0.0233	0.5595	Other diseases of urinary system || id:finn-b-N14_URINOTH	0.05332	finn-b-N14_URINOTH
rs2418654	C	T	-0.0013	0.0107	0.9025	Other diseases of urinary system || id:finn-b-N14_URINOTH	0.4316	finn-b-N14_URINOTH
rs2192926	A	G	0.0064	0.0111	0.5612	Other diseases of urinary system || id:finn-b-N14_URINOTH	0.3284	finn-b-N14_URINOTH
rs17012738	T	G	-0.0036	0.0104	0.7304	Other diseases of urinary system || id:finn-b-N14_URINOTH	0.4904	finn-b-N14_URINOTH
rs6743026	T	C	0.0103	0.0132	0.4357	Other diseases of urinary system || id:finn-b-N14_URINOTH	0.1931	finn-b-N14_URINOTH
rs71428626	G	T	-0.0025	0.0293	0.9329	Other diseases of urinary system || id:finn-b-N14_URINOTH	0.03223	finn-b-N14_URINOTH
rs4849717	T	A	0.0206	0.0199	0.3021	Other diseases of urinary system || id:finn-b-N14_URINOTH	0.07429	finn-b-N14_URINOTH
rs56791201	C	T	-0.0051	0.0109	0.638	Other diseases of urinary system || id:finn-b-N14_URINOTH	0.6387	finn-b-N14_URINOTH
rs72793667	A	G	0.0104	0.0267	0.6953	Other diseases of urinary system || id:finn-b-N14_URINOTH	0.04035	finn-b-N14_URINOTH
rs6742198	A	G	-0.0114	0.0123	0.3543	Other diseases of urinary system || id:finn-b-N14_URINOTH	0.7582	finn-b-N14_URINOTH
rs62157625	T	C	-0.0135	0.016	0.4015	Other diseases of urinary system || id:finn-b-N14_URINOTH	0.1249	finn-b-N14_URINOTH
rs11691923	G	A	-0.006	0.0104	0.566301	Other diseases of urinary system || id:finn-b-N14_URINOTH	0.4795	finn-b-N14_URINOTH
rs6706173	A	C	-0.0371	0.0151	0.01417	Other diseases of urinary system || id:finn-b-N14_URINOTH	0.1371	finn-b-N14_URINOTH
rs10084203	G	A	0.0119	0.0155	0.4446	Other diseases of urinary system || id:finn-b-N14_URINOTH	0.8697	finn-b-N14_URINOTH
rs114279581	A	G	-0.0197	0.0197	0.3174	Other diseases of urinary system || id:finn-b-N14_URINOTH	0.07521	finn-b-N14_URINOTH
rs2240542	C	T	-0.0046	0.0118	0.696599	Other diseases of urinary system || id:finn-b-N14_URINOTH	0.265	finn-b-N14_URINOTH
rs10200320	T	C	-0.0023	0.0129	0.8574	Other diseases of urinary system || id:finn-b-N14_URINOTH	0.785	finn-b-N14_URINOTH
rs12693845	C	T	0.0158	0.0108	0.1439	Other diseases of urinary system || id:finn-b-N14_URINOTH	0.4107	finn-b-N14_URINOTH
rs1667315	G	A	-0.0019	0.0107	0.8557	Other diseases of urinary system || id:finn-b-N14_URINOTH	0.3916	finn-b-N14_URINOTH
rs62190261	A	C	0.0049	0.0186	0.793	Other diseases of urinary system || id:finn-b-N14_URINOTH	0.08756	finn-b-N14_URINOTH
rs57024273	T	C	0.0052	0.012	0.6618	Other diseases of urinary system || id:finn-b-N14_URINOTH	0.2574	finn-b-N14_URINOTH
rs10167839	A	G	0.0019	0.0109	0.8608	Other diseases of urinary system || id:finn-b-N14_URINOTH	0.3608	finn-b-N14_URINOTH
rs76784716	A	G	0.0309	0.0164	0.0603504	Other diseases of urinary system || id:finn-b-N14_URINOTH	0.114	finn-b-N14_URINOTH
rs4347804	G	A	0.0142	0.0296	0.6316	Other diseases of urinary system || id:finn-b-N14_URINOTH	0.9682	finn-b-N14_URINOTH
rs10209007	G	C	-0.0195	0.0233	0.4031	Other diseases of urinary system || id:finn-b-N14_URINOTH	0.05265	finn-b-N14_URINOTH
rs7586445	G	A	-0.0127	0.0156	0.4162	Other diseases of urinary system || id:finn-b-N14_URINOTH	0.1291	finn-b-N14_URINOTH
rs12467854	G	C	-0.0097	0.0128	0.452	Other diseases of urinary system || id:finn-b-N14_URINOTH	0.2112	finn-b-N14_URINOTH
rs4257531	G	A	0.0011	0.0172	0.9476	Other diseases of urinary system || id:finn-b-N14_URINOTH	0.1055	finn-b-N14_URINOTH
rs13383270	C	G	-0.0003	0.0105	0.9799	Other diseases of urinary system || id:finn-b-N14_URINOTH	0.5538	finn-b-N14_URINOTH
rs1595463	C	A	-0.0004	0.0105	0.9669	Other diseases of urinary system || id:finn-b-N14_URINOTH	0.5393	finn-b-N14_URINOTH
rs17032291	T	C	0.0003	0.0159	0.9874	Other diseases of urinary system || id:finn-b-N14_URINOTH	0.1264	finn-b-N14_URINOTH
rs6814436	C	T	0.0089	0.015	0.5514	Other diseases of urinary system || id:finn-b-N14_URINOTH	0.8592	finn-b-N14_URINOTH
rs7680684	T	C	-0.0007	0.011	0.9467	Other diseases of urinary system || id:finn-b-N14_URINOTH	0.6578	finn-b-N14_URINOTH
rs2702387	G	A	0.0171	0.0106	0.1074	Other diseases of urinary system || id:finn-b-N14_URINOTH	0.5955	finn-b-N14_URINOTH
rs326049	C	G	-0.0049	0.0119	0.677699	Other diseases of urinary system || id:finn-b-N14_URINOTH	0.267	finn-b-N14_URINOTH
rs11729256	T	C	0.0137	0.0139	0.3233	Other diseases of urinary system || id:finn-b-N14_URINOTH	0.1697	finn-b-N14_URINOTH
rs76430504	T	C	0.021	0.0244	0.3897	Other diseases of urinary system || id:finn-b-N14_URINOTH	0.04839	finn-b-N14_URINOTH
rs7712231	A	G	0.0165	0.0154	0.2843	Other diseases of urinary system || id:finn-b-N14_URINOTH	0.1329	finn-b-N14_URINOTH
rs340991	A	G	-0.0106	0.0118	0.3693	Other diseases of urinary system || id:finn-b-N14_URINOTH	0.2659	finn-b-N14_URINOTH
rs10044993	A	C	0.0231	0.0187	0.2171	Other diseases of urinary system || id:finn-b-N14_URINOTH	0.9146	finn-b-N14_URINOTH
rs6854026	C	T	0.0223	0.0105	0.0337202	Other diseases of urinary system || id:finn-b-N14_URINOTH	0.4384	finn-b-N14_URINOTH
rs2726805	A	G	-0.0022	0.0106	0.8379	Other diseases of urinary system || id:finn-b-N14_URINOTH	0.4706	finn-b-N14_URINOTH
rs56157888	A	C	-0.0006	0.0126	0.9648	Other diseases of urinary system || id:finn-b-N14_URINOTH	0.222	finn-b-N14_URINOTH
rs17074066	T	C	-0.0091	0.0372	0.8064	Other diseases of urinary system || id:finn-b-N14_URINOTH	0.02048	finn-b-N14_URINOTH
rs115777838	T	C	-0.0112	0.0166	0.497299	Other diseases of urinary system || id:finn-b-N14_URINOTH	0.1132	finn-b-N14_URINOTH
rs7638039	T	C	-0.0026	0.0121	0.8306	Other diseases of urinary system || id:finn-b-N14_URINOTH	0.247	finn-b-N14_URINOTH
rs6828768	C	T	0.0026	0.0104	0.8013	Other diseases of urinary system || id:finn-b-N14_URINOTH	0.4683	finn-b-N14_URINOTH
rs77455852	T	G	-0.0094	0.015	0.5306	Other diseases of urinary system || id:finn-b-N14_URINOTH	0.1509	finn-b-N14_URINOTH
rs240104	T	C	-0.0085	0.0117	0.4683	Other diseases of urinary system || id:finn-b-N14_URINOTH	0.2847	finn-b-N14_URINOTH
rs1032598	G	A	-0.0105	0.014	0.4508	Other diseases of urinary system || id:finn-b-N14_URINOTH	0.1663	finn-b-N14_URINOTH
rs61779207	G	A	0.0193	0.0126	0.1237	Other diseases of urinary system || id:finn-b-N14_URINOTH	0.2236	finn-b-N14_URINOTH
rs12741784	C	T	0.0023	0.012	0.8449	Other diseases of urinary system || id:finn-b-N14_URINOTH	0.2576	finn-b-N14_URINOTH
rs6664405	T	C	0.0239	0.015	0.1095	Other diseases of urinary system || id:finn-b-N14_URINOTH	0.1455	finn-b-N14_URINOTH
rs7538034	T	G	-0.003	0.0142	0.8339	Other diseases of urinary system || id:finn-b-N14_URINOTH	0.1636	finn-b-N14_URINOTH
rs12566247	T	A	0.0031	0.0106	0.7659	Other diseases of urinary system || id:finn-b-N14_URINOTH	0.4264	finn-b-N14_URINOTH
rs12078956	C	G	0.0026	0.0168	0.8759	Other diseases of urinary system || id:finn-b-N14_URINOTH	0.1096	finn-b-N14_URINOTH
rs638542	A	G	0.0161	0.0115	0.1614	Other diseases of urinary system || id:finn-b-N14_URINOTH	0.7124	finn-b-N14_URINOTH
rs3768491	G	A	0.0173	0.0115	0.1335	Other diseases of urinary system || id:finn-b-N14_URINOTH	0.7117	finn-b-N14_URINOTH
rs6681678	T	C	-0.0388	0.0291	0.1823	Other diseases of urinary system || id:finn-b-N14_URINOTH	0.9664	finn-b-N14_URINOTH
rs1340391	T	C	-0.0141	0.0153	0.3549	Other diseases of urinary system || id:finn-b-N14_URINOTH	0.135	finn-b-N14_URINOTH
rs11581881	C	T	-0.0067	0.0125	0.5895	Other diseases of urinary system || id:finn-b-N14_URINOTH	0.2366	finn-b-N14_URINOTH
rs1187983	C	T	-0.024	0.0172	0.1637	Other diseases of urinary system || id:finn-b-N14_URINOTH	0.1034	finn-b-N14_URINOTH
rs12566890	T	G	0.0086	0.0156	0.5797	Other diseases of urinary system || id:finn-b-N14_URINOTH	0.1318	finn-b-N14_URINOTH
rs7412979	C	G	0.0145	0.0191	0.4492	Other diseases of urinary system || id:finn-b-N14_URINOTH	0.08069	finn-b-N14_URINOTH
rs17785622	A	G	0.0138	0.0275	0.617101	Other diseases of urinary system || id:finn-b-N14_URINOTH	0.03799	finn-b-N14_URINOTH
rs6923695	T	G	0.0075	0.0209	0.721099	Other diseases of urinary system || id:finn-b-N14_URINOTH	0.06655	finn-b-N14_URINOTH
rs62414802	C	T	-0.0011	0.012	0.9272	Other diseases of urinary system || id:finn-b-N14_URINOTH	0.2493	finn-b-N14_URINOTH
rs62397761	A	G	-0.0013	0.0112	0.9091	Other diseases of urinary system || id:finn-b-N14_URINOTH	0.3202	finn-b-N14_URINOTH
rs6899771	A	G	-0.0014	0.0173	0.934	Other diseases of urinary system || id:finn-b-N14_URINOTH	0.1006	finn-b-N14_URINOTH
rs9494710	C	T	0.0139	0.0112	0.2149	Other diseases of urinary system || id:finn-b-N14_URINOTH	0.3222	finn-b-N14_URINOTH
rs2050185	A	G	0.0025	0.0108	0.8152	Other diseases of urinary system || id:finn-b-N14_URINOTH	0.6249	finn-b-N14_URINOTH
rs553072	G	A	-0.0181	0.0135	0.1815	Other diseases of urinary system || id:finn-b-N14_URINOTH	0.1881	finn-b-N14_URINOTH
rs77293403	A	G	-0.0325	0.0283	0.25	Other diseases of urinary system || id:finn-b-N14_URINOTH	0.03525	finn-b-N14_URINOTH
rs7706512	A	G	-0.0002	0.0104	0.984	Other diseases of urinary system || id:finn-b-N14_URINOTH	0.4787	finn-b-N14_URINOTH
rs7763512	A	G	0.0122	0.0106	0.2472	Other diseases of urinary system || id:finn-b-N14_URINOTH	0.5758	finn-b-N14_URINOTH
rs55736413	C	T	-0.014	0.0249	0.5734	Other diseases of urinary system || id:finn-b-N14_URINOTH	0.04657	finn-b-N14_URINOTH
rs9403580	C	T	-0.0045	0.0156	0.771401	Other diseases of urinary system || id:finn-b-N14_URINOTH	0.1288	finn-b-N14_URINOTH
rs10872669	G	A	0.0034	0.0183	0.8517	Other diseases of urinary system || id:finn-b-N14_URINOTH	0.9084	finn-b-N14_URINOTH
rs112159068	A	T	0.0148	0.0315	0.639699	Other diseases of urinary system || id:finn-b-N14_URINOTH	0.03002	finn-b-N14_URINOTH
rs77658038	A	C	0.0251	0.013	0.0531398	Other diseases of urinary system || id:finn-b-N14_URINOTH	0.2044	finn-b-N14_URINOTH
rs6769553	A	G	0.007	0.0119	0.5572	Other diseases of urinary system || id:finn-b-N14_URINOTH	0.2615	finn-b-N14_URINOTH
rs9818949	T	G	0.001	0.0132	0.9425	Other diseases of urinary system || id:finn-b-N14_URINOTH	0.7969	finn-b-N14_URINOTH
rs55888705	A	G	0.0034	0.0116	0.7703	Other diseases of urinary system || id:finn-b-N14_URINOTH	0.2817	finn-b-N14_URINOTH
rs994813	A	C	0.0012	0.0105	0.9119	Other diseases of urinary system || id:finn-b-N14_URINOTH	0.4784	finn-b-N14_URINOTH
rs12508214	C	T	-0.0096	0.0112	0.3912	Other diseases of urinary system || id:finn-b-N14_URINOTH	0.3386	finn-b-N14_URINOTH
rs985416	T	C	-0.023	0.0135	0.0901509	Other diseases of urinary system || id:finn-b-N14_URINOTH	0.8198	finn-b-N14_URINOTH
rs2014785	T	C	0.0011	0.0106	0.9184	Other diseases of urinary system || id:finn-b-N14_URINOTH	0.4426	finn-b-N14_URINOTH
rs7635831	G	A	0.0099	0.0109	0.3621	Other diseases of urinary system || id:finn-b-N14_URINOTH	0.3773	finn-b-N14_URINOTH
rs74663707	C	T	-0.0197	0.0213	0.3566	Other diseases of urinary system || id:finn-b-N14_URINOTH	0.06608	finn-b-N14_URINOTH
rs2367850	G	C	-0.001	0.0128	0.9365	Other diseases of urinary system || id:finn-b-N14_URINOTH	0.2224	finn-b-N14_URINOTH
rs10801803	G	A	-0.0035	0.0149	0.815	Other diseases of urinary system || id:finn-b-N14_URINOTH	0.1435	finn-b-N14_URINOTH
rs1241171	G	A	0.0158	0.0148	0.2871	Other diseases of urinary system || id:finn-b-N14_URINOTH	0.1444	finn-b-N14_URINOTH
rs10917203	A	C	-0.0188	0.0107	0.0788606	Other diseases of urinary system || id:finn-b-N14_URINOTH	0.3933	finn-b-N14_URINOTH
rs270727	G	C	0.0026	0.0113	0.8182	Other diseases of urinary system || id:finn-b-N14_URINOTH	0.3256	finn-b-N14_URINOTH
rs10923018	G	A	0.0229	0.0105	0.0295502	Other diseases of urinary system || id:finn-b-N14_URINOTH	0.5782	finn-b-N14_URINOTH
rs72730932	C	A	-0.0218	0.0179	0.2248	Other diseases of urinary system || id:finn-b-N14_URINOTH	0.09377	finn-b-N14_URINOTH
rs16861661	G	A	-0.0001	0.0211	0.9956	Other diseases of urinary system || id:finn-b-N14_URINOTH	0.06662	finn-b-N14_URINOTH
rs550351	A	C	0.0177	0.0105	0.0924209	Other diseases of urinary system || id:finn-b-N14_URINOTH	0.425	finn-b-N14_URINOTH
rs302266	T	C	-0.0014	0.0157	0.9272	Other diseases of urinary system || id:finn-b-N14_URINOTH	0.1276	finn-b-N14_URINOTH
rs12129908	A	C	-0.0038	0.0106	0.7227	Other diseases of urinary system || id:finn-b-N14_URINOTH	0.602	finn-b-N14_URINOTH
rs6427992	C	G	-0.0175	0.0108	0.1049	Other diseases of urinary system || id:finn-b-N14_URINOTH	0.6319	finn-b-N14_URINOTH
rs10517600	G	T	-0.0023	0.0107	0.8305	Other diseases of urinary system || id:finn-b-N14_URINOTH	0.3812	finn-b-N14_URINOTH
rs11938607	C	T	-0.0078	0.012	0.516699	Other diseases of urinary system || id:finn-b-N14_URINOTH	0.7474	finn-b-N14_URINOTH
rs6555306	C	T	0.0191	0.0149	0.2003	Other diseases of urinary system || id:finn-b-N14_URINOTH	0.8585	finn-b-N14_URINOTH
rs67078837	T	C	-0.0149	0.0106	0.1583	Other diseases of urinary system || id:finn-b-N14_URINOTH	0.4175	finn-b-N14_URINOTH
rs3733511	A	G	-0.0064	0.0114	0.5755	Other diseases of urinary system || id:finn-b-N14_URINOTH	0.2993	finn-b-N14_URINOTH
rs13116360	T	C	0.0451	0.0212	0.0333096	Other diseases of urinary system || id:finn-b-N14_URINOTH	0.06682	finn-b-N14_URINOTH
rs74354280	C	T	0.0038	0.0116	0.742499	Other diseases of urinary system || id:finn-b-N14_URINOTH	0.279	finn-b-N14_URINOTH
rs77304857	C	A	-0.0009	0.0132	0.9466	Other diseases of urinary system || id:finn-b-N14_URINOTH	0.1937	finn-b-N14_URINOTH
rs13139592	T	C	0.027	0.0154	0.0801198	Other diseases of urinary system || id:finn-b-N14_URINOTH	0.1326	finn-b-N14_URINOTH
rs12642039	C	T	0.0263	0.0109	0.01547	Other diseases of urinary system || id:finn-b-N14_URINOTH	0.6367	finn-b-N14_URINOTH
rs17706273	T	C	0.0086	0.0194	0.6562	Other diseases of urinary system || id:finn-b-N14_URINOTH	0.07849	finn-b-N14_URINOTH
rs6776814	T	C	-0.029	0.0368	0.431	Other diseases of urinary system || id:finn-b-N14_URINOTH	0.02046	finn-b-N14_URINOTH
rs2057922	C	G	0.0002	0.0142	0.99	Other diseases of urinary system || id:finn-b-N14_URINOTH	0.839	finn-b-N14_URINOTH
rs9393920	G	A	-0.0097	0.011	0.3776	Other diseases of urinary system || id:finn-b-N14_URINOTH	0.6214	finn-b-N14_URINOTH
rs9345168	A	C	-0.0024	0.0105	0.818	Other diseases of urinary system || id:finn-b-N14_URINOTH	0.5581	finn-b-N14_URINOTH
rs76181748	C	T	-0.0254	0.0125	0.0411197	Other diseases of urinary system || id:finn-b-N14_URINOTH	0.2302	finn-b-N14_URINOTH
rs4263802	A	G	-0.0069	0.0111	0.5369	Other diseases of urinary system || id:finn-b-N14_URINOTH	0.6715	finn-b-N14_URINOTH
rs34187114	C	A	-0.0125	0.0166	0.4519	Other diseases of urinary system || id:finn-b-N14_URINOTH	0.1109	finn-b-N14_URINOTH
rs7000472	G	A	-0.005	0.0106	0.6356	Other diseases of urinary system || id:finn-b-N14_URINOTH	0.5837	finn-b-N14_URINOTH
rs2435610	A	C	0.005	0.012	0.6771	Other diseases of urinary system || id:finn-b-N14_URINOTH	0.252	finn-b-N14_URINOTH
rs10093869	A	G	-0.0102	0.0106	0.3357	Other diseases of urinary system || id:finn-b-N14_URINOTH	0.4226	finn-b-N14_URINOTH
rs75200530	T	G	-0.0171	0.0311	0.582599	Other diseases of urinary system || id:finn-b-N14_URINOTH	0.02941	finn-b-N14_URINOTH
rs112893842	T	C	0.0205	0.0183	0.262	Other diseases of urinary system || id:finn-b-N14_URINOTH	0.08979	finn-b-N14_URINOTH
rs10512344	C	G	0.0161	0.0376	0.669	Other diseases of urinary system || id:finn-b-N14_URINOTH	0.01939	finn-b-N14_URINOTH
rs10759623	C	T	0.0141	0.0125	0.2579	Other diseases of urinary system || id:finn-b-N14_URINOTH	0.2269	finn-b-N14_URINOTH
rs4129395	G	A	0.0002	0.0104	0.9842	Other diseases of urinary system || id:finn-b-N14_URINOTH	0.4848	finn-b-N14_URINOTH
rs12346653	C	T	-0.0085	0.0128	0.5071	Other diseases of urinary system || id:finn-b-N14_URINOTH	0.2112	finn-b-N14_URINOTH
rs2933324	G	A	-0.0015	0.0124	0.9017	Other diseases of urinary system || id:finn-b-N14_URINOTH	0.7727	finn-b-N14_URINOTH
rs12555298	G	A	-0.0059	0.0138	0.6709	Other diseases of urinary system || id:finn-b-N14_URINOTH	0.1732	finn-b-N14_URINOTH
rs495004	C	G	0.0055	0.0125	0.6592	Other diseases of urinary system || id:finn-b-N14_URINOTH	0.2269	finn-b-N14_URINOTH
rs72747231	C	G	-0.033	0.0247	0.1812	Other diseases of urinary system || id:finn-b-N14_URINOTH	0.04777	finn-b-N14_URINOTH
rs62547233	A	G	-0.0168	0.0116	0.1466	Other diseases of urinary system || id:finn-b-N14_URINOTH	0.2845	finn-b-N14_URINOTH
rs2039204	A	T	0.0069	0.0109	0.5246	Other diseases of urinary system || id:finn-b-N14_URINOTH	0.6405	finn-b-N14_URINOTH
rs592514	T	A	0.0127	0.0158	0.4219	Other diseases of urinary system || id:finn-b-N14_URINOTH	0.1262	finn-b-N14_URINOTH
rs12341505	G	A	0.0085	0.0179	0.6351	Other diseases of urinary system || id:finn-b-N14_URINOTH	0.09349	finn-b-N14_URINOTH
rs58681734	A	G	-0.0057	0.0128	0.658901	Other diseases of urinary system || id:finn-b-N14_URINOTH	0.2124	finn-b-N14_URINOTH
rs10444197	A	G	0.0124	0.0109	0.2584	Other diseases of urinary system || id:finn-b-N14_URINOTH	0.3477	finn-b-N14_URINOTH
rs4364940	A	G	0.0204	0.0113	0.0696594	Other diseases of urinary system || id:finn-b-N14_URINOTH	0.3055	finn-b-N14_URINOTH
rs77968078	G	A	0.0203	0.0219	0.3528	Other diseases of urinary system || id:finn-b-N14_URINOTH	0.06087	finn-b-N14_URINOTH
rs2759329	A	G	-0.0158	0.0108	0.1453	Other diseases of urinary system || id:finn-b-N14_URINOTH	0.6311	finn-b-N14_URINOTH
rs6542556	G	A	-0.0074	0.0108	0.4907	Other diseases of urinary system || id:finn-b-N14_URINOTH	0.6189	finn-b-N14_URINOTH
rs934940	A	C	-0.0165	0.0154	0.2824	Other diseases of urinary system || id:finn-b-N14_URINOTH	0.1331	finn-b-N14_URINOTH
rs7570971	A	C	-0.0113	0.0106	0.2894	Other diseases of urinary system || id:finn-b-N14_URINOTH	0.412	finn-b-N14_URINOTH
rs3851328	G	T	-0.0085	0.0126	0.499401	Other diseases of urinary system || id:finn-b-N14_URINOTH	0.777	finn-b-N14_URINOTH
rs16851319	G	C	-0.0212	0.0138	0.1258	Other diseases of urinary system || id:finn-b-N14_URINOTH	0.1778	finn-b-N14_URINOTH
rs61823518	A	C	-0.0157	0.0171	0.3572	Other diseases of urinary system || id:finn-b-N14_URINOTH	0.106	finn-b-N14_URINOTH
rs6679026	T	C	-0.0146	0.0173	0.3963	Other diseases of urinary system || id:finn-b-N14_URINOTH	0.1008	finn-b-N14_URINOTH
rs12038887	C	G	-0.0035	0.0154	0.8187	Other diseases of urinary system || id:finn-b-N14_URINOTH	0.1355	finn-b-N14_URINOTH
rs17474256	G	A	0.0043	0.0176	0.8079	Other diseases of urinary system || id:finn-b-N14_URINOTH	0.09787	finn-b-N14_URINOTH
rs3860225	A	G	-0.0167	0.0181	0.3564	Other diseases of urinary system || id:finn-b-N14_URINOTH	0.0906	finn-b-N14_URINOTH
rs6677933	C	T	0.0177	0.0148	0.2327	Other diseases of urinary system || id:finn-b-N14_URINOTH	0.1469	finn-b-N14_URINOTH
rs143694765	T	C	-0.0058	0.0173	0.7376	Other diseases of urinary system || id:finn-b-N14_URINOTH	0.1027	finn-b-N14_URINOTH
rs6674304	C	T	0.0224	0.0275	0.4147	Other diseases of urinary system || id:finn-b-N14_URINOTH	0.03842	finn-b-N14_URINOTH
rs9919338	G	C	0.0215	0.0105	0.0402096	Other diseases of urinary system || id:finn-b-N14_URINOTH	0.4382	finn-b-N14_URINOTH
rs9428102	A	G	0.0088	0.0126	0.4828	Other diseases of urinary system || id:finn-b-N14_URINOTH	0.2175	finn-b-N14_URINOTH
rs11264403	G	A	0.0257	0.0198	0.1937	Other diseases of urinary system || id:finn-b-N14_URINOTH	0.07562	finn-b-N14_URINOTH
rs147475196	A	G	0.0055	0.0171	0.7474	Other diseases of urinary system || id:finn-b-N14_URINOTH	0.1069	finn-b-N14_URINOTH
rs9870933	G	A	0.0027	0.0107	0.7981	Other diseases of urinary system || id:finn-b-N14_URINOTH	0.6042	finn-b-N14_URINOTH
rs949971	T	G	-0.0007	0.0111	0.9464	Other diseases of urinary system || id:finn-b-N14_URINOTH	0.3249	finn-b-N14_URINOTH
rs12490337	C	G	-0.0003	0.013	0.9792	Other diseases of urinary system || id:finn-b-N14_URINOTH	0.1982	finn-b-N14_URINOTH
rs2686326	T	C	0.0113	0.0107	0.2884	Other diseases of urinary system || id:finn-b-N14_URINOTH	0.4049	finn-b-N14_URINOTH
rs113379006	T	C	-0.0188	0.0138	0.1723	Other diseases of urinary system || id:finn-b-N14_URINOTH	0.1762	finn-b-N14_URINOTH
rs9823439	C	T	-0.0178	0.0105	0.0898008	Other diseases of urinary system || id:finn-b-N14_URINOTH	0.5382	finn-b-N14_URINOTH
rs13070736	A	C	-0.0154	0.0141	0.274	Other diseases of urinary system || id:finn-b-N14_URINOTH	0.1644	finn-b-N14_URINOTH
rs17065783	A	G	-0.0166	0.0143	0.2469	Other diseases of urinary system || id:finn-b-N14_URINOTH	0.1581	finn-b-N14_URINOTH
rs16910295	T	C	0.0142	0.0231	0.5394	Other diseases of urinary system || id:finn-b-N14_URINOTH	0.0551	finn-b-N14_URINOTH
rs75140805	T	G	-0.0096	0.0138	0.488	Other diseases of urinary system || id:finn-b-N14_URINOTH	0.1803	finn-b-N14_URINOTH
rs3999074	G	T	0.0064	0.0105	0.5396	Other diseases of urinary system || id:finn-b-N14_URINOTH	0.494	finn-b-N14_URINOTH
rs116974815	C	A	-0.011	0.021	0.598199	Other diseases of urinary system || id:finn-b-N14_URINOTH	0.06887	finn-b-N14_URINOTH
rs10750258	C	A	-0.0133	0.0108	0.2207	Other diseases of urinary system || id:finn-b-N14_URINOTH	0.6337	finn-b-N14_URINOTH
rs2884897	A	G	-0.0375	0.0284	0.1868	Other diseases of urinary system || id:finn-b-N14_URINOTH	0.0351	finn-b-N14_URINOTH
rs72901605	T	C	0.0155	0.0164	0.3457	Other diseases of urinary system || id:finn-b-N14_URINOTH	0.1149	finn-b-N14_URINOTH
rs2058609	G	A	-0.0039	0.0117	0.7402	Other diseases of urinary system || id:finn-b-N14_URINOTH	0.7231	finn-b-N14_URINOTH
rs73139629	A	C	0.0171	0.0181	0.343	Other diseases of urinary system || id:finn-b-N14_URINOTH	0.09224	finn-b-N14_URINOTH
rs11606187	A	G	0.0128	0.0149	0.392	Other diseases of urinary system || id:finn-b-N14_URINOTH	0.1447	finn-b-N14_URINOTH
rs607327	T	C	0.0162	0.0108	0.1333	Other diseases of urinary system || id:finn-b-N14_URINOTH	0.6265	finn-b-N14_URINOTH
rs4869133	G	A	0.0126	0.0138	0.361	Other diseases of urinary system || id:finn-b-N14_URINOTH	0.1774	finn-b-N14_URINOTH
rs1153990	A	G	0.0026	0.0113	0.8162	Other diseases of urinary system || id:finn-b-N14_URINOTH	0.315	finn-b-N14_URINOTH
rs62376424	C	T	-0.0041	0.0114	0.718399	Other diseases of urinary system || id:finn-b-N14_URINOTH	0.3054	finn-b-N14_URINOTH
rs10036909	C	T	0.0045	0.0266	0.8643	Other diseases of urinary system || id:finn-b-N14_URINOTH	0.04047	finn-b-N14_URINOTH
rs10857328	T	A	-0.0117	0.0116	0.3113	Other diseases of urinary system || id:finn-b-N14_URINOTH	0.2836	finn-b-N14_URINOTH
rs160061	G	A	-0.019	0.0104	0.0692197	Other diseases of urinary system || id:finn-b-N14_URINOTH	0.4807	finn-b-N14_URINOTH
rs7449320	C	A	0.0265	0.0124	0.0318999	Other diseases of urinary system || id:finn-b-N14_URINOTH	0.2328	finn-b-N14_URINOTH
rs209813	G	A	0.0193	0.0148	0.1926	Other diseases of urinary system || id:finn-b-N14_URINOTH	0.1452	finn-b-N14_URINOTH
rs11135366	C	G	-0.0189	0.0123	0.1245	Other diseases of urinary system || id:finn-b-N14_URINOTH	0.2372	finn-b-N14_URINOTH
rs2547978	G	A	0.0132	0.0108	0.2202	Other diseases of urinary system || id:finn-b-N14_URINOTH	0.6262	finn-b-N14_URINOTH
rs10065321	T	C	0.0144	0.0106	0.1731	Other diseases of urinary system || id:finn-b-N14_URINOTH	0.4145	finn-b-N14_URINOTH
rs11241747	T	C	-0.027	0.0115	0.01894	Other diseases of urinary system || id:finn-b-N14_URINOTH	0.6913	finn-b-N14_URINOTH
rs75430375	C	T	-0.0163	0.0251	0.5161	Other diseases of urinary system || id:finn-b-N14_URINOTH	0.04558	finn-b-N14_URINOTH
rs7742829	C	T	0.0006	0.0105	0.9568	Other diseases of urinary system || id:finn-b-N14_URINOTH	0.4367	finn-b-N14_URINOTH
rs13192624	T	C	0.0086	0.0122	0.482	Other diseases of urinary system || id:finn-b-N14_URINOTH	0.2435	finn-b-N14_URINOTH
rs73139538	G	A	0.0138	0.0308	0.653501	Other diseases of urinary system || id:finn-b-N14_URINOTH	0.03003	finn-b-N14_URINOTH
rs151257695	A	G	-0.0158	0.0204	0.4375	Other diseases of urinary system || id:finn-b-N14_URINOTH	0.07103	finn-b-N14_URINOTH
rs112764253	T	A	0.0315	0.0305	0.3008	Other diseases of urinary system || id:finn-b-N14_URINOTH	0.03061	finn-b-N14_URINOTH
rs78938557	T	C	0.0159	0.0311	0.6087	Other diseases of urinary system || id:finn-b-N14_URINOTH	0.03006	finn-b-N14_URINOTH
rs4073240	G	A	-0.0009	0.0107	0.9328	Other diseases of urinary system || id:finn-b-N14_URINOTH	0.3807	finn-b-N14_URINOTH
rs7801843	A	G	-0.0015	0.0145	0.9182	Other diseases of urinary system || id:finn-b-N14_URINOTH	0.1523	finn-b-N14_URINOTH
rs12668619	A	G	-0.0081	0.0111	0.4686	Other diseases of urinary system || id:finn-b-N14_URINOTH	0.3286	finn-b-N14_URINOTH
rs34985298	G	A	-0.0002	0.0111	0.9849	Other diseases of urinary system || id:finn-b-N14_URINOTH	0.3339	finn-b-N14_URINOTH
rs3801748	G	A	0.0068	0.0108	0.5325	Other diseases of urinary system || id:finn-b-N14_URINOTH	0.3625	finn-b-N14_URINOTH
rs11755180	C	G	-0.0031	0.0105	0.770999	Other diseases of urinary system || id:finn-b-N14_URINOTH	0.4554	finn-b-N14_URINOTH
rs6474958	G	A	-0.0216	0.0113	0.0547003	Other diseases of urinary system || id:finn-b-N14_URINOTH	0.6913	finn-b-N14_URINOTH
rs117452796	A	G	-0.0233	0.0302	0.4391	Other diseases of urinary system || id:finn-b-N14_URINOTH	0.03149	finn-b-N14_URINOTH
rs10809135	C	T	-0.0149	0.0106	0.1597	Other diseases of urinary system || id:finn-b-N14_URINOTH	0.5565	finn-b-N14_URINOTH
rs79585701	A	C	0.0027	0.015	0.8558	Other diseases of urinary system || id:finn-b-N14_URINOTH	0.1416	finn-b-N14_URINOTH
rs76680460	G	A	-0.059	0.0261	0.0237197	Other diseases of urinary system || id:finn-b-N14_URINOTH	0.04314	finn-b-N14_URINOTH
rs2482516	C	T	-0.0121	0.0126	0.3349	Other diseases of urinary system || id:finn-b-N14_URINOTH	0.2264	finn-b-N14_URINOTH
rs118104867	C	T	0.0033	0.0207	0.8712	Other diseases of urinary system || id:finn-b-N14_URINOTH	0.06941	finn-b-N14_URINOTH
rs13279148	G	A	0.0196	0.0166	0.2385	Other diseases of urinary system || id:finn-b-N14_URINOTH	0.111	finn-b-N14_URINOTH
rs2901723	A	C	0.0002	0.0105	0.9843	Other diseases of urinary system || id:finn-b-N14_URINOTH	0.4681	finn-b-N14_URINOTH
rs3303	T	C	-0.0174	0.0214	0.4179	Other diseases of urinary system || id:finn-b-N14_URINOTH	0.06447	finn-b-N14_URINOTH
rs2482038	C	A	-0.0132	0.0106	0.214	Other diseases of urinary system || id:finn-b-N14_URINOTH	0.4018	finn-b-N14_URINOTH
rs72814525	A	G	-0.0038	0.0122	0.753701	Other diseases of urinary system || id:finn-b-N14_URINOTH	0.2438	finn-b-N14_URINOTH
rs7916711	A	G	0.0084	0.0151	0.575999	Other diseases of urinary system || id:finn-b-N14_URINOTH	0.1382	finn-b-N14_URINOTH
rs10899911	A	G	-0.003	0.0124	0.8073	Other diseases of urinary system || id:finn-b-N14_URINOTH	0.2346	finn-b-N14_URINOTH
rs2532663	A	G	0.0197	0.0174	0.2581	Other diseases of urinary system || id:finn-b-N14_URINOTH	0.8981	finn-b-N14_URINOTH
rs11199734	A	T	0.0093	0.0126	0.4598	Other diseases of urinary system || id:finn-b-N14_URINOTH	0.2208	finn-b-N14_URINOTH
rs2290844	C	T	0.0025	0.0165	0.8805	Other diseases of urinary system || id:finn-b-N14_URINOTH	0.1131	finn-b-N14_URINOTH
rs150600492	A	C	-0.013	0.0226	0.5659	Other diseases of urinary system || id:finn-b-N14_URINOTH	0.05764	finn-b-N14_URINOTH
rs35890118	A	G	0.0075	0.012	0.5336	Other diseases of urinary system || id:finn-b-N14_URINOTH	0.2535	finn-b-N14_URINOTH
rs2032031	G	A	0.0082	0.0104	0.4345	Other diseases of urinary system || id:finn-b-N14_URINOTH	0.4932	finn-b-N14_URINOTH
rs72850165	T	C	-0.006	0.0195	0.7587	Other diseases of urinary system || id:finn-b-N14_URINOTH	0.07741	finn-b-N14_URINOTH
rs12362320	G	C	0.0072	0.0106	0.4996	Other diseases of urinary system || id:finn-b-N14_URINOTH	0.4254	finn-b-N14_URINOTH
rs11030569	A	T	0.0033	0.0158	0.8333	Other diseases of urinary system || id:finn-b-N14_URINOTH	0.1274	finn-b-N14_URINOTH
rs4396289	C	T	0.018	0.0156	0.2475	Other diseases of urinary system || id:finn-b-N14_URINOTH	0.1286	finn-b-N14_URINOTH
rs10741777	T	C	0.0171	0.0113	0.1301	Other diseases of urinary system || id:finn-b-N14_URINOTH	0.3081	finn-b-N14_URINOTH
rs11228830	A	G	0.0199	0.0193	0.3021	Other diseases of urinary system || id:finn-b-N14_URINOTH	0.08544	finn-b-N14_URINOTH
rs11257188	A	C	0.0007	0.0156	0.9656	Other diseases of urinary system || id:finn-b-N14_URINOTH	0.133	finn-b-N14_URINOTH
rs10904297	A	G	-0.0764	0.0364	0.03586	Other diseases of urinary system || id:finn-b-N14_URINOTH	0.02125	finn-b-N14_URINOTH
rs15256	C	T	0.004	0.0161	0.8027	Other diseases of urinary system || id:finn-b-N14_URINOTH	0.1177	finn-b-N14_URINOTH
rs4731451	G	A	0.0223	0.0112	0.0464098	Other diseases of urinary system || id:finn-b-N14_URINOTH	0.3162	finn-b-N14_URINOTH
rs17167098	G	A	-0.0013	0.0152	0.932	Other diseases of urinary system || id:finn-b-N14_URINOTH	0.1364	finn-b-N14_URINOTH
rs7341608	T	C	-0.0116	0.0153	0.4499	Other diseases of urinary system || id:finn-b-N14_URINOTH	0.1341	finn-b-N14_URINOTH
rs72647089	T	G	0.0184	0.0192	0.3391	Other diseases of urinary system || id:finn-b-N14_URINOTH	0.08013	finn-b-N14_URINOTH
rs2599390	G	A	-0.0057	0.0158	0.7196	Other diseases of urinary system || id:finn-b-N14_URINOTH	0.1245	finn-b-N14_URINOTH
rs4990837	G	A	-0.0009	0.0132	0.947	Other diseases of urinary system || id:finn-b-N14_URINOTH	0.8034	finn-b-N14_URINOTH
rs7802841	A	C	-0.0037	0.0114	0.7465	Other diseases of urinary system || id:finn-b-N14_URINOTH	0.697	finn-b-N14_URINOTH
rs11769002	G	A	0.0019	0.0106	0.8565	Other diseases of urinary system || id:finn-b-N14_URINOTH	0.4154	finn-b-N14_URINOTH
rs2613606	T	C	-0.0224	0.0106	0.0337699	Other diseases of urinary system || id:finn-b-N14_URINOTH	0.5815	finn-b-N14_URINOTH
rs75208022	C	T	0.0022	0.0179	0.9006	Other diseases of urinary system || id:finn-b-N14_URINOTH	0.09347	finn-b-N14_URINOTH
rs7975087	C	A	0.0196	0.0137	0.1533	Other diseases of urinary system || id:finn-b-N14_URINOTH	0.1757	finn-b-N14_URINOTH
rs117748144	T	C	0.0026	0.0238	0.9119	Other diseases of urinary system || id:finn-b-N14_URINOTH	0.05075	finn-b-N14_URINOTH
rs7935775	T	A	0.0105	0.0119	0.3788	Other diseases of urinary system || id:finn-b-N14_URINOTH	0.735	finn-b-N14_URINOTH
rs4936098	G	A	-0.0212	0.0109	0.0522697	Other diseases of urinary system || id:finn-b-N14_URINOTH	0.6512	finn-b-N14_URINOTH
rs72771021	C	T	-0.0336	0.0207	0.1058	Other diseases of urinary system || id:finn-b-N14_URINOTH	0.06913	finn-b-N14_URINOTH
rs11166701	G	A	0.0037	0.0105	0.726599	Other diseases of urinary system || id:finn-b-N14_URINOTH	0.5104	finn-b-N14_URINOTH
rs2132128	G	A	-0.0002	0.0174	0.9905	Other diseases of urinary system || id:finn-b-N14_URINOTH	0.1028	finn-b-N14_URINOTH
rs28540839	A	C	-0.0095	0.0105	0.3655	Other diseases of urinary system || id:finn-b-N14_URINOTH	0.4755	finn-b-N14_URINOTH
rs117020988	C	T	0.0107	0.0191	0.5753	Other diseases of urinary system || id:finn-b-N14_URINOTH	0.0804	finn-b-N14_URINOTH
rs957755	T	G	0.0226	0.015	0.1321	Other diseases of urinary system || id:finn-b-N14_URINOTH	0.1395	finn-b-N14_URINOTH
rs4146653	G	A	-0.0094	0.015	0.5305	Other diseases of urinary system || id:finn-b-N14_URINOTH	0.1416	finn-b-N14_URINOTH
rs4242783	A	G	-0.0036	0.0116	0.7591	Other diseases of urinary system || id:finn-b-N14_URINOTH	0.7166	finn-b-N14_URINOTH
rs117107102	A	G	-0.0466	0.0245	0.0577006	Other diseases of urinary system || id:finn-b-N14_URINOTH	0.0476	finn-b-N14_URINOTH
rs2872237	A	C	-0.0019	0.0107	0.8553	Other diseases of urinary system || id:finn-b-N14_URINOTH	0.6006	finn-b-N14_URINOTH
rs7252711	G	A	0.0139	0.0167	0.4074	Other diseases of urinary system || id:finn-b-N14_URINOTH	0.8906	finn-b-N14_URINOTH
rs10417872	G	T	-0.0135	0.0115	0.2428	Other diseases of urinary system || id:finn-b-N14_URINOTH	0.7153	finn-b-N14_URINOTH
rs999354	T	A	-0.0028	0.0108	0.7979	Other diseases of urinary system || id:finn-b-N14_URINOTH	0.3714	finn-b-N14_URINOTH
rs17114848	G	A	0.027	0.0176	0.1249	Other diseases of urinary system || id:finn-b-N14_URINOTH	0.09898	finn-b-N14_URINOTH
rs4783173	G	C	0.0039	0.0107	0.716699	Other diseases of urinary system || id:finn-b-N14_URINOTH	0.6071	finn-b-N14_URINOTH
rs1997204	C	T	0.0018	0.0251	0.9414	Other diseases of urinary system || id:finn-b-N14_URINOTH	0.9552	finn-b-N14_URINOTH
rs6514318	T	C	-0.0265	0.0246	0.2827	Other diseases of urinary system || id:finn-b-N14_URINOTH	0.04789	finn-b-N14_URINOTH
rs6048195	A	T	-0.0058	0.011	0.596499	Other diseases of urinary system || id:finn-b-N14_URINOTH	0.4208	finn-b-N14_URINOTH
rs17619981	T	G	0.0044	0.0153	0.7728	Other diseases of urinary system || id:finn-b-N14_URINOTH	0.1349	finn-b-N14_URINOTH
rs7249614	G	A	-0.006	0.0107	0.577	Other diseases of urinary system || id:finn-b-N14_URINOTH	0.6084	finn-b-N14_URINOTH
rs10424197	A	G	0.0199	0.0121	0.0991197	Other diseases of urinary system || id:finn-b-N14_URINOTH	0.7431	finn-b-N14_URINOTH
rs4028634	C	T	0.0023	0.0108	0.8308	Other diseases of urinary system || id:finn-b-N14_URINOTH	0.6349	finn-b-N14_URINOTH
rs7225245	A	G	-0.0338	0.0106	0.00145801	Other diseases of urinary system || id:finn-b-N14_URINOTH	0.5711	finn-b-N14_URINOTH
rs8066522	A	G	0.012	0.0111	0.282	Other diseases of urinary system || id:finn-b-N14_URINOTH	0.6682	finn-b-N14_URINOTH
rs6501525	A	G	-0.0069	0.0111	0.5324	Other diseases of urinary system || id:finn-b-N14_URINOTH	0.3402	finn-b-N14_URINOTH
rs35161940	T	C	0.0361	0.0169	0.0327499	Other diseases of urinary system || id:finn-b-N14_URINOTH	0.1071	finn-b-N14_URINOTH
rs12911842	A	T	-0.0059	0.0188	0.7516	Other diseases of urinary system || id:finn-b-N14_URINOTH	0.08446	finn-b-N14_URINOTH
rs28678345	T	C	0.0007	0.0244	0.9775	Other diseases of urinary system || id:finn-b-N14_URINOTH	0.04904	finn-b-N14_URINOTH
rs2154047	A	C	-0.0058	0.0184	0.7541	Other diseases of urinary system || id:finn-b-N14_URINOTH	0.9117	finn-b-N14_URINOTH
rs9981767	A	C	0.005	0.012	0.6766	Other diseases of urinary system || id:finn-b-N14_URINOTH	0.2583	finn-b-N14_URINOTH
rs2838334	G	A	0.0198	0.011	0.0713592	Other diseases of urinary system || id:finn-b-N14_URINOTH	0.344	finn-b-N14_URINOTH
rs4462860	G	A	-0.0039	0.0107	0.715801	Other diseases of urinary system || id:finn-b-N14_URINOTH	0.3969	finn-b-N14_URINOTH
rs757872	C	G	-0.0232	0.0139	0.0967008	Other diseases of urinary system || id:finn-b-N14_URINOTH	0.8284	finn-b-N14_URINOTH
rs6000536	C	T	-0.015	0.014	0.2812	Other diseases of urinary system || id:finn-b-N14_URINOTH	0.1688	finn-b-N14_URINOTH
rs739151	G	C	-0.0054	0.0104	0.606001	Other diseases of urinary system || id:finn-b-N14_URINOTH	0.4845	finn-b-N14_URINOTH
rs13417181	T	C	0.0023	0.0125	0.8549	Other diseases of urinary system || id:finn-b-N14_URINOTH	0.2606	finn-b-N14_URINOTH
rs13412653	A	C	0.0027	0.0108	0.7998	Other diseases of urinary system || id:finn-b-N14_URINOTH	0.3711	finn-b-N14_URINOTH
rs72893646	A	T	-0.0247	0.0156	0.1125	Other diseases of urinary system || id:finn-b-N14_URINOTH	0.1286	finn-b-N14_URINOTH
rs7635189	A	G	-0.0013	0.0117	0.9087	Other diseases of urinary system || id:finn-b-N14_URINOTH	0.7109	finn-b-N14_URINOTH
rs9864379	T	C	0.0017	0.0147	0.9054	Other diseases of urinary system || id:finn-b-N14_URINOTH	0.1497	finn-b-N14_URINOTH
rs6442336	T	C	-0.0238	0.012	0.0479005	Other diseases of urinary system || id:finn-b-N14_URINOTH	0.7479	finn-b-N14_URINOTH
rs2831909	C	T	-0.0002	0.016	0.9877	Other diseases of urinary system || id:finn-b-N14_URINOTH	0.8777	finn-b-N14_URINOTH
rs1882878	A	G	-0.0075	0.0114	0.5119	Other diseases of urinary system || id:finn-b-N14_URINOTH	0.2984	finn-b-N14_URINOTH
rs8130320	A	G	0.0034	0.0105	0.7449	Other diseases of urinary system || id:finn-b-N14_URINOTH	0.5597	finn-b-N14_URINOTH
rs738193	T	C	-0.0063	0.0109	0.561	Other diseases of urinary system || id:finn-b-N14_URINOTH	0.3538	finn-b-N14_URINOTH
rs4822789	G	C	0.0119	0.0107	0.2654	Other diseases of urinary system || id:finn-b-N14_URINOTH	0.3875	finn-b-N14_URINOTH
rs4617108	G	A	-0.005	0.0187	0.7903	Other diseases of urinary system || id:finn-b-N14_URINOTH	0.9142	finn-b-N14_URINOTH
rs78453362	A	G	0.0311	0.0333	0.3505	Other diseases of urinary system || id:finn-b-N14_URINOTH	0.02544	finn-b-N14_URINOTH
rs11700976	C	A	-0.0185	0.0105	0.0770708	Other diseases of urinary system || id:finn-b-N14_URINOTH	0.4933	finn-b-N14_URINOTH
rs77599476	A	G	0.0094	0.0228	0.6789	Other diseases of urinary system || id:finn-b-N14_URINOTH	0.05594	finn-b-N14_URINOTH
rs55682560	C	T	0.0211	0.0195	0.2808	Other diseases of urinary system || id:finn-b-N14_URINOTH	0.07761	finn-b-N14_URINOTH
rs12147596	C	T	-0.0045	0.0113	0.687401	Other diseases of urinary system || id:finn-b-N14_URINOTH	0.3166	finn-b-N14_URINOTH
rs7333521	T	C	-0.008	0.0294	0.787	Other diseases of urinary system || id:finn-b-N14_URINOTH	0.03207	finn-b-N14_URINOTH
rs12876183	T	A	-0.0011	0.011	0.921	Other diseases of urinary system || id:finn-b-N14_URINOTH	0.3464	finn-b-N14_URINOTH
rs9602779	A	C	0.0126	0.0122	0.2988	Other diseases of urinary system || id:finn-b-N14_URINOTH	0.2416	finn-b-N14_URINOTH
rs7164160	A	T	0.0241	0.0136	0.0765103	Other diseases of urinary system || id:finn-b-N14_URINOTH	0.1796	finn-b-N14_URINOTH
rs57512504	T	A	-0.0041	0.0105	0.698499	Other diseases of urinary system || id:finn-b-N14_URINOTH	0.4312	finn-b-N14_URINOTH
rs55858165	A	C	0.0001	0.0276	0.996	Other diseases of urinary system || id:finn-b-N14_URINOTH	0.03779	finn-b-N14_URINOTH
rs60775321	T	C	-0.019	0.0115	0.1006	Other diseases of urinary system || id:finn-b-N14_URINOTH	0.2902	finn-b-N14_URINOTH
rs9565219	T	A	-0.0007	0.0106	0.9465	Other diseases of urinary system || id:finn-b-N14_URINOTH	0.4169	finn-b-N14_URINOTH
rs1929743	T	C	-0.0189	0.011	0.0860895	Other diseases of urinary system || id:finn-b-N14_URINOTH	0.3364	finn-b-N14_URINOTH
rs10414815	C	T	0.0024	0.025	0.9246	Other diseases of urinary system || id:finn-b-N14_URINOTH	0.9532	finn-b-N14_URINOTH
rs17296933	C	G	0.0164	0.0165	0.3212	Other diseases of urinary system || id:finn-b-N14_URINOTH	0.1138	finn-b-N14_URINOTH
rs10423795	T	C	0.0053	0.0108	0.6201	Other diseases of urinary system || id:finn-b-N14_URINOTH	0.6163	finn-b-N14_URINOTH
rs78410648	A	G	-0.0116	0.0168	0.4891	Other diseases of urinary system || id:finn-b-N14_URINOTH	0.1092	finn-b-N14_URINOTH
rs45480394	T	G	0.0165	0.0109	0.1292	Other diseases of urinary system || id:finn-b-N14_URINOTH	0.3602	finn-b-N14_URINOTH
rs1002941	A	G	0	0.0121	0.9974	Other diseases of urinary system || id:finn-b-N14_URINOTH	0.7545	finn-b-N14_URINOTH
rs7184125	T	C	0.0236	0.0117	0.04343	Other diseases of urinary system || id:finn-b-N14_URINOTH	0.292	finn-b-N14_URINOTH
rs761240	G	T	0.0395	0.0242	0.103	Other diseases of urinary system || id:finn-b-N14_URINOTH	0.9492	finn-b-N14_URINOTH
rs8113760	G	A	-0.0016	0.0113	0.888	Other diseases of urinary system || id:finn-b-N14_URINOTH	0.31	finn-b-N14_URINOTH
rs4802933	G	A	-0.0078	0.0124	0.5311	Other diseases of urinary system || id:finn-b-N14_URINOTH	0.7677	finn-b-N14_URINOTH
rs73615400	T	C	0.0204	0.0177	0.2489	Other diseases of urinary system || id:finn-b-N14_URINOTH	0.09663	finn-b-N14_URINOTH
rs10402491	C	T	0.0086	0.014	0.5405	Other diseases of urinary system || id:finn-b-N14_URINOTH	0.1684	finn-b-N14_URINOTH
rs6058181	C	T	-0.0161	0.0142	0.2568	Other diseases of urinary system || id:finn-b-N14_URINOTH	0.1619	finn-b-N14_URINOTH
rs1205443	A	G	0.0011	0.011	0.919	Other diseases of urinary system || id:finn-b-N14_URINOTH	0.352	finn-b-N14_URINOTH
rs67737557	C	G	-0.0189	0.0131	0.1473	Other diseases of urinary system || id:finn-b-N14_URINOTH	0.198	finn-b-N14_URINOTH
rs6064552	T	C	-0.0227	0.0135	0.0925593	Other diseases of urinary system || id:finn-b-N14_URINOTH	0.1829	finn-b-N14_URINOTH
rs11108500	A	G	0.0219	0.0186	0.2388	Other diseases of urinary system || id:finn-b-N14_URINOTH	0.08814	finn-b-N14_URINOTH
rs11841382	G	T	0.0035	0.0189	0.8542	Other diseases of urinary system || id:finn-b-N14_URINOTH	0.0832	finn-b-N14_URINOTH
rs9316536	T	G	0.0311	0.015	0.0383601	Other diseases of urinary system || id:finn-b-N14_URINOTH	0.1446	finn-b-N14_URINOTH
rs11630875	T	C	-0.002	0.0157	0.8999	Other diseases of urinary system || id:finn-b-N14_URINOTH	0.127	finn-b-N14_URINOTH
rs12925026	T	C	-0.0143	0.0225	0.5232	Other diseases of urinary system || id:finn-b-N14_URINOTH	0.05676	finn-b-N14_URINOTH
rs73975615	G	A	-0.0482	0.0609	0.4292	Other diseases of urinary system || id:finn-b-N14_URINOTH	0.007504	finn-b-N14_URINOTH
rs394449	A	T	-0.0006	0.0155	0.9685	Other diseases of urinary system || id:finn-b-N14_URINOTH	0.1326	finn-b-N14_URINOTH
rs11080063	G	A	0.009	0.0106	0.3957	Other diseases of urinary system || id:finn-b-N14_URINOTH	0.405	finn-b-N14_URINOTH
rs2314294	T	C	-0.0044	0.0152	0.7709	Other diseases of urinary system || id:finn-b-N14_URINOTH	0.1357	finn-b-N14_URINOTH
rs62027366	T	C	0.0073	0.0131	0.5768	Other diseases of urinary system || id:finn-b-N14_URINOTH	0.2025	finn-b-N14_URINOTH
rs71386687	T	G	0.0186	0.0166	0.2621	Other diseases of urinary system || id:finn-b-N14_URINOTH	0.1166	finn-b-N14_URINOTH
rs12597105	A	G	-0.0075	0.0133	0.5756	Other diseases of urinary system || id:finn-b-N14_URINOTH	0.8112	finn-b-N14_URINOTH
rs11150282	T	C	-0.005	0.0109	0.6478	Other diseases of urinary system || id:finn-b-N14_URINOTH	0.3602	finn-b-N14_URINOTH
rs56188186	A	G	0.0307	0.0246	0.2113	Other diseases of urinary system || id:finn-b-N14_URINOTH	0.04822	finn-b-N14_URINOTH
rs758191	T	G	0.0019	0.0176	0.9118	Other diseases of urinary system || id:finn-b-N14_URINOTH	0.1018	finn-b-N14_URINOTH
rs79790072	T	C	0.0048	0.0302	0.8734	Other diseases of urinary system || id:finn-b-N14_URINOTH	0.0315	finn-b-N14_URINOTH
rs71405394	G	A	0.0118	0.0208	0.5686	Other diseases of urinary system || id:finn-b-N14_URINOTH	0.06837	finn-b-N14_URINOTH
rs60274479	T	C	0	0.0132	0.9992	Other diseases of urinary system || id:finn-b-N14_URINOTH	0.1982	finn-b-N14_URINOTH
rs369444	C	G	0.0091	0.0201	0.6497	Other diseases of urinary system || id:finn-b-N14_URINOTH	0.0727	finn-b-N14_URINOTH
rs73165080	T	A	0.0544	0.0263	0.0388696	Other diseases of urinary system || id:finn-b-N14_URINOTH	0.04209	finn-b-N14_URINOTH
rs9590927	A	G	-0.004	0.0105	0.7022	Other diseases of urinary system || id:finn-b-N14_URINOTH	0.546	finn-b-N14_URINOTH
rs2997412	G	A	-0.0046	0.0117	0.691399	Other diseases of urinary system || id:finn-b-N14_URINOTH	0.7202	finn-b-N14_URINOTH
rs2590913	A	G	0.0241	0.024	0.3147	Other diseases of urinary system || id:finn-b-N14_URINOTH	0.9473	finn-b-N14_URINOTH
rs73512608	G	A	0.0205	0.0232	0.3759	Other diseases of urinary system || id:finn-b-N14_URINOTH	0.05304	finn-b-N14_URINOTH
rs413827	G	A	-0.0251	0.0122	0.0405499	Other diseases of urinary system || id:finn-b-N14_URINOTH	0.2383	finn-b-N14_URINOTH
rs9300744	C	T	0.0204	0.0136	0.1336	Other diseases of urinary system || id:finn-b-N14_URINOTH	0.1792	finn-b-N14_URINOTH
rs9558661	T	C	0.0187	0.013	0.1513	Other diseases of urinary system || id:finn-b-N14_URINOTH	0.2039	finn-b-N14_URINOTH
rs8009993	G	C	0.0129	0.0146	0.3785	Other diseases of urinary system || id:finn-b-N14_URINOTH	0.154	finn-b-N14_URINOTH
rs75091807	G	T	-0.0133	0.0218	0.543	Other diseases of urinary system || id:finn-b-N14_URINOTH	0.06261	finn-b-N14_URINOTH
rs17530232	A	G	-0.0392	0.0235	0.0953498	Other diseases of urinary system || id:finn-b-N14_URINOTH	0.05282	finn-b-N14_URINOTH
rs2706242	G	C	-0.0256	0.0186	0.1691	Other diseases of urinary system || id:finn-b-N14_URINOTH	0.08534	finn-b-N14_URINOTH
rs17121075	G	A	-0.0047	0.0127	0.7145	Other diseases of urinary system || id:finn-b-N14_URINOTH	0.2144	finn-b-N14_URINOTH
rs7992246	C	T	-0.0022	0.0107	0.837	Other diseases of urinary system || id:finn-b-N14_URINOTH	0.6093	finn-b-N14_URINOTH
rs1954532	C	T	0.0067	0.0131	0.611599	Other diseases of urinary system || id:finn-b-N14_URINOTH	0.8001	finn-b-N14_URINOTH
rs112176119	C	T	0.0076	0.0182	0.6757	Other diseases of urinary system || id:finn-b-N14_URINOTH	0.09246	finn-b-N14_URINOTH
rs123059	C	T	-0.002	0.0127	0.8762	Other diseases of urinary system || id:finn-b-N14_URINOTH	0.7807	finn-b-N14_URINOTH
rs7221249	G	A	0.0012	0.0105	0.9072	Other diseases of urinary system || id:finn-b-N14_URINOTH	0.4694	finn-b-N14_URINOTH
rs2314810	G	C	-0.054	0.0246	0.0283798	Other diseases of urinary system || id:finn-b-N14_URINOTH	0.9528	finn-b-N14_URINOTH
rs1942371	G	A	-0.0004	0.016	0.9784	Other diseases of urinary system || id:finn-b-N14_URINOTH	0.1236	finn-b-N14_URINOTH
rs4797774	A	G	0.0013	0.0262	0.9592	Other diseases of urinary system || id:finn-b-N14_URINOTH	0.9562	finn-b-N14_URINOTH
rs76124218	C	G	-0.0242	0.0277	0.3823	Other diseases of urinary system || id:finn-b-N14_URINOTH	0.03688	finn-b-N14_URINOTH
rs72887800	T	A	0.0003	0.0107	0.9772	Other diseases of urinary system || id:finn-b-N14_URINOTH	0.4015	finn-b-N14_URINOTH
rs4793970	A	G	-0.0205	0.0109	0.0601105	Other diseases of urinary system || id:finn-b-N14_URINOTH	0.3631	finn-b-N14_URINOTH
rs789069	A	C	0.0045	0.015	0.7614	Other diseases of urinary system || id:finn-b-N14_URINOTH	0.1411	finn-b-N14_URINOTH
rs8085381	A	G	-0.013	0.0135	0.3364	Other diseases of urinary system || id:finn-b-N14_URINOTH	0.817	finn-b-N14_URINOTH
rs58850151	T	C	-0.0071	0.0118	0.547599	Other diseases of urinary system || id:finn-b-N14_URINOTH	0.2673	finn-b-N14_URINOTH
rs1484873	G	A	-0.0032	0.0147	0.8272	Other diseases of urinary system || id:finn-b-N14_URINOTH	0.8483	finn-b-N14_URINOTH
rs10774377	G	A	0.0006	0.0105	0.9517	Other diseases of urinary system || id:finn-b-N14_URINOTH	0.5641	finn-b-N14_URINOTH
rs11613919	G	T	-0.016	0.0126	0.2024	Other diseases of urinary system || id:finn-b-N14_URINOTH	0.2208	finn-b-N14_URINOTH
rs7960664	A	G	0.0079	0.0187	0.6726	Other diseases of urinary system || id:finn-b-N14_URINOTH	0.9146	finn-b-N14_URINOTH
rs12423772	G	T	-0.0028	0.015	0.8544	Other diseases of urinary system || id:finn-b-N14_URINOTH	0.151	finn-b-N14_URINOTH
rs4766997	C	T	-0.0091	0.0106	0.3883	Other diseases of urinary system || id:finn-b-N14_URINOTH	0.4248	finn-b-N14_URINOTH
rs7399658	G	A	-0.0218	0.0136	0.1098	Other diseases of urinary system || id:finn-b-N14_URINOTH	0.1835	finn-b-N14_URINOTH
rs4766410	T	C	0.0103	0.0119	0.387	Other diseases of urinary system || id:finn-b-N14_URINOTH	0.708	finn-b-N14_URINOTH
rs7976209	T	C	0.0053	0.0144	0.7114	Other diseases of urinary system || id:finn-b-N14_URINOTH	0.1551	finn-b-N14_URINOTH
rs73331712	T	C	0.0393	0.026	0.1312	Other diseases of urinary system || id:finn-b-N14_URINOTH	0.04143	finn-b-N14_URINOTH
rs10898797	C	T	-0.0004	0.0167	0.98	Other diseases of urinary system || id:finn-b-N14_URINOTH	0.1089	finn-b-N14_URINOTH
rs7119679	G	A	0.0026	0.0123	0.8323	Other diseases of urinary system || id:finn-b-N14_URINOTH	0.2429	finn-b-N14_URINOTH
rs2155352	A	G	-0.0009	0.0123	0.9434	Other diseases of urinary system || id:finn-b-N14_URINOTH	0.2355	finn-b-N14_URINOTH
rs143662916	C	T	-0.0161	0.0307	0.5999	Other diseases of urinary system || id:finn-b-N14_URINOTH	0.02957	finn-b-N14_URINOTH
rs7311004	C	T	-0.0134	0.0105	0.2012	Other diseases of urinary system || id:finn-b-N14_URINOTH	0.5562	finn-b-N14_URINOTH
rs6494306	A	G	0.0096	0.0112	0.3909	Other diseases of urinary system || id:finn-b-N14_URINOTH	0.3236	finn-b-N14_URINOTH
rs4264350	T	C	0.0017	0.0105	0.8673	Other diseases of urinary system || id:finn-b-N14_URINOTH	0.4599	finn-b-N14_URINOTH
rs12899991	T	A	-0.0046	0.0123	0.706	Other diseases of urinary system || id:finn-b-N14_URINOTH	0.7559	finn-b-N14_URINOTH
rs59414781	C	G	0.0046	0.0153	0.7642	Other diseases of urinary system || id:finn-b-N14_URINOTH	0.1339	finn-b-N14_URINOTH
rs694949	A	G	-0.0014	0.0178	0.9357	Other diseases of urinary system || id:finn-b-N14_URINOTH	0.09535	finn-b-N14_URINOTH
rs67490567	T	C	-0.0046	0.0121	0.704001	Other diseases of urinary system || id:finn-b-N14_URINOTH	0.2578	finn-b-N14_URINOTH
rs4461038	G	A	-0.0088	0.0115	0.4418	Other diseases of urinary system || id:finn-b-N14_URINOTH	0.7088	finn-b-N14_URINOTH
rs12585793	T	C	-0.016	0.0313	0.6096	Other diseases of urinary system || id:finn-b-N14_URINOTH	0.02898	finn-b-N14_URINOTH
rs9537886	A	C	0.0028	0.0105	0.7871	Other diseases of urinary system || id:finn-b-N14_URINOTH	0.4285	finn-b-N14_URINOTH
rs9542068	T	C	-0.0053	0.0111	0.6327	Other diseases of urinary system || id:finn-b-N14_URINOTH	0.3354	finn-b-N14_URINOTH
rs1980561	A	G	0	0.0105	0.9987	Other diseases of urinary system || id:finn-b-N14_URINOTH	0.4755	finn-b-N14_URINOTH
rs362417	G	C	-0.0024	0.0128	0.8534	Other diseases of urinary system || id:finn-b-N14_URINOTH	0.2113	finn-b-N14_URINOTH
rs10131942	C	G	-0.0099	0.0142	0.4829	Other diseases of urinary system || id:finn-b-N14_URINOTH	0.1637	finn-b-N14_URINOTH
rs77681628	C	T	-0.0235	0.0192	0.2209	Other diseases of urinary system || id:finn-b-N14_URINOTH	0.08164	finn-b-N14_URINOTH
rs7322368	C	T	0.0177	0.0182	0.3289	Other diseases of urinary system || id:finn-b-N14_URINOTH	0.9089	finn-b-N14_URINOTH
rs113054641	G	A	0.0003	0.0252	0.9913	Other diseases of urinary system || id:finn-b-N14_URINOTH	0.04447	finn-b-N14_URINOTH
rs111509883	T	C	-0.0042	0.0169	0.8044	Other diseases of urinary system || id:finn-b-N14_URINOTH	0.1113	finn-b-N14_URINOTH
rs11671100	A	C	0.0224	0.0131	0.0875709	Other diseases of urinary system || id:finn-b-N14_URINOTH	0.2053	finn-b-N14_URINOTH
rs146541147	G	A	0.0063	0.0293	0.8292	Other diseases of urinary system || id:finn-b-N14_URINOTH	0.03358	finn-b-N14_URINOTH
rs62112538	C	T	0.008	0.0167	0.6339	Other diseases of urinary system || id:finn-b-N14_URINOTH	0.1113	finn-b-N14_URINOTH
rs75211493	G	A	0.0275	0.0202	0.1748	Other diseases of urinary system || id:finn-b-N14_URINOTH	0.07214	finn-b-N14_URINOTH
rs62113381	T	C	-0.0174	0.0155	0.2618	Other diseases of urinary system || id:finn-b-N14_URINOTH	0.1309	finn-b-N14_URINOTH
rs6692542	G	A	0.0172	0.011	0.1188	Other diseases of urinary system || id:finn-b-N14_URINOTH	0.6348	finn-b-N14_URINOTH
rs4654122	G	C	-0.0108	0.0105	0.3017	Other diseases of urinary system || id:finn-b-N14_URINOTH	0.5417	finn-b-N14_URINOTH
rs4506496	A	G	-0.0064	0.0115	0.5807	Other diseases of urinary system || id:finn-b-N14_URINOTH	0.7074	finn-b-N14_URINOTH
rs72553859	G	C	-0.003	0.0142	0.8313	Other diseases of urinary system || id:finn-b-N14_URINOTH	0.1626	finn-b-N14_URINOTH
rs80319214	C	G	-0.0033	0.0202	0.8716	Other diseases of urinary system || id:finn-b-N14_URINOTH	0.07522	finn-b-N14_URINOTH
rs792108	C	T	0.0026	0.0106	0.8079	Other diseases of urinary system || id:finn-b-N14_URINOTH	0.5901	finn-b-N14_URINOTH
rs792058	G	A	0.0272	0.0106	0.0103001	Other diseases of urinary system || id:finn-b-N14_URINOTH	0.4365	finn-b-N14_URINOTH
rs716604	A	G	0.0016	0.0124	0.8997	Other diseases of urinary system || id:finn-b-N14_URINOTH	0.2292	finn-b-N14_URINOTH
rs10490280	C	T	-0.0144	0.0133	0.2798	Other diseases of urinary system || id:finn-b-N14_URINOTH	0.1881	finn-b-N14_URINOTH
rs62314653	C	A	0.0396	0.0222	0.0742694	Other diseases of urinary system || id:finn-b-N14_URINOTH	0.05945	finn-b-N14_URINOTH
rs115414803	A	C	-0.0343	0.0217	0.114	Other diseases of urinary system || id:finn-b-N14_URINOTH	0.06231	finn-b-N14_URINOTH
rs894996	C	A	0.0227	0.0204	0.2664	Other diseases of urinary system || id:finn-b-N14_URINOTH	0.06995	finn-b-N14_URINOTH
rs35740166	C	T	-0.013	0.0178	0.4656	Other diseases of urinary system || id:finn-b-N14_URINOTH	0.09557	finn-b-N14_URINOTH
rs12648235	T	C	-0.0157	0.0124	0.2047	Other diseases of urinary system || id:finn-b-N14_URINOTH	0.2366	finn-b-N14_URINOTH
rs2332027	A	G	-0.0111	0.0108	0.304	Other diseases of urinary system || id:finn-b-N14_URINOTH	0.4049	finn-b-N14_URINOTH
rs6815608	C	T	-0.0036	0.0145	0.8027	Other diseases of urinary system || id:finn-b-N14_URINOTH	0.8485	finn-b-N14_URINOTH
rs12501673	A	G	-0.0063	0.0118	0.592	Other diseases of urinary system || id:finn-b-N14_URINOTH	0.2747	finn-b-N14_URINOTH
rs959845	T	C	0.0002	0.0108	0.9868	Other diseases of urinary system || id:finn-b-N14_URINOTH	0.5731	finn-b-N14_URINOTH
rs4957061	T	C	-0.0348	0.0107	0.00111301	Other diseases of urinary system || id:finn-b-N14_URINOTH	0.4227	finn-b-N14_URINOTH
rs1074800	G	A	0.0133	0.0106	0.2083	Other diseases of urinary system || id:finn-b-N14_URINOTH	0.5812	finn-b-N14_URINOTH
rs7666190	A	C	-0.0117	0.0163	0.4717	Other diseases of urinary system || id:finn-b-N14_URINOTH	0.8842	finn-b-N14_URINOTH
rs111552159	C	G	0.0016	0.0255	0.9506	Other diseases of urinary system || id:finn-b-N14_URINOTH	0.04459	finn-b-N14_URINOTH
rs7572229	A	G	-0.0102	0.0104	0.3268	Other diseases of urinary system || id:finn-b-N14_URINOTH	0.4774	finn-b-N14_URINOTH
rs7573799	G	C	0.002	0.0145	0.8876	Other diseases of urinary system || id:finn-b-N14_URINOTH	0.8454	finn-b-N14_URINOTH
rs72819830	A	G	-0.0112	0.0317	0.724101	Other diseases of urinary system || id:finn-b-N14_URINOTH	0.02828	finn-b-N14_URINOTH
rs6550770	C	T	-0.0141	0.0262	0.590599	Other diseases of urinary system || id:finn-b-N14_URINOTH	0.9578	finn-b-N14_URINOTH
rs9809789	C	T	0.0087	0.0135	0.518601	Other diseases of urinary system || id:finn-b-N14_URINOTH	0.1827	finn-b-N14_URINOTH
rs9833771	C	T	0.0015	0.0105	0.8888	Other diseases of urinary system || id:finn-b-N14_URINOTH	0.4816	finn-b-N14_URINOTH
rs764177	C	A	-0.0029	0.0109	0.785899	Other diseases of urinary system || id:finn-b-N14_URINOTH	0.3674	finn-b-N14_URINOTH
rs4680035	G	A	-0.0048	0.0107	0.6511	Other diseases of urinary system || id:finn-b-N14_URINOTH	0.3858	finn-b-N14_URINOTH
rs76664262	T	A	-0.0072	0.0167	0.6659	Other diseases of urinary system || id:finn-b-N14_URINOTH	0.1109	finn-b-N14_URINOTH
rs76287110	A	T	0.0299	0.019	0.1163	Other diseases of urinary system || id:finn-b-N14_URINOTH	0.0821	finn-b-N14_URINOTH
rs615997	T	C	-0.0029	0.0104	0.778501	Other diseases of urinary system || id:finn-b-N14_URINOTH	0.5102	finn-b-N14_URINOTH
rs186073	T	C	0.0062	0.0107	0.561	Other diseases of urinary system || id:finn-b-N14_URINOTH	0.3944	finn-b-N14_URINOTH
rs6445926	G	C	-0.0206	0.0106	0.0517702	Other diseases of urinary system || id:finn-b-N14_URINOTH	0.4085	finn-b-N14_URINOTH
rs28584818	A	G	-0.0153	0.0194	0.4295	Other diseases of urinary system || id:finn-b-N14_URINOTH	0.07998	finn-b-N14_URINOTH
rs10938938	A	G	-0.0114	0.0143	0.4275	Other diseases of urinary system || id:finn-b-N14_URINOTH	0.8428	finn-b-N14_URINOTH
rs2175069	G	A	-0.0191	0.0108	0.0766496	Other diseases of urinary system || id:finn-b-N14_URINOTH	0.6271	finn-b-N14_URINOTH
rs73218807	G	A	0.0116	0.0191	0.543501	Other diseases of urinary system || id:finn-b-N14_URINOTH	0.08143	finn-b-N14_URINOTH
rs55672356	T	A	-0.0081	0.0299	0.7873	Other diseases of urinary system || id:finn-b-N14_URINOTH	0.03167	finn-b-N14_URINOTH
rs7441445	T	C	-0.0089	0.0105	0.396	Other diseases of urinary system || id:finn-b-N14_URINOTH	0.4871	finn-b-N14_URINOTH
rs71315246	A	G	-0.0146	0.0152	0.3377	Other diseases of urinary system || id:finn-b-N14_URINOTH	0.1355	finn-b-N14_URINOTH
rs1442060	A	G	-0.0071	0.0106	0.504001	Other diseases of urinary system || id:finn-b-N14_URINOTH	0.4582	finn-b-N14_URINOTH
rs12513188	G	A	-0.008	0.0118	0.4959	Other diseases of urinary system || id:finn-b-N14_URINOTH	0.2696	finn-b-N14_URINOTH
rs58767323	G	C	0.0086	0.0137	0.5329	Other diseases of urinary system || id:finn-b-N14_URINOTH	0.1771	finn-b-N14_URINOTH
rs6846512	C	T	0.012	0.0163	0.4632	Other diseases of urinary system || id:finn-b-N14_URINOTH	0.8847	finn-b-N14_URINOTH
rs12986628	T	C	-0.0117	0.0132	0.3739	Other diseases of urinary system || id:finn-b-N14_URINOTH	0.8072	finn-b-N14_URINOTH
rs138460696	A	G	-0.014	0.0199	0.48	Other diseases of urinary system || id:finn-b-N14_URINOTH	0.07696	finn-b-N14_URINOTH
rs62187631	T	C	0.0021	0.0133	0.8748	Other diseases of urinary system || id:finn-b-N14_URINOTH	0.1918	finn-b-N14_URINOTH
rs1528479	A	G	0.0032	0.0108	0.770201	Other diseases of urinary system || id:finn-b-N14_URINOTH	0.6247	finn-b-N14_URINOTH
rs16866406	A	G	0.007	0.0144	0.6271	Other diseases of urinary system || id:finn-b-N14_URINOTH	0.1526	finn-b-N14_URINOTH
rs3771393	T	C	0.0021	0.0132	0.8709	Other diseases of urinary system || id:finn-b-N14_URINOTH	0.806	finn-b-N14_URINOTH
rs6759615	A	G	-0.039	0.0176	0.0265003	Other diseases of urinary system || id:finn-b-N14_URINOTH	0.09767	finn-b-N14_URINOTH
rs13020688	G	A	-0.0214	0.0114	0.0604895	Other diseases of urinary system || id:finn-b-N14_URINOTH	0.3052	finn-b-N14_URINOTH
rs10497836	T	C	-0.0002	0.0128	0.9904	Other diseases of urinary system || id:finn-b-N14_URINOTH	0.7882	finn-b-N14_URINOTH
rs3791893	A	G	-0.0108	0.015	0.4737	Other diseases of urinary system || id:finn-b-N14_URINOTH	0.1434	finn-b-N14_URINOTH
rs16843660	A	G	-0.0013	0.03	0.9656	Other diseases of urinary system || id:finn-b-N14_URINOTH	0.03173	finn-b-N14_URINOTH
rs13409132	A	G	-0.0112	0.0283	0.6912	Other diseases of urinary system || id:finn-b-N14_URINOTH	0.03554	finn-b-N14_URINOTH
rs3013089	G	A	-0.0103	0.0108	0.3411	Other diseases of urinary system || id:finn-b-N14_URINOTH	0.3734	finn-b-N14_URINOTH
rs10798999	C	T	0.0104	0.0118	0.3766	Other diseases of urinary system || id:finn-b-N14_URINOTH	0.2683	finn-b-N14_URINOTH
rs954878	A	G	0.0054	0.0108	0.6195	Other diseases of urinary system || id:finn-b-N14_URINOTH	0.3717	finn-b-N14_URINOTH
rs143438747	T	C	0.0199	0.0198	0.3144	Other diseases of urinary system || id:finn-b-N14_URINOTH	0.07574	finn-b-N14_URINOTH
rs13376554	A	T	0.0276	0.0334	0.4075	Other diseases of urinary system || id:finn-b-N14_URINOTH	0.02542	finn-b-N14_URINOTH
rs3000856	A	T	0.0216	0.0142	0.1283	Other diseases of urinary system || id:finn-b-N14_URINOTH	0.8372	finn-b-N14_URINOTH
rs74060145	C	G	0.0222	0.0194	0.2532	Other diseases of urinary system || id:finn-b-N14_URINOTH	0.07871	finn-b-N14_URINOTH
rs1884466	C	T	-0.0008	0.0105	0.938	Other diseases of urinary system || id:finn-b-N14_URINOTH	0.5197	finn-b-N14_URINOTH
rs11586026	A	T	-0.0152	0.0292	0.6026	Other diseases of urinary system || id:finn-b-N14_URINOTH	0.033	finn-b-N14_URINOTH
rs72706335	T	C	-0.0389	0.0331	0.2403	Other diseases of urinary system || id:finn-b-N14_URINOTH	0.0255	finn-b-N14_URINOTH
rs482905	G	T	-0.0189	0.0121	0.1176	Other diseases of urinary system || id:finn-b-N14_URINOTH	0.2482	finn-b-N14_URINOTH
rs61806997	T	C	-0.0075	0.0143	0.598	Other diseases of urinary system || id:finn-b-N14_URINOTH	0.1584	finn-b-N14_URINOTH
rs2495052	A	G	-0.0078	0.0147	0.5978	Other diseases of urinary system || id:finn-b-N14_URINOTH	0.148	finn-b-N14_URINOTH
rs2798105	A	G	0.0331	0.0175	0.0577896	Other diseases of urinary system || id:finn-b-N14_URINOTH	0.09933	finn-b-N14_URINOTH
rs11207728	A	G	-0.0086	0.0141	0.5407	Other diseases of urinary system || id:finn-b-N14_URINOTH	0.837	finn-b-N14_URINOTH
rs75325512	G	C	0.0163	0.0224	0.4657	Other diseases of urinary system || id:finn-b-N14_URINOTH	0.05896	finn-b-N14_URINOTH
rs9725395	A	G	-0.0117	0.0164	0.4768	Other diseases of urinary system || id:finn-b-N14_URINOTH	0.1148	finn-b-N14_URINOTH
rs751183	C	T	-0.002	0.0135	0.8799	Other diseases of urinary system || id:finn-b-N14_URINOTH	0.8193	finn-b-N14_URINOTH
rs12740451	T	C	0.0115	0.0153	0.453401	Other diseases of urinary system || id:finn-b-N14_URINOTH	0.1349	finn-b-N14_URINOTH
rs3009418	A	C	0.0309	0.0249	0.2151	Other diseases of urinary system || id:finn-b-N14_URINOTH	0.9528	finn-b-N14_URINOTH
rs1928341	G	A	-0.0035	0.0106	0.744699	Other diseases of urinary system || id:finn-b-N14_URINOTH	0.5952	finn-b-N14_URINOTH
rs16891896	G	A	0.0085	0.0187	0.647301	Other diseases of urinary system || id:finn-b-N14_URINOTH	0.08475	finn-b-N14_URINOTH
rs13154778	T	A	-0.0299	0.012	0.0129101	Other diseases of urinary system || id:finn-b-N14_URINOTH	0.2509	finn-b-N14_URINOTH
rs2642760	G	C	0.0053	0.0113	0.6376	Other diseases of urinary system || id:finn-b-N14_URINOTH	0.3076	finn-b-N14_URINOTH
rs6890185	C	T	0.023	0.0112	0.0394303	Other diseases of urinary system || id:finn-b-N14_URINOTH	0.6751	finn-b-N14_URINOTH
rs2943022	T	C	-0.0192	0.0106	0.0696194	Other diseases of urinary system || id:finn-b-N14_URINOTH	0.5835	finn-b-N14_URINOTH
rs1397793	A	G	0.0198	0.0115	0.0847891	Other diseases of urinary system || id:finn-b-N14_URINOTH	0.6903	finn-b-N14_URINOTH
rs2546105	T	A	-0.0008	0.0121	0.9472	Other diseases of urinary system || id:finn-b-N14_URINOTH	0.7528	finn-b-N14_URINOTH
rs10060821	T	C	0.0144	0.0122	0.2378	Other diseases of urinary system || id:finn-b-N14_URINOTH	0.2421	finn-b-N14_URINOTH
rs115807074	A	G	0.0476	0.0504	0.3452	Other diseases of urinary system || id:finn-b-N14_URINOTH	0.01104	finn-b-N14_URINOTH
rs80078995	A	T	0.0048	0.0148	0.747001	Other diseases of urinary system || id:finn-b-N14_URINOTH	0.1449	finn-b-N14_URINOTH
rs6831034	T	A	-0.0187	0.0183	0.3079	Other diseases of urinary system || id:finn-b-N14_URINOTH	0.08918	finn-b-N14_URINOTH
rs267959	G	A	0.0156	0.0116	0.1806	Other diseases of urinary system || id:finn-b-N14_URINOTH	0.7225	finn-b-N14_URINOTH
rs7700479	T	A	0.0172	0.0171	0.3149	Other diseases of urinary system || id:finn-b-N14_URINOTH	0.105	finn-b-N14_URINOTH
rs11750293	G	T	-0.0104	0.0109	0.3363	Other diseases of urinary system || id:finn-b-N14_URINOTH	0.3702	finn-b-N14_URINOTH
rs2278540	G	A	0.0086	0.0109	0.43	Other diseases of urinary system || id:finn-b-N14_URINOTH	0.3635	finn-b-N14_URINOTH
rs1031599	T	G	-0.0079	0.0215	0.7147	Other diseases of urinary system || id:finn-b-N14_URINOTH	0.9359	finn-b-N14_URINOTH
rs6797343	T	G	0.0011	0.0132	0.9313	Other diseases of urinary system || id:finn-b-N14_URINOTH	0.8089	finn-b-N14_URINOTH
rs13082419	C	T	0.0116	0.0167	0.4879	Other diseases of urinary system || id:finn-b-N14_URINOTH	0.11	finn-b-N14_URINOTH
rs12634070	T	C	0.0015	0.012	0.9001	Other diseases of urinary system || id:finn-b-N14_URINOTH	0.2568	finn-b-N14_URINOTH
rs3932485	C	T	-0.0132	0.0107	0.2172	Other diseases of urinary system || id:finn-b-N14_URINOTH	0.3908	finn-b-N14_URINOTH
rs4428215	G	A	-0.0001	0.012	0.9908	Other diseases of urinary system || id:finn-b-N14_URINOTH	0.2535	finn-b-N14_URINOTH
rs12649930	T	G	-0.02	0.0174	0.2522	Other diseases of urinary system || id:finn-b-N14_URINOTH	0.1	finn-b-N14_URINOTH
rs2276875	A	G	-0.0198	0.012	0.0999793	Other diseases of urinary system || id:finn-b-N14_URINOTH	0.2604	finn-b-N14_URINOTH
rs4459992	T	C	-0.0031	0.0111	0.7796	Other diseases of urinary system || id:finn-b-N14_URINOTH	0.3274	finn-b-N14_URINOTH
rs2017189	T	G	0.0137	0.0104	0.1887	Other diseases of urinary system || id:finn-b-N14_URINOTH	0.5284	finn-b-N14_URINOTH
rs13069367	A	C	0.0001	0.0106	0.9948	Other diseases of urinary system || id:finn-b-N14_URINOTH	0.4075	finn-b-N14_URINOTH
rs4848741	G	A	0.0056	0.0122	0.6461	Other diseases of urinary system || id:finn-b-N14_URINOTH	0.7613	finn-b-N14_URINOTH
rs68093214	C	T	-0.0158	0.0122	0.195	Other diseases of urinary system || id:finn-b-N14_URINOTH	0.2412	finn-b-N14_URINOTH
rs11706043	T	A	0.0253	0.0127	0.0457404	Other diseases of urinary system || id:finn-b-N14_URINOTH	0.2193	finn-b-N14_URINOTH
rs57199565	T	C	0.0055	0.0137	0.6863	Other diseases of urinary system || id:finn-b-N14_URINOTH	0.1996	finn-b-N14_URINOTH
rs6445851	A	G	0.0091	0.0108	0.3995	Other diseases of urinary system || id:finn-b-N14_URINOTH	0.6272	finn-b-N14_URINOTH
rs140997932	T	C	-0.0321	0.0229	0.1614	Other diseases of urinary system || id:finn-b-N14_URINOTH	0.05515	finn-b-N14_URINOTH
rs57665991	C	G	-0.0178	0.0121	0.1416	Other diseases of urinary system || id:finn-b-N14_URINOTH	0.2474	finn-b-N14_URINOTH
rs148376875	T	G	-0.0229	0.0146	0.1162	Other diseases of urinary system || id:finn-b-N14_URINOTH	0.1528	finn-b-N14_URINOTH
rs6793291	A	C	0.0303	0.0236	0.1995	Other diseases of urinary system || id:finn-b-N14_URINOTH	0.9471	finn-b-N14_URINOTH
rs11809762	G	A	0.0043	0.0132	0.745101	Other diseases of urinary system || id:finn-b-N14_URINOTH	0.1918	finn-b-N14_URINOTH
rs115043014	G	A	0.044	0.0403	0.2742	Other diseases of urinary system || id:finn-b-N14_URINOTH	0.01736	finn-b-N14_URINOTH
rs3842897	G	A	0.0044	0.0184	0.8094	Other diseases of urinary system || id:finn-b-N14_URINOTH	0.08923	finn-b-N14_URINOTH
rs12069354	C	T	-0.0354	0.0216	0.1012	Other diseases of urinary system || id:finn-b-N14_URINOTH	0.06252	finn-b-N14_URINOTH
rs7555878	G	A	-0.023	0.0121	0.0577404	Other diseases of urinary system || id:finn-b-N14_URINOTH	0.753	finn-b-N14_URINOTH
rs4079028	C	T	-0.0089	0.0122	0.4662	Other diseases of urinary system || id:finn-b-N14_URINOTH	0.2395	finn-b-N14_URINOTH
rs3010848	G	A	0.0174	0.0109	0.1108	Other diseases of urinary system || id:finn-b-N14_URINOTH	0.3596	finn-b-N14_URINOTH
rs4644504	T	C	0.0308	0.0208	0.1391	Other diseases of urinary system || id:finn-b-N14_URINOTH	0.06747	finn-b-N14_URINOTH
rs9426434	T	C	-0.0159	0.011	0.1494	Other diseases of urinary system || id:finn-b-N14_URINOTH	0.3507	finn-b-N14_URINOTH
rs1010560	C	A	0.0035	0.0118	0.769699	Other diseases of urinary system || id:finn-b-N14_URINOTH	0.2683	finn-b-N14_URINOTH
rs78848836	A	G	-0.0002	0.0171	0.992	Other diseases of urinary system || id:finn-b-N14_URINOTH	0.1038	finn-b-N14_URINOTH
rs6656451	T	C	-0.0002	0.0104	0.9834	Other diseases of urinary system || id:finn-b-N14_URINOTH	0.5303	finn-b-N14_URINOTH
rs11166257	G	T	-0.0277	0.0132	0.0362502	Other diseases of urinary system || id:finn-b-N14_URINOTH	0.8087	finn-b-N14_URINOTH
rs62167033	T	C	-0.0059	0.0263	0.8232	Other diseases of urinary system || id:finn-b-N14_URINOTH	0.04102	finn-b-N14_URINOTH
rs1376754	G	A	0.0104	0.0105	0.3227	Other diseases of urinary system || id:finn-b-N14_URINOTH	0.494	finn-b-N14_URINOTH
rs10754972	G	A	0.0024	0.0113	0.8277	Other diseases of urinary system || id:finn-b-N14_URINOTH	0.6889	finn-b-N14_URINOTH
rs4600608	G	A	0.0106	0.0129	0.4084	Other diseases of urinary system || id:finn-b-N14_URINOTH	0.7892	finn-b-N14_URINOTH
rs12747809	A	G	0.003	0.0116	0.796	Other diseases of urinary system || id:finn-b-N14_URINOTH	0.7182	finn-b-N14_URINOTH
rs6707783	C	T	-0.0221	0.0182	0.2241	Other diseases of urinary system || id:finn-b-N14_URINOTH	0.09119	finn-b-N14_URINOTH
rs17043785	T	C	0.0405	0.0184	0.0276001	Other diseases of urinary system || id:finn-b-N14_URINOTH	0.08801	finn-b-N14_URINOTH
rs2374342	C	A	0.0099	0.0106	0.351	Other diseases of urinary system || id:finn-b-N14_URINOTH	0.4147	finn-b-N14_URINOTH
rs72894957	G	A	0.0019	0.035	0.9559	Other diseases of urinary system || id:finn-b-N14_URINOTH	0.02268	finn-b-N14_URINOTH
rs995642	C	T	0.005	0.0122	0.6811	Other diseases of urinary system || id:finn-b-N14_URINOTH	0.239	finn-b-N14_URINOTH
rs1530559	G	A	-0.0088	0.0106	0.4062	Other diseases of urinary system || id:finn-b-N14_URINOTH	0.463	finn-b-N14_URINOTH
rs182549	T	C	0.0084	0.0107	0.4337	Other diseases of urinary system || id:finn-b-N14_URINOTH	0.5974	finn-b-N14_URINOTH
rs1948423	T	A	0.0184	0.011	0.0940806	Other diseases of urinary system || id:finn-b-N14_URINOTH	0.3481	finn-b-N14_URINOTH
rs7645873	T	A	0.0091	0.0124	0.4655	Other diseases of urinary system || id:finn-b-N14_URINOTH	0.7686	finn-b-N14_URINOTH
rs6762473	A	C	-0.0068	0.011	0.536	Other diseases of urinary system || id:finn-b-N14_URINOTH	0.6599	finn-b-N14_URINOTH
rs6806351	T	C	-0.0061	0.0126	0.627001	Other diseases of urinary system || id:finn-b-N14_URINOTH	0.2193	finn-b-N14_URINOTH
rs12186080	G	A	0.0121	0.014	0.3902	Other diseases of urinary system || id:finn-b-N14_URINOTH	0.1648	finn-b-N14_URINOTH
rs4678258	T	C	-0.0111	0.0122	0.364	Other diseases of urinary system || id:finn-b-N14_URINOTH	0.2422	finn-b-N14_URINOTH
rs3792064	G	A	-0.0196	0.0233	0.4013	Other diseases of urinary system || id:finn-b-N14_URINOTH	0.05265	finn-b-N14_URINOTH
rs78702810	T	C	-0.0125	0.0172	0.4688	Other diseases of urinary system || id:finn-b-N14_URINOTH	0.1052	finn-b-N14_URINOTH
rs11715853	G	A	-0.0005	0.0114	0.9671	Other diseases of urinary system || id:finn-b-N14_URINOTH	0.2953	finn-b-N14_URINOTH
rs78720113	A	G	0.0097	0.0195	0.617999	Other diseases of urinary system || id:finn-b-N14_URINOTH	0.0786	finn-b-N14_URINOTH
rs76463770	A	G	-0.0031	0.0306	0.9187	Other diseases of urinary system || id:finn-b-N14_URINOTH	0.02991	finn-b-N14_URINOTH
rs2399304	T	C	-0.0074	0.0162	0.6498	Other diseases of urinary system || id:finn-b-N14_URINOTH	0.8826	finn-b-N14_URINOTH
rs11720857	C	T	-0.0071	0.0137	0.6038	Other diseases of urinary system || id:finn-b-N14_URINOTH	0.175	finn-b-N14_URINOTH
rs73186226	G	A	0.0032	0.0202	0.875	Other diseases of urinary system || id:finn-b-N14_URINOTH	0.07543	finn-b-N14_URINOTH
rs7631304	G	A	0.0184	0.0146	0.2073	Other diseases of urinary system || id:finn-b-N14_URINOTH	0.1486	finn-b-N14_URINOTH
rs4685827	T	C	0.007	0.0122	0.568	Other diseases of urinary system || id:finn-b-N14_URINOTH	0.2414	finn-b-N14_URINOTH
rs79795328	A	G	0.0109	0.015	0.4671	Other diseases of urinary system || id:finn-b-N14_URINOTH	0.1391	finn-b-N14_URINOTH
rs994794	G	C	-0.0172	0.03	0.5657	Other diseases of urinary system || id:finn-b-N14_URINOTH	0.03098	finn-b-N14_URINOTH
rs7697240	C	T	0.017	0.0219	0.4385	Other diseases of urinary system || id:finn-b-N14_URINOTH	0.9389	finn-b-N14_URINOTH
rs75586835	A	G	0.0064	0.0204	0.7558	Other diseases of urinary system || id:finn-b-N14_URINOTH	0.07067	finn-b-N14_URINOTH
rs6818880	G	A	-0.0052	0.0105	0.623499	Other diseases of urinary system || id:finn-b-N14_URINOTH	0.5334	finn-b-N14_URINOTH
rs2893871	G	A	-0.014	0.0167	0.4007	Other diseases of urinary system || id:finn-b-N14_URINOTH	0.11	finn-b-N14_URINOTH
rs1649999	A	G	0.0171	0.0178	0.3371	Other diseases of urinary system || id:finn-b-N14_URINOTH	0.09689	finn-b-N14_URINOTH
rs12257723	A	C	0.0079	0.0111	0.4768	Other diseases of urinary system || id:finn-b-N14_URINOTH	0.3266	finn-b-N14_URINOTH
rs1334944	T	C	-0.0051	0.0116	0.658701	Other diseases of urinary system || id:finn-b-N14_URINOTH	0.2782	finn-b-N14_URINOTH
rs11192447	A	G	0	0.0241	0.9987	Other diseases of urinary system || id:finn-b-N14_URINOTH	0.05044	finn-b-N14_URINOTH
rs16937247	G	C	0.0553	0.0131	2.33297e-05	Other diseases of urinary system || id:finn-b-N14_URINOTH	0.2005	finn-b-N14_URINOTH
rs12288512	A	G	-0.0148	0.0122	0.2281	Other diseases of urinary system || id:finn-b-N14_URINOTH	0.2394	finn-b-N14_URINOTH
rs78521377	C	T	0.0133	0.0303	0.66	Other diseases of urinary system || id:finn-b-N14_URINOTH	0.03026	finn-b-N14_URINOTH
rs55921101	A	T	0.0082	0.0123	0.5052	Other diseases of urinary system || id:finn-b-N14_URINOTH	0.236	finn-b-N14_URINOTH
rs7915461	C	T	0.0204	0.0207	0.3227	Other diseases of urinary system || id:finn-b-N14_URINOTH	0.9312	finn-b-N14_URINOTH
rs116969552	A	G	-0.0948	0.0313	0.00248897	Other diseases of urinary system || id:finn-b-N14_URINOTH	0.02878	finn-b-N14_URINOTH
rs2918132	T	C	-0.0113	0.0108	0.2954	Other diseases of urinary system || id:finn-b-N14_URINOTH	0.6279	finn-b-N14_URINOTH
rs1046175	G	C	-0.0047	0.0206	0.8198	Other diseases of urinary system || id:finn-b-N14_URINOTH	0.9301	finn-b-N14_URINOTH
rs111229068	A	T	-0.015	0.0193	0.4388	Other diseases of urinary system || id:finn-b-N14_URINOTH	0.07913	finn-b-N14_URINOTH
rs55807413	A	G	0.0353	0.0174	0.0423097	Other diseases of urinary system || id:finn-b-N14_URINOTH	0.1007	finn-b-N14_URINOTH
rs56349194	A	G	0.018	0.0156	0.2484	Other diseases of urinary system || id:finn-b-N14_URINOTH	0.1287	finn-b-N14_URINOTH
rs7129639	A	C	0.0026	0.0111	0.8156	Other diseases of urinary system || id:finn-b-N14_URINOTH	0.6677	finn-b-N14_URINOTH
rs1867876	T	C	-0.0036	0.0114	0.749799	Other diseases of urinary system || id:finn-b-N14_URINOTH	0.2977	finn-b-N14_URINOTH
rs11027642	C	T	0.0075	0.0149	0.6142	Other diseases of urinary system || id:finn-b-N14_URINOTH	0.143	finn-b-N14_URINOTH
rs11006576	A	G	-0.0172	0.0105	0.102	Other diseases of urinary system || id:finn-b-N14_URINOTH	0.5405	finn-b-N14_URINOTH
rs7073658	G	T	-0.0176	0.0105	0.0929994	Other diseases of urinary system || id:finn-b-N14_URINOTH	0.5139	finn-b-N14_URINOTH
rs7083431	A	C	-0.0003	0.0117	0.9784	Other diseases of urinary system || id:finn-b-N14_URINOTH	0.2744	finn-b-N14_URINOTH
rs75820970	C	G	-0.0231	0.0159	0.1445	Other diseases of urinary system || id:finn-b-N14_URINOTH	0.1252	finn-b-N14_URINOTH
rs11818408	G	A	0.008	0.0107	0.457999	Other diseases of urinary system || id:finn-b-N14_URINOTH	0.396	finn-b-N14_URINOTH
rs79086868	T	C	-0.042	0.0174	0.0156899	Other diseases of urinary system || id:finn-b-N14_URINOTH	0.1009	finn-b-N14_URINOTH
rs739451	C	T	-0.0014	0.0129	0.9117	Other diseases of urinary system || id:finn-b-N14_URINOTH	0.208	finn-b-N14_URINOTH
rs11250875	T	C	0.0261	0.0127	0.0398401	Other diseases of urinary system || id:finn-b-N14_URINOTH	0.2138	finn-b-N14_URINOTH
rs4278423	T	C	0.0306	0.0217	0.1584	Other diseases of urinary system || id:finn-b-N14_URINOTH	0.06205	finn-b-N14_URINOTH
rs77540684	T	G	-0.0042	0.0177	0.8114	Other diseases of urinary system || id:finn-b-N14_URINOTH	0.09599	finn-b-N14_URINOTH
rs7001029	C	T	-0.0192	0.0182	0.2903	Other diseases of urinary system || id:finn-b-N14_URINOTH	0.09256	finn-b-N14_URINOTH
rs2166943	C	A	0.0091	0.0106	0.3913	Other diseases of urinary system || id:finn-b-N14_URINOTH	0.5807	finn-b-N14_URINOTH
rs1689282	A	C	-0.0018	0.0112	0.8711	Other diseases of urinary system || id:finn-b-N14_URINOTH	0.3227	finn-b-N14_URINOTH
rs573933	T	C	-0.0304	0.017	0.0733703	Other diseases of urinary system || id:finn-b-N14_URINOTH	0.1065	finn-b-N14_URINOTH
rs806808	C	T	-0.0034	0.0105	0.744501	Other diseases of urinary system || id:finn-b-N14_URINOTH	0.5592	finn-b-N14_URINOTH
rs11597105	A	G	-0.0006	0.0131	0.9637	Other diseases of urinary system || id:finn-b-N14_URINOTH	0.1973	finn-b-N14_URINOTH
rs72776675	T	C	0.0015	0.0139	0.9156	Other diseases of urinary system || id:finn-b-N14_URINOTH	0.1718	finn-b-N14_URINOTH
rs4750583	G	A	0.0117	0.0134	0.3847	Other diseases of urinary system || id:finn-b-N14_URINOTH	0.8113	finn-b-N14_URINOTH
rs946513	T	C	-0.0259	0.0254	0.308	Other diseases of urinary system || id:finn-b-N14_URINOTH	0.954	finn-b-N14_URINOTH
rs4747450	C	A	0.0043	0.0125	0.7294	Other diseases of urinary system || id:finn-b-N14_URINOTH	0.2248	finn-b-N14_URINOTH
rs10827477	A	G	0.0069	0.0109	0.5256	Other diseases of urinary system || id:finn-b-N14_URINOTH	0.3522	finn-b-N14_URINOTH
rs2795528	G	A	0.0203	0.0228	0.3736	Other diseases of urinary system || id:finn-b-N14_URINOTH	0.05584	finn-b-N14_URINOTH
rs112102233	A	G	0.0192	0.0248	0.4388	Other diseases of urinary system || id:finn-b-N14_URINOTH	0.04663	finn-b-N14_URINOTH
rs921383	G	A	0.0002	0.0107	0.9859	Other diseases of urinary system || id:finn-b-N14_URINOTH	0.6166	finn-b-N14_URINOTH
rs4073731	T	C	-0.0031	0.0141	0.8277	Other diseases of urinary system || id:finn-b-N14_URINOTH	0.1626	finn-b-N14_URINOTH
rs7303158	C	T	-0.0098	0.0105	0.3522	Other diseases of urinary system || id:finn-b-N14_URINOTH	0.4494	finn-b-N14_URINOTH
rs10841473	G	C	-0.0137	0.0124	0.2692	Other diseases of urinary system || id:finn-b-N14_URINOTH	0.2315	finn-b-N14_URINOTH
rs10842464	C	T	0.0017	0.0114	0.8809	Other diseases of urinary system || id:finn-b-N14_URINOTH	0.6987	finn-b-N14_URINOTH
rs2025938	G	A	-0.0259	0.0212	0.2207	Other diseases of urinary system || id:finn-b-N14_URINOTH	0.06597	finn-b-N14_URINOTH
rs7098347	G	A	0.0115	0.0105	0.2753	Other diseases of urinary system || id:finn-b-N14_URINOTH	0.4343	finn-b-N14_URINOTH
rs1391597	C	T	0.0096	0.0107	0.3691	Other diseases of urinary system || id:finn-b-N14_URINOTH	0.3942	finn-b-N14_URINOTH
rs77779484	G	A	-0.0291	0.0219	0.183	Other diseases of urinary system || id:finn-b-N14_URINOTH	0.06088	finn-b-N14_URINOTH
rs73031725	T	C	0.0061	0.03	0.8383	Other diseases of urinary system || id:finn-b-N14_URINOTH	0.03135	finn-b-N14_URINOTH
rs6920448	C	T	-0.0257	0.018	0.1537	Other diseases of urinary system || id:finn-b-N14_URINOTH	0.09337	finn-b-N14_URINOTH
rs9328464	T	C	-0.0011	0.0105	0.9187	Other diseases of urinary system || id:finn-b-N14_URINOTH	0.4467	finn-b-N14_URINOTH
rs62395635	T	C	0.0139	0.0217	0.5232	Other diseases of urinary system || id:finn-b-N14_URINOTH	0.06229	finn-b-N14_URINOTH
rs73729431	C	T	-0.0596	0.0368	0.1051	Other diseases of urinary system || id:finn-b-N14_URINOTH	0.02086	finn-b-N14_URINOTH
rs3860755	G	C	0.015	0.0112	0.1805	Other diseases of urinary system || id:finn-b-N14_URINOTH	0.3242	finn-b-N14_URINOTH
rs2221441	G	C	0.0186	0.0105	0.0767202	Other diseases of urinary system || id:finn-b-N14_URINOTH	0.4987	finn-b-N14_URINOTH
rs77558518	A	G	0.0081	0.0178	0.6506	Other diseases of urinary system || id:finn-b-N14_URINOTH	0.09573	finn-b-N14_URINOTH
rs2081023	A	G	0.0089	0.0149	0.5521	Other diseases of urinary system || id:finn-b-N14_URINOTH	0.1428	finn-b-N14_URINOTH
rs72866977	A	C	0.0147	0.0195	0.450199	Other diseases of urinary system || id:finn-b-N14_URINOTH	0.07917	finn-b-N14_URINOTH
rs56210598	C	G	0.0048	0.0114	0.6758	Other diseases of urinary system || id:finn-b-N14_URINOTH	0.3156	finn-b-N14_URINOTH
rs9348442	C	T	-0.0139	0.0157	0.3761	Other diseases of urinary system || id:finn-b-N14_URINOTH	0.1262	finn-b-N14_URINOTH
rs440215	T	C	-0.0033	0.0105	0.750699	Other diseases of urinary system || id:finn-b-N14_URINOTH	0.5603	finn-b-N14_URINOTH
rs58212166	A	G	0.0067	0.0135	0.6191	Other diseases of urinary system || id:finn-b-N14_URINOTH	0.1842	finn-b-N14_URINOTH
rs262812	T	C	0.0061	0.0114	0.5939	Other diseases of urinary system || id:finn-b-N14_URINOTH	0.3049	finn-b-N14_URINOTH
rs550843	T	C	0.0111	0.0117	0.3415	Other diseases of urinary system || id:finn-b-N14_URINOTH	0.2823	finn-b-N14_URINOTH
rs213863	T	C	-0.0111	0.0109	0.3048	Other diseases of urinary system || id:finn-b-N14_URINOTH	0.6398	finn-b-N14_URINOTH
rs1232220	T	G	0.0242	0.0176	0.1693	Other diseases of urinary system || id:finn-b-N14_URINOTH	0.8988	finn-b-N14_URINOTH
rs4532474	G	A	-0.0103	0.0141	0.4666	Other diseases of urinary system || id:finn-b-N14_URINOTH	0.1633	finn-b-N14_URINOTH
rs11153159	G	C	-0.0103	0.015	0.490801	Other diseases of urinary system || id:finn-b-N14_URINOTH	0.142	finn-b-N14_URINOTH
rs11965579	G	C	-0.0299	0.0352	0.395	Other diseases of urinary system || id:finn-b-N14_URINOTH	0.02212	finn-b-N14_URINOTH
rs2090816	C	A	-0.0033	0.0136	0.8088	Other diseases of urinary system || id:finn-b-N14_URINOTH	0.8163	finn-b-N14_URINOTH
rs61264131	A	C	-0.0263	0.0177	0.1364	Other diseases of urinary system || id:finn-b-N14_URINOTH	0.09687	finn-b-N14_URINOTH
rs4452603	T	G	0.0082	0.0118	0.4878	Other diseases of urinary system || id:finn-b-N14_URINOTH	0.2724	finn-b-N14_URINOTH
rs13219468	G	C	-0.0088	0.0116	0.4493	Other diseases of urinary system || id:finn-b-N14_URINOTH	0.2864	finn-b-N14_URINOTH
rs78191726	T	C	-0.0141	0.0201	0.4817	Other diseases of urinary system || id:finn-b-N14_URINOTH	0.0729	finn-b-N14_URINOTH
rs3005511	G	A	-0.006	0.0114	0.600999	Other diseases of urinary system || id:finn-b-N14_URINOTH	0.701	finn-b-N14_URINOTH
rs10950694	C	T	-0.006	0.0109	0.5827	Other diseases of urinary system || id:finn-b-N14_URINOTH	0.6413	finn-b-N14_URINOTH
rs73074665	A	T	0.0133	0.0213	0.5317	Other diseases of urinary system || id:finn-b-N14_URINOTH	0.06406	finn-b-N14_URINOTH
rs62583469	T	A	0.0097	0.0152	0.5224	Other diseases of urinary system || id:finn-b-N14_URINOTH	0.1372	finn-b-N14_URINOTH
rs1272208	T	G	0.0048	0.0123	0.6939	Other diseases of urinary system || id:finn-b-N14_URINOTH	0.7615	finn-b-N14_URINOTH
rs2889192	T	G	0.0065	0.0147	0.659699	Other diseases of urinary system || id:finn-b-N14_URINOTH	0.851	finn-b-N14_URINOTH
rs10781340	A	G	0.0115	0.0159	0.468	Other diseases of urinary system || id:finn-b-N14_URINOTH	0.8743	finn-b-N14_URINOTH
rs35778461	C	T	0.0032	0.0124	0.7961	Other diseases of urinary system || id:finn-b-N14_URINOTH	0.2278	finn-b-N14_URINOTH
rs7853673	A	G	-0.0059	0.0105	0.5718	Other diseases of urinary system || id:finn-b-N14_URINOTH	0.5376	finn-b-N14_URINOTH
rs4452755	A	C	0.0007	0.011	0.9512	Other diseases of urinary system || id:finn-b-N14_URINOTH	0.3381	finn-b-N14_URINOTH
rs11140959	A	G	-0.0135	0.0153	0.3795	Other diseases of urinary system || id:finn-b-N14_URINOTH	0.1349	finn-b-N14_URINOTH
rs2853179	T	C	-0.0245	0.0125	0.0497898	Other diseases of urinary system || id:finn-b-N14_URINOTH	0.7708	finn-b-N14_URINOTH
rs12336782	T	C	0.0098	0.0196	0.6178	Other diseases of urinary system || id:finn-b-N14_URINOTH	0.07775	finn-b-N14_URINOTH
rs6972479	A	G	0.0056	0.013	0.667	Other diseases of urinary system || id:finn-b-N14_URINOTH	0.2053	finn-b-N14_URINOTH
rs62467127	C	T	-0.0056	0.0332	0.865	Other diseases of urinary system || id:finn-b-N14_URINOTH	0.02512	finn-b-N14_URINOTH
rs60254196	G	A	-0.0055	0.0105	0.5997	Other diseases of urinary system || id:finn-b-N14_URINOTH	0.5351	finn-b-N14_URINOTH
rs62504403	C	T	0.0012	0.0132	0.9283	Other diseases of urinary system || id:finn-b-N14_URINOTH	0.1953	finn-b-N14_URINOTH
rs62478832	T	A	-0.0128	0.011	0.244	Other diseases of urinary system || id:finn-b-N14_URINOTH	0.3411	finn-b-N14_URINOTH
rs2347697	G	T	0.0055	0.0113	0.6244	Other diseases of urinary system || id:finn-b-N14_URINOTH	0.3089	finn-b-N14_URINOTH
rs17809157	A	T	-0.0263	0.0166	0.1129	Other diseases of urinary system || id:finn-b-N14_URINOTH	0.1143	finn-b-N14_URINOTH
rs73128290	A	G	0.0015	0.0114	0.8986	Other diseases of urinary system || id:finn-b-N14_URINOTH	0.3002	finn-b-N14_URINOTH
rs113006825	T	C	-0.0156	0.0128	0.2218	Other diseases of urinary system || id:finn-b-N14_URINOTH	0.2168	finn-b-N14_URINOTH
rs10793103	T	C	-0.017	0.0105	0.1047	Other diseases of urinary system || id:finn-b-N14_URINOTH	0.5502	finn-b-N14_URINOTH
rs12794898	G	T	-0.0218	0.0157	0.1654	Other diseases of urinary system || id:finn-b-N14_URINOTH	0.129	finn-b-N14_URINOTH
rs1816223	G	A	0.002	0.013	0.8791	Other diseases of urinary system || id:finn-b-N14_URINOTH	0.7993	finn-b-N14_URINOTH
rs11607472	A	G	0.0224	0.0207	0.2806	Other diseases of urinary system || id:finn-b-N14_URINOTH	0.06772	finn-b-N14_URINOTH
rs3017103	G	A	-0.0054	0.0133	0.686901	Other diseases of urinary system || id:finn-b-N14_URINOTH	0.8081	finn-b-N14_URINOTH
rs594561	T	C	0.003	0.0104	0.7738	Other diseases of urinary system || id:finn-b-N14_URINOTH	0.4892	finn-b-N14_URINOTH
rs11018665	A	T	-0.0061	0.0122	0.6176	Other diseases of urinary system || id:finn-b-N14_URINOTH	0.2411	finn-b-N14_URINOTH
rs12226153	A	G	-0.0531	0.0444	0.2319	Other diseases of urinary system || id:finn-b-N14_URINOTH	0.01428	finn-b-N14_URINOTH
rs11054680	T	C	0.0005	0.0138	0.9729	Other diseases of urinary system || id:finn-b-N14_URINOTH	0.1723	finn-b-N14_URINOTH
rs1859797	G	A	-0.0028	0.0105	0.7913	Other diseases of urinary system || id:finn-b-N14_URINOTH	0.5496	finn-b-N14_URINOTH
rs114398731	G	C	0.0371	0.0232	0.1091	Other diseases of urinary system || id:finn-b-N14_URINOTH	0.05543	finn-b-N14_URINOTH
rs9350083	T	G	-0.0106	0.0109	0.3293	Other diseases of urinary system || id:finn-b-N14_URINOTH	0.3546	finn-b-N14_URINOTH
rs6881988	C	G	-0.0145	0.0105	0.1689	Other diseases of urinary system || id:finn-b-N14_URINOTH	0.5091	finn-b-N14_URINOTH
rs17291611	A	G	-0.0097	0.0149	0.5118	Other diseases of urinary system || id:finn-b-N14_URINOTH	0.1428	finn-b-N14_URINOTH
rs11591293	G	T	0.009	0.0106	0.3956	Other diseases of urinary system || id:finn-b-N14_URINOTH	0.4236	finn-b-N14_URINOTH
rs2491158	A	G	0.0238	0.0154	0.123	Other diseases of urinary system || id:finn-b-N14_URINOTH	0.8673	finn-b-N14_URINOTH
rs1515761	C	T	0.008	0.02	0.6891	Other diseases of urinary system || id:finn-b-N14_URINOTH	0.9255	finn-b-N14_URINOTH
rs75453768	G	T	-0.0013	0.0177	0.9396	Other diseases of urinary system || id:finn-b-N14_URINOTH	0.09804	finn-b-N14_URINOTH
rs2804244	G	A	0.0045	0.0107	0.675601	Other diseases of urinary system || id:finn-b-N14_URINOTH	0.6183	finn-b-N14_URINOTH
rs7898615	T	G	0.0157	0.0152	0.3032	Other diseases of urinary system || id:finn-b-N14_URINOTH	0.1369	finn-b-N14_URINOTH
rs11034576	A	G	0.0169	0.0158	0.286	Other diseases of urinary system || id:finn-b-N14_URINOTH	0.1237	finn-b-N14_URINOTH
rs320161	G	A	0.0082	0.0124	0.5087	Other diseases of urinary system || id:finn-b-N14_URINOTH	0.7699	finn-b-N14_URINOTH
rs55707116	C	A	-0.029	0.0199	0.1444	Other diseases of urinary system || id:finn-b-N14_URINOTH	0.07485	finn-b-N14_URINOTH
rs7033353	G	T	0.0004	0.0105	0.9696	Other diseases of urinary system || id:finn-b-N14_URINOTH	0.4772	finn-b-N14_URINOTH
rs62348779	T	C	-0.0103	0.0196	0.5992	Other diseases of urinary system || id:finn-b-N14_URINOTH	0.07765	finn-b-N14_URINOTH
rs431418	G	A	0.0087	0.0178	0.624001	Other diseases of urinary system || id:finn-b-N14_URINOTH	0.9056	finn-b-N14_URINOTH
rs34660375	A	G	0.0145	0.0148	0.3301	Other diseases of urinary system || id:finn-b-N14_URINOTH	0.1544	finn-b-N14_URINOTH
rs73176030	T	C	0.0141	0.0117	0.2292	Other diseases of urinary system || id:finn-b-N14_URINOTH	0.2722	finn-b-N14_URINOTH
rs7784490	G	C	0.0323	0.0111	0.00350897	Other diseases of urinary system || id:finn-b-N14_URINOTH	0.6679	finn-b-N14_URINOTH
rs113513883	A	G	-0.0042	0.0296	0.8865	Other diseases of urinary system || id:finn-b-N14_URINOTH	0.03339	finn-b-N14_URINOTH
rs62501473	G	A	-0.0086	0.0119	0.4703	Other diseases of urinary system || id:finn-b-N14_URINOTH	0.2637	finn-b-N14_URINOTH
rs11761679	T	C	-0.0157	0.0151	0.2965	Other diseases of urinary system || id:finn-b-N14_URINOTH	0.1397	finn-b-N14_URINOTH
rs17156849	G	A	-0.0292	0.0221	0.1861	Other diseases of urinary system || id:finn-b-N14_URINOTH	0.05935	finn-b-N14_URINOTH
rs13231526	C	A	0.02	0.0193	0.2983	Other diseases of urinary system || id:finn-b-N14_URINOTH	0.08006	finn-b-N14_URINOTH
rs553697	C	T	-0.0078	0.0135	0.561	Other diseases of urinary system || id:finn-b-N14_URINOTH	0.8127	finn-b-N14_URINOTH
rs9389714	C	T	0.0197	0.0184	0.2847	Other diseases of urinary system || id:finn-b-N14_URINOTH	0.08812	finn-b-N14_URINOTH
rs12216169	T	A	-0.0199	0.0164	0.2235	Other diseases of urinary system || id:finn-b-N14_URINOTH	0.1167	finn-b-N14_URINOTH
rs9490822	C	T	-0.0172	0.0105	0.1012	Other diseases of urinary system || id:finn-b-N14_URINOTH	0.4505	finn-b-N14_URINOTH
rs3734633	G	A	0.0104	0.0224	0.642	Other diseases of urinary system || id:finn-b-N14_URINOTH	0.05792	finn-b-N14_URINOTH
rs12191680	C	G	-0.0171	0.0173	0.3218	Other diseases of urinary system || id:finn-b-N14_URINOTH	0.1014	finn-b-N14_URINOTH
rs57340348	T	C	-0.0047	0.0131	0.7166	Other diseases of urinary system || id:finn-b-N14_URINOTH	0.2016	finn-b-N14_URINOTH
rs35011108	A	G	-0.0186	0.0209	0.3746	Other diseases of urinary system || id:finn-b-N14_URINOTH	0.06774	finn-b-N14_URINOTH
rs10279978	A	G	0.0187	0.0112	0.0963696	Other diseases of urinary system || id:finn-b-N14_URINOTH	0.3112	finn-b-N14_URINOTH
rs76904847	G	A	0.0009	0.0139	0.9464	Other diseases of urinary system || id:finn-b-N14_URINOTH	0.1763	finn-b-N14_URINOTH
rs9928243	C	A	-0.0025	0.0105	0.8084	Other diseases of urinary system || id:finn-b-N14_URINOTH	0.4711	finn-b-N14_URINOTH
rs7193937	C	G	-0.0078	0.011	0.4753	Other diseases of urinary system || id:finn-b-N14_URINOTH	0.617	finn-b-N14_URINOTH
rs74606150	C	G	-0.0183	0.0266	0.490999	Other diseases of urinary system || id:finn-b-N14_URINOTH	0.04099	finn-b-N14_URINOTH
rs72671304	T	C	-0.0053	0.02	0.789	Other diseases of urinary system || id:finn-b-N14_URINOTH	0.0741	finn-b-N14_URINOTH
rs2602429	T	C	0.0099	0.0119	0.4064	Other diseases of urinary system || id:finn-b-N14_URINOTH	0.7386	finn-b-N14_URINOTH
rs955844	A	C	-0.0018	0.0151	0.904	Other diseases of urinary system || id:finn-b-N14_URINOTH	0.1403	finn-b-N14_URINOTH
rs61060922	T	G	-0.0272	0.0291	0.349	Other diseases of urinary system || id:finn-b-N14_URINOTH	0.03338	finn-b-N14_URINOTH
rs2200429	A	G	-0.001	0.0176	0.9549	Other diseases of urinary system || id:finn-b-N14_URINOTH	0.09827	finn-b-N14_URINOTH
rs1223978	C	T	0.0077	0.0105	0.4623	Other diseases of urinary system || id:finn-b-N14_URINOTH	0.5307	finn-b-N14_URINOTH
rs11627628	T	C	-0.0206	0.0198	0.2989	Other diseases of urinary system || id:finn-b-N14_URINOTH	0.07646	finn-b-N14_URINOTH
rs9586501	G	A	-0.0244	0.0118	0.0391003	Other diseases of urinary system || id:finn-b-N14_URINOTH	0.2622	finn-b-N14_URINOTH
rs6496870	C	T	-0.0099	0.0109	0.3633	Other diseases of urinary system || id:finn-b-N14_URINOTH	0.6416	finn-b-N14_URINOTH
rs10048062	C	T	-0.0007	0.0186	0.9701	Other diseases of urinary system || id:finn-b-N14_URINOTH	0.0882	finn-b-N14_URINOTH
rs73044693	A	G	0	0.0207	0.999	Other diseases of urinary system || id:finn-b-N14_URINOTH	0.06981	finn-b-N14_URINOTH
rs4277593	G	A	0.0189	0.0106	0.0750499	Other diseases of urinary system || id:finn-b-N14_URINOTH	0.4102	finn-b-N14_URINOTH
rs685403	G	C	-0.0152	0.0154	0.3215	Other diseases of urinary system || id:finn-b-N14_URINOTH	0.1321	finn-b-N14_URINOTH
rs17830032	G	A	0.037	0.0192	0.0544302	Other diseases of urinary system || id:finn-b-N14_URINOTH	0.08144	finn-b-N14_URINOTH
rs1508033	A	C	0.0075	0.0114	0.5075	Other diseases of urinary system || id:finn-b-N14_URINOTH	0.3159	finn-b-N14_URINOTH
rs6493760	T	C	-0.0097	0.0109	0.3778	Other diseases of urinary system || id:finn-b-N14_URINOTH	0.6429	finn-b-N14_URINOTH
rs12440440	A	G	-0.0037	0.011	0.7348	Other diseases of urinary system || id:finn-b-N14_URINOTH	0.3419	finn-b-N14_URINOTH
rs72700702	T	C	0.008	0.0166	0.6304	Other diseases of urinary system || id:finn-b-N14_URINOTH	0.1105	finn-b-N14_URINOTH
rs73457410	A	G	0.0138	0.0214	0.519501	Other diseases of urinary system || id:finn-b-N14_URINOTH	0.06361	finn-b-N14_URINOTH
rs9536330	T	C	-0.0176	0.0105	0.0922805	Other diseases of urinary system || id:finn-b-N14_URINOTH	0.4721	finn-b-N14_URINOTH
rs11656361	A	C	0.0023	0.0136	0.8673	Other diseases of urinary system || id:finn-b-N14_URINOTH	0.182	finn-b-N14_URINOTH
rs62029761	A	G	0.0016	0.0234	0.9448	Other diseases of urinary system || id:finn-b-N14_URINOTH	0.05801	finn-b-N14_URINOTH
rs677208	C	G	0.0131	0.0139	0.3429	Other diseases of urinary system || id:finn-b-N14_URINOTH	0.8279	finn-b-N14_URINOTH
rs11077359	C	T	0.0053	0.0141	0.708401	Other diseases of urinary system || id:finn-b-N14_URINOTH	0.8298	finn-b-N14_URINOTH
rs10810043	G	A	0.0102	0.0111	0.3571	Other diseases of urinary system || id:finn-b-N14_URINOTH	0.6641	finn-b-N14_URINOTH
rs6469506	T	A	-0.0141	0.0111	0.2042	Other diseases of urinary system || id:finn-b-N14_URINOTH	0.3315	finn-b-N14_URINOTH
rs2909242	A	C	-0.0118	0.0111	0.287	Other diseases of urinary system || id:finn-b-N14_URINOTH	0.6689	finn-b-N14_URINOTH
rs7019909	T	C	-0.0147	0.016	0.3591	Other diseases of urinary system || id:finn-b-N14_URINOTH	0.1205	finn-b-N14_URINOTH
rs439810	C	G	-0.0016	0.0111	0.8863	Other diseases of urinary system || id:finn-b-N14_URINOTH	0.6714	finn-b-N14_URINOTH
rs12127733	G	A	0.0196	0.0136	0.1496	Other diseases of urinary system || id:finn-b-N14_URINOTH	0.1789	finn-b-N14_URINOTH
rs12748533	G	T	0.0031	0.0116	0.788199	Other diseases of urinary system || id:finn-b-N14_URINOTH	0.2886	finn-b-N14_URINOTH
rs6430926	T	C	0.0103	0.0105	0.3256	Other diseases of urinary system || id:finn-b-N14_URINOTH	0.5319	finn-b-N14_URINOTH
rs12638227	C	G	0.0078	0.0107	0.4641	Other diseases of urinary system || id:finn-b-N14_URINOTH	0.4201	finn-b-N14_URINOTH
rs10202904	G	T	-0.0063	0.0106	0.555699	Other diseases of urinary system || id:finn-b-N14_URINOTH	0.5918	finn-b-N14_URINOTH
rs314726	T	C	-0.0046	0.0105	0.658901	Other diseases of urinary system || id:finn-b-N14_URINOTH	0.4961	finn-b-N14_URINOTH
rs134366	A	G	0.0306	0.0207	0.139	Other diseases of urinary system || id:finn-b-N14_URINOTH	0.9316	finn-b-N14_URINOTH
rs117271932	A	G	0.0015	0.0226	0.9484	Other diseases of urinary system || id:finn-b-N14_URINOTH	0.0565	finn-b-N14_URINOTH
rs742016	A	G	-0.006	0.011	0.5857	Other diseases of urinary system || id:finn-b-N14_URINOTH	0.3344	finn-b-N14_URINOTH
rs36021379	A	G	-0.0307	0.0143	0.0320597	Other diseases of urinary system || id:finn-b-N14_URINOTH	0.1587	finn-b-N14_URINOTH
rs2833282	G	A	-0.0189	0.0146	0.1962	Other diseases of urinary system || id:finn-b-N14_URINOTH	0.1528	finn-b-N14_URINOTH
rs1882775	A	G	0.0139	0.0135	0.3037	Other diseases of urinary system || id:finn-b-N14_URINOTH	0.1828	finn-b-N14_URINOTH
rs11620597	T	C	-0.017	0.0338	0.6144	Other diseases of urinary system || id:finn-b-N14_URINOTH	0.02446	finn-b-N14_URINOTH
rs10138457	T	C	-0.0094	0.018	0.600999	Other diseases of urinary system || id:finn-b-N14_URINOTH	0.09299	finn-b-N14_URINOTH
rs111810795	C	T	-0.0062	0.0176	0.724101	Other diseases of urinary system || id:finn-b-N14_URINOTH	0.09783	finn-b-N14_URINOTH
rs10148250	A	G	-0.0107	0.0111	0.3337	Other diseases of urinary system || id:finn-b-N14_URINOTH	0.5829	finn-b-N14_URINOTH
rs1972694	T	A	0.0097	0.0136	0.4778	Other diseases of urinary system || id:finn-b-N14_URINOTH	0.1796	finn-b-N14_URINOTH
rs55773148	G	A	0.0205	0.0232	0.3759	Other diseases of urinary system || id:finn-b-N14_URINOTH	0.05304	finn-b-N14_URINOTH
rs75898026	A	G	0.0164	0.0129	0.2055	Other diseases of urinary system || id:finn-b-N14_URINOTH	0.2108	finn-b-N14_URINOTH
rs11627423	C	A	-0.0032	0.0108	0.766099	Other diseases of urinary system || id:finn-b-N14_URINOTH	0.367	finn-b-N14_URINOTH
rs8003149	C	T	-0.0103	0.0111	0.353	Other diseases of urinary system || id:finn-b-N14_URINOTH	0.3324	finn-b-N14_URINOTH
rs11160353	A	T	-0.0094	0.0106	0.3779	Other diseases of urinary system || id:finn-b-N14_URINOTH	0.5909	finn-b-N14_URINOTH
rs4575475	A	G	-0.0154	0.0124	0.2162	Other diseases of urinary system || id:finn-b-N14_URINOTH	0.77	finn-b-N14_URINOTH
rs2016057	C	A	-0.0066	0.0107	0.5351	Other diseases of urinary system || id:finn-b-N14_URINOTH	0.6136	finn-b-N14_URINOTH
rs8005030	C	T	0.012	0.0111	0.2778	Other diseases of urinary system || id:finn-b-N14_URINOTH	0.3315	finn-b-N14_URINOTH
rs12894272	G	A	0.0209	0.011	0.0570099	Other diseases of urinary system || id:finn-b-N14_URINOTH	0.663	finn-b-N14_URINOTH
rs11532348	C	T	0.0049	0.0147	0.739701	Other diseases of urinary system || id:finn-b-N14_URINOTH	0.1498	finn-b-N14_URINOTH
rs12434631	A	G	-0.0038	0.017	0.8255	Other diseases of urinary system || id:finn-b-N14_URINOTH	0.1059	finn-b-N14_URINOTH
rs71414120	T	G	-0.0254	0.0239	0.2882	Other diseases of urinary system || id:finn-b-N14_URINOTH	0.05111	finn-b-N14_URINOTH
rs6563550	T	C	-0.0024	0.0194	0.8993	Other diseases of urinary system || id:finn-b-N14_URINOTH	0.07824	finn-b-N14_URINOTH
rs12463378	A	G	0.0009	0.0114	0.9394	Other diseases of urinary system || id:finn-b-N14_URINOTH	0.3022	finn-b-N14_URINOTH
rs6082461	C	A	-0.0005	0.0129	0.9689	Other diseases of urinary system || id:finn-b-N14_URINOTH	0.7941	finn-b-N14_URINOTH
rs1287018	G	A	0.0036	0.0134	0.790901	Other diseases of urinary system || id:finn-b-N14_URINOTH	0.1861	finn-b-N14_URINOTH
rs6105066	T	C	-0.005	0.0118	0.6738	Other diseases of urinary system || id:finn-b-N14_URINOTH	0.2765	finn-b-N14_URINOTH
rs3852931	T	C	0.0056	0.011	0.611799	Other diseases of urinary system || id:finn-b-N14_URINOTH	0.611	finn-b-N14_URINOTH
rs62210023	A	G	-0.0077	0.011	0.485	Other diseases of urinary system || id:finn-b-N14_URINOTH	0.345	finn-b-N14_URINOTH
rs7247191	T	C	0.0035	0.0174	0.8419	Other diseases of urinary system || id:finn-b-N14_URINOTH	0.09946	finn-b-N14_URINOTH
rs12150865	C	T	0.0078	0.0104	0.4551	Other diseases of urinary system || id:finn-b-N14_URINOTH	0.4864	finn-b-N14_URINOTH
rs2846589	T	G	0.0214	0.0107	0.0450599	Other diseases of urinary system || id:finn-b-N14_URINOTH	0.5757	finn-b-N14_URINOTH
rs4799823	C	T	-0.0209	0.0135	0.1225	Other diseases of urinary system || id:finn-b-N14_URINOTH	0.1864	finn-b-N14_URINOTH
rs2156611	T	C	-0.0114	0.0104	0.2738	Other diseases of urinary system || id:finn-b-N14_URINOTH	0.5014	finn-b-N14_URINOTH
rs3827020	C	T	-0.0013	0.0132	0.9195	Other diseases of urinary system || id:finn-b-N14_URINOTH	0.1963	finn-b-N14_URINOTH
rs62215703	G	A	-0.0086	0.0126	0.4984	Other diseases of urinary system || id:finn-b-N14_URINOTH	0.2164	finn-b-N14_URINOTH
rs486484	A	G	-0.0007	0.0106	0.9472	Other diseases of urinary system || id:finn-b-N14_URINOTH	0.4255	finn-b-N14_URINOTH
rs59936925	A	T	-0.0028	0.0166	0.867	Other diseases of urinary system || id:finn-b-N14_URINOTH	0.1119	finn-b-N14_URINOTH
rs17343978	A	C	0.0072	0.0129	0.577801	Other diseases of urinary system || id:finn-b-N14_URINOTH	0.2044	finn-b-N14_URINOTH
rs2276529	C	G	0.0024	0.013	0.8551	Other diseases of urinary system || id:finn-b-N14_URINOTH	0.1999	finn-b-N14_URINOTH
rs9608249	A	G	-0.0113	0.0166	0.4977	Other diseases of urinary system || id:finn-b-N14_URINOTH	0.1126	finn-b-N14_URINOTH
rs73208162	A	G	-0.0173	0.0296	0.558399	Other diseases of urinary system || id:finn-b-N14_URINOTH	0.0324	finn-b-N14_URINOTH
rs7015093	G	A	-0.0068	0.0119	0.5679	Other diseases of urinary system || id:finn-b-N14_URINOTH	0.261	finn-b-N14_URINOTH
rs4738679	A	G	0.0083	0.0107	0.4363	Other diseases of urinary system || id:finn-b-N14_URINOTH	0.6148	finn-b-N14_URINOTH
rs768253	T	G	-0.0159	0.0105	0.1284	Other diseases of urinary system || id:finn-b-N14_URINOTH	0.4397	finn-b-N14_URINOTH
rs62531359	T	G	0.0096	0.0135	0.4765	Other diseases of urinary system || id:finn-b-N14_URINOTH	0.184	finn-b-N14_URINOTH
rs16894137	C	T	-0.0256	0.0154	0.0972389	Other diseases of urinary system || id:finn-b-N14_URINOTH	0.1302	finn-b-N14_URINOTH
rs941000	T	C	-0.0009	0.0109	0.9312	Other diseases of urinary system || id:finn-b-N14_URINOTH	0.636	finn-b-N14_URINOTH
rs17708276	A	G	0.0139	0.0176	0.4309	Other diseases of urinary system || id:finn-b-N14_URINOTH	0.109	finn-b-N14_URINOTH
rs62503162	A	G	-0.0296	0.0259	0.2526	Other diseases of urinary system || id:finn-b-N14_URINOTH	0.04288	finn-b-N14_URINOTH
rs66714985	A	C	0.0274	0.0173	0.1118	Other diseases of urinary system || id:finn-b-N14_URINOTH	0.1014	finn-b-N14_URINOTH
rs7832116	A	G	0.0158	0.0156	0.3115	Other diseases of urinary system || id:finn-b-N14_URINOTH	0.1288	finn-b-N14_URINOTH
rs2952020	A	G	-0.0108	0.0121	0.3744	Other diseases of urinary system || id:finn-b-N14_URINOTH	0.7513	finn-b-N14_URINOTH
rs2730183	G	A	0.0169	0.0106	0.1129	Other diseases of urinary system || id:finn-b-N14_URINOTH	0.3988	finn-b-N14_URINOTH
rs10093861	G	A	-0.0094	0.0106	0.3775	Other diseases of urinary system || id:finn-b-N14_URINOTH	0.4075	finn-b-N14_URINOTH
rs2791343	T	C	-0.0179	0.0107	0.0931494	Other diseases of urinary system || id:finn-b-N14_URINOTH	0.3968	finn-b-N14_URINOTH
rs872501	G	A	-0.0223	0.0197	0.2582	Other diseases of urinary system || id:finn-b-N14_URINOTH	0.09935	finn-b-N14_URINOTH
rs7827125	C	T	0.0101	0.0116	0.3839	Other diseases of urinary system || id:finn-b-N14_URINOTH	0.2802	finn-b-N14_URINOTH
rs35947731	C	T	-0.0164	0.0182	0.3678	Other diseases of urinary system || id:finn-b-N14_URINOTH	0.09023	finn-b-N14_URINOTH
rs77034621	T	G	0.0387	0.0402	0.3361	Other diseases of urinary system || id:finn-b-N14_URINOTH	0.01689	finn-b-N14_URINOTH
rs10965428	C	A	0.0078	0.0226	0.731499	Other diseases of urinary system || id:finn-b-N14_URINOTH	0.05638	finn-b-N14_URINOTH
rs72767435	T	C	-0.0091	0.0231	0.693	Other diseases of urinary system || id:finn-b-N14_URINOTH	0.05464	finn-b-N14_URINOTH
rs9895850	T	C	0.0205	0.0255	0.422	Other diseases of urinary system || id:finn-b-N14_URINOTH	0.04394	finn-b-N14_URINOTH
rs16941336	C	T	0.0041	0.0124	0.7413	Other diseases of urinary system || id:finn-b-N14_URINOTH	0.2311	finn-b-N14_URINOTH
rs117467633	T	C	0.0417	0.0269	0.1214	Other diseases of urinary system || id:finn-b-N14_URINOTH	0.04014	finn-b-N14_URINOTH
rs17781867	C	T	-0.012	0.0206	0.561699	Other diseases of urinary system || id:finn-b-N14_URINOTH	0.06948	finn-b-N14_URINOTH
rs62028349	G	C	0.0033	0.0105	0.756	Other diseases of urinary system || id:finn-b-N14_URINOTH	0.5152	finn-b-N14_URINOTH
rs7199484	G	A	0.0075	0.0113	0.5073	Other diseases of urinary system || id:finn-b-N14_URINOTH	0.306	finn-b-N14_URINOTH
rs35673018	G	A	-0.0133	0.0183	0.4654	Other diseases of urinary system || id:finn-b-N14_URINOTH	0.09015	finn-b-N14_URINOTH
rs8063430	T	C	-0.0217	0.0239	0.3646	Other diseases of urinary system || id:finn-b-N14_URINOTH	0.05043	finn-b-N14_URINOTH
rs78068103	A	G	0.003	0.0163	0.8557	Other diseases of urinary system || id:finn-b-N14_URINOTH	0.1164	finn-b-N14_URINOTH
rs11080344	C	T	0.0056	0.0105	0.5944	Other diseases of urinary system || id:finn-b-N14_URINOTH	0.4447	finn-b-N14_URINOTH
rs7213933	T	A	0.0103	0.0143	0.4704	Other diseases of urinary system || id:finn-b-N14_URINOTH	0.1592	finn-b-N14_URINOTH
rs34739816	G	T	0.0457	0.0224	0.0411699	Other diseases of urinary system || id:finn-b-N14_URINOTH	0.05819	finn-b-N14_URINOTH
rs9915817	C	T	0.005	0.0115	0.664401	Other diseases of urinary system || id:finn-b-N14_URINOTH	0.707	finn-b-N14_URINOTH
rs11079158	T	C	0.0139	0.0127	0.2736	Other diseases of urinary system || id:finn-b-N14_URINOTH	0.2165	finn-b-N14_URINOTH
rs34528142	C	G	-0.0053	0.013	0.6829	Other diseases of urinary system || id:finn-b-N14_URINOTH	0.2103	finn-b-N14_URINOTH
rs289410	A	G	0.0034	0.0116	0.768799	Other diseases of urinary system || id:finn-b-N14_URINOTH	0.7226	finn-b-N14_URINOTH
rs12446429	T	C	0.007	0.0136	0.604999	Other diseases of urinary system || id:finn-b-N14_URINOTH	0.1952	finn-b-N14_URINOTH
rs35344081	G	A	-0.0012	0.0118	0.9168	Other diseases of urinary system || id:finn-b-N14_URINOTH	0.2625	finn-b-N14_URINOTH
rs312757	G	C	-0.0096	0.0106	0.3634	Other diseases of urinary system || id:finn-b-N14_URINOTH	0.5861	finn-b-N14_URINOTH
rs9276029	A	G	-0.0066	0.0142	0.6434	Other diseases of urinary system || id:finn-b-N14_URINOTH	0.1954	finn-b-N14_URINOTH
rs6901560	C	G	0.0035	0.0134	0.791701	Other diseases of urinary system || id:finn-b-N14_URINOTH	0.1882	finn-b-N14_URINOTH
rs9470637	T	A	0.0012	0.0105	0.9107	Other diseases of urinary system || id:finn-b-N14_URINOTH	0.488	finn-b-N14_URINOTH
rs1569853	T	C	-0.0011	0.016	0.9455	Other diseases of urinary system || id:finn-b-N14_URINOTH	0.121	finn-b-N14_URINOTH
rs11221428	T	C	0.0155	0.0124	0.2136	Other diseases of urinary system || id:finn-b-N14_URINOTH	0.2263	finn-b-N14_URINOTH
rs78169027	A	G	0.0065	0.0222	0.769501	Other diseases of urinary system || id:finn-b-N14_URINOTH	0.06147	finn-b-N14_URINOTH
rs11052069	C	T	-0.0113	0.0105	0.2839	Other diseases of urinary system || id:finn-b-N14_URINOTH	0.559	finn-b-N14_URINOTH
rs75882962	T	C	-0.0146	0.0157	0.352	Other diseases of urinary system || id:finn-b-N14_URINOTH	0.127	finn-b-N14_URINOTH
rs4767113	C	T	-0.0045	0.0111	0.685799	Other diseases of urinary system || id:finn-b-N14_URINOTH	0.3278	finn-b-N14_URINOTH
rs12304031	G	A	0.0083	0.016	0.6031	Other diseases of urinary system || id:finn-b-N14_URINOTH	0.123	finn-b-N14_URINOTH
rs9581006	T	C	0.0215	0.0277	0.4386	Other diseases of urinary system || id:finn-b-N14_URINOTH	0.9633	finn-b-N14_URINOTH
rs2651663	A	G	-0.0076	0.0108	0.481599	Other diseases of urinary system || id:finn-b-N14_URINOTH	0.3899	finn-b-N14_URINOTH
rs1590596	C	G	-0.0214	0.0144	0.1368	Other diseases of urinary system || id:finn-b-N14_URINOTH	0.1597	finn-b-N14_URINOTH
rs61944774	A	G	-0.0051	0.0236	0.8294	Other diseases of urinary system || id:finn-b-N14_URINOTH	0.05307	finn-b-N14_URINOTH
rs113127095	A	G	-0.01	0.0263	0.7035	Other diseases of urinary system || id:finn-b-N14_URINOTH	0.04247	finn-b-N14_URINOTH
rs9574096	A	T	-0.0024	0.0108	0.8241	Other diseases of urinary system || id:finn-b-N14_URINOTH	0.3707	finn-b-N14_URINOTH
rs7117576	A	G	0.0179	0.0182	0.3261	Other diseases of urinary system || id:finn-b-N14_URINOTH	0.09131	finn-b-N14_URINOTH
rs6589457	G	A	0.0499	0.0239	0.0370903	Other diseases of urinary system || id:finn-b-N14_URINOTH	0.95	finn-b-N14_URINOTH
rs789068	G	A	0.0045	0.015	0.7615	Other diseases of urinary system || id:finn-b-N14_URINOTH	0.1411	finn-b-N14_URINOTH
rs4798126	G	A	0.0074	0.0132	0.5729	Other diseases of urinary system || id:finn-b-N14_URINOTH	0.1974	finn-b-N14_URINOTH
rs921925	A	C	0.0026	0.0127	0.8371	Other diseases of urinary system || id:finn-b-N14_URINOTH	0.2127	finn-b-N14_URINOTH
rs599752	T	C	0.0088	0.0117	0.4531	Other diseases of urinary system || id:finn-b-N14_URINOTH	0.7259	finn-b-N14_URINOTH
rs11655079	T	C	0.0236	0.0134	0.0781304	Other diseases of urinary system || id:finn-b-N14_URINOTH	0.1862	finn-b-N14_URINOTH
rs59865771	C	T	0.0109	0.011	0.3202	Other diseases of urinary system || id:finn-b-N14_URINOTH	0.341	finn-b-N14_URINOTH
rs55799124	A	G	-0.0189	0.0118	0.1101	Other diseases of urinary system || id:finn-b-N14_URINOTH	0.2769	finn-b-N14_URINOTH
rs34561138	G	A	-0.0496	0.0273	0.06925	Other diseases of urinary system || id:finn-b-N14_URINOTH	0.03884	finn-b-N14_URINOTH
rs67476743	T	G	0.0243	0.0118	0.0403497	Other diseases of urinary system || id:finn-b-N14_URINOTH	0.2727	finn-b-N14_URINOTH
rs1363769	C	T	0.0164	0.0296	0.579301	Other diseases of urinary system || id:finn-b-N14_URINOTH	0.968	finn-b-N14_URINOTH
rs35866622	T	C	-0.0135	0.011	0.2201	Other diseases of urinary system || id:finn-b-N14_URINOTH	0.3387	finn-b-N14_URINOTH
rs61267978	T	C	0.015	0.016	0.3489	Other diseases of urinary system || id:finn-b-N14_URINOTH	0.1214	finn-b-N14_URINOTH
rs12964517	G	A	0.0133	0.0116	0.2524	Other diseases of urinary system || id:finn-b-N14_URINOTH	0.2825	finn-b-N14_URINOTH
rs2114713	G	T	0.0038	0.0105	0.7205	Other diseases of urinary system || id:finn-b-N14_URINOTH	0.4492	finn-b-N14_URINOTH
rs17138946	G	T	-0.0023	0.0209	0.9123	Other diseases of urinary system || id:finn-b-N14_URINOTH	0.06645	finn-b-N14_URINOTH
rs55888180	C	G	0.0125	0.0232	0.590599	Other diseases of urinary system || id:finn-b-N14_URINOTH	0.05411	finn-b-N14_URINOTH
rs540489	T	G	-0.0062	0.0137	0.6513	Other diseases of urinary system || id:finn-b-N14_URINOTH	0.1759	finn-b-N14_URINOTH
rs3756315	A	G	0.0085	0.0114	0.4593	Other diseases of urinary system || id:finn-b-N14_URINOTH	0.2965	finn-b-N14_URINOTH
rs116261629	G	C	0.0134	0.018	0.4565	Other diseases of urinary system || id:finn-b-N14_URINOTH	0.09326	finn-b-N14_URINOTH
rs12208226	C	A	-0.0005	0.0169	0.9759	Other diseases of urinary system || id:finn-b-N14_URINOTH	0.1064	finn-b-N14_URINOTH
rs3804326	A	G	0.0139	0.0242	0.5654	Other diseases of urinary system || id:finn-b-N14_URINOTH	0.0497	finn-b-N14_URINOTH
rs28757219	T	A	-0.0315	0.0162	0.0515003	Other diseases of urinary system || id:finn-b-N14_URINOTH	0.1207	finn-b-N14_URINOTH
rs1923415	A	G	-0.0036	0.0184	0.8455	Other diseases of urinary system || id:finn-b-N14_URINOTH	0.08805	finn-b-N14_URINOTH
rs6918730	A	G	-0.0128	0.0219	0.5585	Other diseases of urinary system || id:finn-b-N14_URINOTH	0.9396	finn-b-N14_URINOTH
rs17086536	C	A	0.0189	0.02	0.3456	Other diseases of urinary system || id:finn-b-N14_URINOTH	0.07364	finn-b-N14_URINOTH
rs6910935	G	A	0.0328	0.0219	0.1335	Other diseases of urinary system || id:finn-b-N14_URINOTH	0.9398	finn-b-N14_URINOTH
rs2842896	C	T	-0.0091	0.0106	0.3925	Other diseases of urinary system || id:finn-b-N14_URINOTH	0.5867	finn-b-N14_URINOTH
rs2171249	C	T	-0.0373	0.0203	0.06665	Other diseases of urinary system || id:finn-b-N14_URINOTH	0.07414	finn-b-N14_URINOTH
rs76671854	C	G	-0.0177	0.0159	0.2649	Other diseases of urinary system || id:finn-b-N14_URINOTH	0.1245	finn-b-N14_URINOTH
rs2546432	C	T	-0.0049	0.0105	0.643899	Other diseases of urinary system || id:finn-b-N14_URINOTH	0.5436	finn-b-N14_URINOTH
rs1492620	T	C	0.0028	0.0156	0.8562	Other diseases of urinary system || id:finn-b-N14_URINOTH	0.1313	finn-b-N14_URINOTH
rs74352383	T	A	0.0006	0.019	0.9752	Other diseases of urinary system || id:finn-b-N14_URINOTH	0.08218	finn-b-N14_URINOTH
rs9349825	A	G	0.0147	0.0134	0.2721	Other diseases of urinary system || id:finn-b-N14_URINOTH	0.1896	finn-b-N14_URINOTH
rs62478070	T	G	-0.0158	0.0333	0.635199	Other diseases of urinary system || id:finn-b-N14_URINOTH	0.02562	finn-b-N14_URINOTH
rs17235252	T	C	0.0273	0.0162	0.0913103	Other diseases of urinary system || id:finn-b-N14_URINOTH	0.1194	finn-b-N14_URINOTH
rs12002250	A	C	-0.0647	0.0259	0.01245	Other diseases of urinary system || id:finn-b-N14_URINOTH	0.04292	finn-b-N14_URINOTH
rs16934185	A	G	0.0288	0.0171	0.0933899	Other diseases of urinary system || id:finn-b-N14_URINOTH	0.1033	finn-b-N14_URINOTH
rs1571225	T	C	0.0025	0.0141	0.8568	Other diseases of urinary system || id:finn-b-N14_URINOTH	0.8348	finn-b-N14_URINOTH
rs10964441	G	A	0.0177	0.0171	0.3003	Other diseases of urinary system || id:finn-b-N14_URINOTH	0.1045	finn-b-N14_URINOTH
rs1928659	T	C	-0.009	0.013	0.4887	Other diseases of urinary system || id:finn-b-N14_URINOTH	0.2027	finn-b-N14_URINOTH
rs74757828	A	T	0.0137	0.0197	0.4869	Other diseases of urinary system || id:finn-b-N14_URINOTH	0.07566	finn-b-N14_URINOTH
rs116151565	A	G	-0.0161	0.0162	0.3204	Other diseases of urinary system || id:finn-b-N14_URINOTH	0.1224	finn-b-N14_URINOTH
rs56250014	A	T	-0.0196	0.0179	0.2758	Other diseases of urinary system || id:finn-b-N14_URINOTH	0.09349	finn-b-N14_URINOTH
rs2447496	A	G	0.0087	0.0118	0.4617	Other diseases of urinary system || id:finn-b-N14_URINOTH	0.7316	finn-b-N14_URINOTH
rs7823228	C	G	0.0122	0.0139	0.3832	Other diseases of urinary system || id:finn-b-N14_URINOTH	0.8294	finn-b-N14_URINOTH
rs62570196	C	T	0.0015	0.0263	0.9554	Other diseases of urinary system || id:finn-b-N14_URINOTH	0.04195	finn-b-N14_URINOTH
rs7077363	G	A	0.0196	0.0141	0.164	Other diseases of urinary system || id:finn-b-N14_URINOTH	0.1628	finn-b-N14_URINOTH
rs11591622	T	G	-0.0149	0.0142	0.293	Other diseases of urinary system || id:finn-b-N14_URINOTH	0.162	finn-b-N14_URINOTH
rs4385846	T	G	0.0308	0.0133	0.02031	Other diseases of urinary system || id:finn-b-N14_URINOTH	0.8062	finn-b-N14_URINOTH
rs2153460	A	T	-0.0065	0.014	0.645199	Other diseases of urinary system || id:finn-b-N14_URINOTH	0.164	finn-b-N14_URINOTH
rs2913110	T	C	0.006	0.0109	0.5851	Other diseases of urinary system || id:finn-b-N14_URINOTH	0.6502	finn-b-N14_URINOTH
rs7076829	T	A	0.0185	0.0109	0.0892894	Other diseases of urinary system || id:finn-b-N14_URINOTH	0.375	finn-b-N14_URINOTH
rs1254846	A	G	-0.0021	0.0155	0.8907	Other diseases of urinary system || id:finn-b-N14_URINOTH	0.8558	finn-b-N14_URINOTH
rs60995569	T	G	0.0094	0.0167	0.5752	Other diseases of urinary system || id:finn-b-N14_URINOTH	0.1098	finn-b-N14_URINOTH
rs719099	A	G	0.0043	0.0175	0.8046	Other diseases of urinary system || id:finn-b-N14_URINOTH	0.09886	finn-b-N14_URINOTH
rs4344384	T	G	0.0007	0.0105	0.9483	Other diseases of urinary system || id:finn-b-N14_URINOTH	0.5041	finn-b-N14_URINOTH
rs71481756	T	G	-0.0105	0.0215	0.624701	Other diseases of urinary system || id:finn-b-N14_URINOTH	0.06595	finn-b-N14_URINOTH
rs61841040	G	T	0.0136	0.0132	0.3009	Other diseases of urinary system || id:finn-b-N14_URINOTH	0.1967	finn-b-N14_URINOTH
rs12261792	T	G	0.0069	0.0142	0.6252	Other diseases of urinary system || id:finn-b-N14_URINOTH	0.1615	finn-b-N14_URINOTH
rs11764871	G	T	-0.0077	0.0113	0.4982	Other diseases of urinary system || id:finn-b-N14_URINOTH	0.3047	finn-b-N14_URINOTH
rs7826267	G	T	0.0227	0.0213	0.2854	Other diseases of urinary system || id:finn-b-N14_URINOTH	0.9308	finn-b-N14_URINOTH
rs34402072	C	T	0.0076	0.0148	0.6077	Other diseases of urinary system || id:finn-b-N14_URINOTH	0.1465	finn-b-N14_URINOTH
rs17067892	C	T	0.0082	0.0184	0.656	Other diseases of urinary system || id:finn-b-N14_URINOTH	0.08742	finn-b-N14_URINOTH
rs10233278	T	C	-0.0186	0.0106	0.0774604	Other diseases of urinary system || id:finn-b-N14_URINOTH	0.5554	finn-b-N14_URINOTH
rs2729556	T	C	-0.0063	0.0105	0.5508	Other diseases of urinary system || id:finn-b-N14_URINOTH	0.5227	finn-b-N14_URINOTH
rs56203279	T	C	-0.0007	0.011	0.9462	Other diseases of urinary system || id:finn-b-N14_URINOTH	0.3356	finn-b-N14_URINOTH
rs28603357	T	C	0.0482	0.0374	0.1977	Other diseases of urinary system || id:finn-b-N14_URINOTH	0.02007	finn-b-N14_URINOTH
rs6969323	A	C	0.0031	0.0126	0.8072	Other diseases of urinary system || id:finn-b-N14_URINOTH	0.2195	finn-b-N14_URINOTH
rs6474512	C	A	-0.0121	0.0107	0.2598	Other diseases of urinary system || id:finn-b-N14_URINOTH	0.612	finn-b-N14_URINOTH
rs1447205	C	G	0.0158	0.0109	0.1463	Other diseases of urinary system || id:finn-b-N14_URINOTH	0.6394	finn-b-N14_URINOTH
rs12056802	C	G	-0.0201	0.0157	0.1994	Other diseases of urinary system || id:finn-b-N14_URINOTH	0.1269	finn-b-N14_URINOTH
rs823424	G	A	0.0071	0.012	0.552901	Other diseases of urinary system || id:finn-b-N14_URINOTH	0.2542	finn-b-N14_URINOTH
rs2683313	G	A	-0.0025	0.0112	0.8211	Other diseases of urinary system || id:finn-b-N14_URINOTH	0.6859	finn-b-N14_URINOTH
rs10464997	G	A	0.0036	0.0135	0.7914	Other diseases of urinary system || id:finn-b-N14_URINOTH	0.1847	finn-b-N14_URINOTH
rs72647048	T	C	0.0316	0.0165	0.0559204	Other diseases of urinary system || id:finn-b-N14_URINOTH	0.1122	finn-b-N14_URINOTH
rs55744759	A	G	0.0313	0.0165	0.0579202	Other diseases of urinary system || id:finn-b-N14_URINOTH	0.1122	finn-b-N14_URINOTH
rs80083040	T	G	0.0031	0.0255	0.9033	Other diseases of urinary system || id:finn-b-N14_URINOTH	0.04437	finn-b-N14_URINOTH
rs13258851	A	G	-0.0051	0.015	0.731301	Other diseases of urinary system || id:finn-b-N14_URINOTH	0.1415	finn-b-N14_URINOTH
rs72948274	A	C	-0.0096	0.0214	0.6524	Other diseases of urinary system || id:finn-b-N14_URINOTH	0.06356	finn-b-N14_URINOTH
rs663262	C	T	0.0526	0.0293	0.0723902	Other diseases of urinary system || id:finn-b-N14_URINOTH	0.9669	finn-b-N14_URINOTH
rs11018566	A	G	-0.0292	0.0233	0.2103	Other diseases of urinary system || id:finn-b-N14_URINOTH	0.05344	finn-b-N14_URINOTH
rs10890671	C	T	-0.0049	0.0105	0.642899	Other diseases of urinary system || id:finn-b-N14_URINOTH	0.437	finn-b-N14_URINOTH
rs949341	A	G	-0.0076	0.0117	0.5144	Other diseases of urinary system || id:finn-b-N14_URINOTH	0.7213	finn-b-N14_URINOTH
rs118170811	A	G	0.0094	0.0302	0.756201	Other diseases of urinary system || id:finn-b-N14_URINOTH	0.03083	finn-b-N14_URINOTH
rs12278566	T	A	0.0103	0.0118	0.3866	Other diseases of urinary system || id:finn-b-N14_URINOTH	0.2663	finn-b-N14_URINOTH
rs116847295	C	T	-0.0171	0.0157	0.2737	Other diseases of urinary system || id:finn-b-N14_URINOTH	0.1271	finn-b-N14_URINOTH
rs7104872	G	A	0.0177	0.0167	0.2909	Other diseases of urinary system || id:finn-b-N14_URINOTH	0.1104	finn-b-N14_URINOTH
rs7766680	G	C	0.0124	0.0125	0.3195	Other diseases of urinary system || id:finn-b-N14_URINOTH	0.2247	finn-b-N14_URINOTH
rs9347879	T	C	0.0148	0.0104	0.1555	Other diseases of urinary system || id:finn-b-N14_URINOTH	0.4888	finn-b-N14_URINOTH
rs80309088	G	A	-0.0035	0.0161	0.8297	Other diseases of urinary system || id:finn-b-N14_URINOTH	0.119	finn-b-N14_URINOTH
rs6952765	G	A	0.0003	0.0112	0.9766	Other diseases of urinary system || id:finn-b-N14_URINOTH	0.3184	finn-b-N14_URINOTH
rs1020520	T	G	-0.0171	0.0146	0.2406	Other diseases of urinary system || id:finn-b-N14_URINOTH	0.1515	finn-b-N14_URINOTH
rs13239072	G	A	-0.0025	0.0117	0.833	Other diseases of urinary system || id:finn-b-N14_URINOTH	0.2757	finn-b-N14_URINOTH
rs66473610	T	G	-0.0198	0.0161	0.2197	Other diseases of urinary system || id:finn-b-N14_URINOTH	0.119	finn-b-N14_URINOTH
rs2248146	T	C	-0.006	0.011	0.5857	Other diseases of urinary system || id:finn-b-N14_URINOTH	0.3449	finn-b-N14_URINOTH
rs17168302	G	A	-0.0237	0.017	0.1637	Other diseases of urinary system || id:finn-b-N14_URINOTH	0.1065	finn-b-N14_URINOTH
rs6958419	C	T	0.012	0.0104	0.2513	Other diseases of urinary system || id:finn-b-N14_URINOTH	0.465	finn-b-N14_URINOTH
rs4400279	A	G	-0.0148	0.0111	0.1842	Other diseases of urinary system || id:finn-b-N14_URINOTH	0.3235	finn-b-N14_URINOTH
rs62448869	T	A	0.0229	0.0106	0.0301801	Other diseases of urinary system || id:finn-b-N14_URINOTH	0.5358	finn-b-N14_URINOTH
rs62448871	C	A	0.0229	0.0106	0.0297598	Other diseases of urinary system || id:finn-b-N14_URINOTH	0.5359	finn-b-N14_URINOTH
rs2074723	T	C	0.0044	0.0232	0.8512	Other diseases of urinary system || id:finn-b-N14_URINOTH	0.05308	finn-b-N14_URINOTH
rs10808115	C	A	-0.0056	0.0104	0.5919	Other diseases of urinary system || id:finn-b-N14_URINOTH	0.5116	finn-b-N14_URINOTH
rs2686790	C	T	0.0026	0.0147	0.8575	Other diseases of urinary system || id:finn-b-N14_URINOTH	0.8527	finn-b-N14_URINOTH
rs35156985	T	C	-0.017	0.0261	0.515901	Other diseases of urinary system || id:finn-b-N14_URINOTH	0.04201	finn-b-N14_URINOTH
rs10458299	T	C	-0.0234	0.0199	0.2402	Other diseases of urinary system || id:finn-b-N14_URINOTH	0.07438	finn-b-N14_URINOTH
rs55756211	T	C	-0.0042	0.0201	0.8351	Other diseases of urinary system || id:finn-b-N14_URINOTH	0.07266	finn-b-N14_URINOTH
rs74776516	T	G	-0.0019	0.021	0.9292	Other diseases of urinary system || id:finn-b-N14_URINOTH	0.06671	finn-b-N14_URINOTH
rs3752849	G	A	-0.0244	0.0239	0.3077	Other diseases of urinary system || id:finn-b-N14_URINOTH	0.05005	finn-b-N14_URINOTH
rs34066017	A	G	0.0116	0.0129	0.3689	Other diseases of urinary system || id:finn-b-N14_URINOTH	0.2056	finn-b-N14_URINOTH
rs10501370	C	T	0.0229	0.0216	0.2892	Other diseases of urinary system || id:finn-b-N14_URINOTH	0.06273	finn-b-N14_URINOTH
rs517089	T	A	0.017	0.0139	0.221	Other diseases of urinary system || id:finn-b-N14_URINOTH	0.1693	finn-b-N14_URINOTH
rs10794359	C	T	-0.0147	0.0106	0.1659	Other diseases of urinary system || id:finn-b-N14_URINOTH	0.5348	finn-b-N14_URINOTH
rs182318	G	A	0.0001	0.0192	0.9947	Other diseases of urinary system || id:finn-b-N14_URINOTH	0.08034	finn-b-N14_URINOTH
rs17379710	T	C	0.0126	0.0106	0.235	Other diseases of urinary system || id:finn-b-N14_URINOTH	0.4101	finn-b-N14_URINOTH
rs2644213	A	G	0.001	0.0113	0.9281	Other diseases of urinary system || id:finn-b-N14_URINOTH	0.6941	finn-b-N14_URINOTH
rs61841503	G	A	-0.0237	0.0156	0.1275	Other diseases of urinary system || id:finn-b-N14_URINOTH	0.1293	finn-b-N14_URINOTH
rs876734	T	C	-0.0119	0.0117	0.3068	Other diseases of urinary system || id:finn-b-N14_URINOTH	0.7171	finn-b-N14_URINOTH
rs11109097	T	C	-0.0173	0.0105	0.1001	Other diseases of urinary system || id:finn-b-N14_URINOTH	0.5085	finn-b-N14_URINOTH
rs1969927	A	G	-0.0027	0.0111	0.8064	Other diseases of urinary system || id:finn-b-N14_URINOTH	0.6652	finn-b-N14_URINOTH
rs35110698	T	C	0.0072	0.0148	0.6246	Other diseases of urinary system || id:finn-b-N14_URINOTH	0.1465	finn-b-N14_URINOTH
rs17519472	C	T	0.0048	0.0151	0.751799	Other diseases of urinary system || id:finn-b-N14_URINOTH	0.1398	finn-b-N14_URINOTH
rs773123	T	A	0.0048	0.0159	0.7618	Other diseases of urinary system || id:finn-b-N14_URINOTH	0.1216	finn-b-N14_URINOTH
rs12419854	T	A	-0.0005	0.0118	0.9664	Other diseases of urinary system || id:finn-b-N14_URINOTH	0.2712	finn-b-N14_URINOTH
rs2875322	C	T	-0.0072	0.0139	0.605701	Other diseases of urinary system || id:finn-b-N14_URINOTH	0.8295	finn-b-N14_URINOTH
rs7302582	G	C	0.0253	0.0231	0.2718	Other diseases of urinary system || id:finn-b-N14_URINOTH	0.05383	finn-b-N14_URINOTH
rs10123122	G	C	-0.0016	0.0274	0.9544	Other diseases of urinary system || id:finn-b-N14_URINOTH	0.03754	finn-b-N14_URINOTH
rs4596722	G	A	-0.011	0.0104	0.2942	Other diseases of urinary system || id:finn-b-N14_URINOTH	0.5002	finn-b-N14_URINOTH
rs77910827	C	T	0.0075	0.0168	0.656999	Other diseases of urinary system || id:finn-b-N14_URINOTH	0.1082	finn-b-N14_URINOTH
rs17791387	A	G	-0.026	0.0178	0.1448	Other diseases of urinary system || id:finn-b-N14_URINOTH	0.09533	finn-b-N14_URINOTH
rs35524804	T	C	-0.012	0.0127	0.3445	Other diseases of urinary system || id:finn-b-N14_URINOTH	0.214	finn-b-N14_URINOTH
rs9299345	T	C	-0.0053	0.0176	0.763199	Other diseases of urinary system || id:finn-b-N14_URINOTH	0.09611	finn-b-N14_URINOTH
rs10738747	A	G	-0.002	0.0105	0.8513	Other diseases of urinary system || id:finn-b-N14_URINOTH	0.565	finn-b-N14_URINOTH
rs62532512	A	C	-0.0004	0.0105	0.9704	Other diseases of urinary system || id:finn-b-N14_URINOTH	0.5683	finn-b-N14_URINOTH
rs56105232	G	A	-0.0018	0.022	0.9352	Other diseases of urinary system || id:finn-b-N14_URINOTH	0.0626	finn-b-N14_URINOTH
rs75949021	T	C	-0.0341	0.0266	0.2002	Other diseases of urinary system || id:finn-b-N14_URINOTH	0.03972	finn-b-N14_URINOTH
rs34569731	G	A	0.0007	0.0109	0.95	Other diseases of urinary system || id:finn-b-N14_URINOTH	0.5757	finn-b-N14_URINOTH
rs111373036	A	G	0.0258	0.0149	0.0835391	Other diseases of urinary system || id:finn-b-N14_URINOTH	0.1425	finn-b-N14_URINOTH
rs79968172	G	A	0.0216	0.0221	0.3294	Other diseases of urinary system || id:finn-b-N14_URINOTH	0.05901	finn-b-N14_URINOTH
rs17612835	G	A	0.0065	0.0166	0.694201	Other diseases of urinary system || id:finn-b-N14_URINOTH	0.1127	finn-b-N14_URINOTH
rs13005175	G	A	-0.0127	0.0254	0.616601	Other diseases of urinary system || id:finn-b-N14_URINOTH	0.9555	finn-b-N14_URINOTH
rs13385922	T	C	0.0249	0.011	0.02305	Other diseases of urinary system || id:finn-b-N14_URINOTH	0.3471	finn-b-N14_URINOTH
rs77655283	G	A	0.0203	0.0205	0.3224	Other diseases of urinary system || id:finn-b-N14_URINOTH	0.06967	finn-b-N14_URINOTH
rs62181700	G	A	-0.0146	0.0121	0.2298	Other diseases of urinary system || id:finn-b-N14_URINOTH	0.2451	finn-b-N14_URINOTH
rs3935584	C	T	0.0124	0.0105	0.2376	Other diseases of urinary system || id:finn-b-N14_URINOTH	0.5319	finn-b-N14_URINOTH
rs7573569	T	C	0.0088	0.0217	0.6853	Other diseases of urinary system || id:finn-b-N14_URINOTH	0.061	finn-b-N14_URINOTH
rs12151423	G	A	0.005	0.0104	0.6337	Other diseases of urinary system || id:finn-b-N14_URINOTH	0.4815	finn-b-N14_URINOTH
rs7569771	A	G	0.0097	0.0121	0.422	Other diseases of urinary system || id:finn-b-N14_URINOTH	0.248	finn-b-N14_URINOTH
rs13025464	C	T	-0.0101	0.0107	0.343	Other diseases of urinary system || id:finn-b-N14_URINOTH	0.5968	finn-b-N14_URINOTH
rs2191834	T	G	-0.0108	0.0122	0.3774	Other diseases of urinary system || id:finn-b-N14_URINOTH	0.76	finn-b-N14_URINOTH
rs4146051	G	A	-0.0359	0.0194	0.0641003	Other diseases of urinary system || id:finn-b-N14_URINOTH	0.9171	finn-b-N14_URINOTH
rs2371572	A	C	-0.0027	0.0105	0.7956	Other diseases of urinary system || id:finn-b-N14_URINOTH	0.4661	finn-b-N14_URINOTH
rs73113483	T	A	-0.0088	0.0159	0.580301	Other diseases of urinary system || id:finn-b-N14_URINOTH	0.1245	finn-b-N14_URINOTH
rs4955951	A	G	0.0022	0.0163	0.8909	Other diseases of urinary system || id:finn-b-N14_URINOTH	0.1169	finn-b-N14_URINOTH
rs17061716	G	C	0.0122	0.0143	0.3938	Other diseases of urinary system || id:finn-b-N14_URINOTH	0.1573	finn-b-N14_URINOTH
rs13068444	A	G	-0.0101	0.0137	0.4615	Other diseases of urinary system || id:finn-b-N14_URINOTH	0.1771	finn-b-N14_URINOTH
rs2861203	G	A	0.0269	0.0115	0.0190498	Other diseases of urinary system || id:finn-b-N14_URINOTH	0.3003	finn-b-N14_URINOTH
rs4916508	A	G	-0.0016	0.0106	0.8775	Other diseases of urinary system || id:finn-b-N14_URINOTH	0.5763	finn-b-N14_URINOTH
rs116270582	T	A	-0.0192	0.0261	0.462	Other diseases of urinary system || id:finn-b-N14_URINOTH	0.04705	finn-b-N14_URINOTH
rs73199919	T	C	0.0033	0.0243	0.8929	Other diseases of urinary system || id:finn-b-N14_URINOTH	0.04935	finn-b-N14_URINOTH
rs4928024	G	A	-0.0212	0.0135	0.1162	Other diseases of urinary system || id:finn-b-N14_URINOTH	0.8146	finn-b-N14_URINOTH
rs11128180	A	G	-0.0015	0.0123	0.901	Other diseases of urinary system || id:finn-b-N14_URINOTH	0.2327	finn-b-N14_URINOTH
rs35228298	G	A	-0.0172	0.0143	0.227	Other diseases of urinary system || id:finn-b-N14_URINOTH	0.1606	finn-b-N14_URINOTH
rs7627405	C	T	-0.0276	0.0132	0.0369097	Other diseases of urinary system || id:finn-b-N14_URINOTH	0.2021	finn-b-N14_URINOTH
rs9813022	A	G	-0.0147	0.0108	0.1729	Other diseases of urinary system || id:finn-b-N14_URINOTH	0.3754	finn-b-N14_URINOTH
rs11709800	T	C	0.0162	0.014	0.2463	Other diseases of urinary system || id:finn-b-N14_URINOTH	0.1687	finn-b-N14_URINOTH
rs511258	G	A	0.0107	0.0133	0.4215	Other diseases of urinary system || id:finn-b-N14_URINOTH	0.1869	finn-b-N14_URINOTH
rs11941716	A	G	0.0298	0.0148	0.0443496	Other diseases of urinary system || id:finn-b-N14_URINOTH	0.1517	finn-b-N14_URINOTH
rs35042269	C	A	0.0156	0.0165	0.3449	Other diseases of urinary system || id:finn-b-N14_URINOTH	0.1138	finn-b-N14_URINOTH
rs2159863	A	G	-0.0112	0.0135	0.4072	Other diseases of urinary system || id:finn-b-N14_URINOTH	0.1806	finn-b-N14_URINOTH
rs2193878	T	A	0.0477	0.0336	0.156	Other diseases of urinary system || id:finn-b-N14_URINOTH	0.0246	finn-b-N14_URINOTH
rs7561370	C	T	-0.0084	0.0146	0.567799	Other diseases of urinary system || id:finn-b-N14_URINOTH	0.8504	finn-b-N14_URINOTH
rs6660520	G	A	0.0049	0.0117	0.6758	Other diseases of urinary system || id:finn-b-N14_URINOTH	0.7288	finn-b-N14_URINOTH
rs3125832	A	C	0.0089	0.0125	0.475501	Other diseases of urinary system || id:finn-b-N14_URINOTH	0.2262	finn-b-N14_URINOTH
rs10797540	A	G	-0.0144	0.0105	0.1713	Other diseases of urinary system || id:finn-b-N14_URINOTH	0.4442	finn-b-N14_URINOTH
rs16840310	G	A	0.0102	0.0106	0.3358	Other diseases of urinary system || id:finn-b-N14_URINOTH	0.5688	finn-b-N14_URINOTH
rs11126423	T	C	0.0352	0.0183	0.0550795	Other diseases of urinary system || id:finn-b-N14_URINOTH	0.9057	finn-b-N14_URINOTH
rs61702987	T	C	-0.0339	0.0168	0.0430002	Other diseases of urinary system || id:finn-b-N14_URINOTH	0.1092	finn-b-N14_URINOTH
rs12618201	A	G	-0.0118	0.0105	0.2612	Other diseases of urinary system || id:finn-b-N14_URINOTH	0.4415	finn-b-N14_URINOTH
rs72939513	A	G	-0.0053	0.0238	0.8225	Other diseases of urinary system || id:finn-b-N14_URINOTH	0.05126	finn-b-N14_URINOTH
rs6657302	T	C	-0.0192	0.0214	0.3697	Other diseases of urinary system || id:finn-b-N14_URINOTH	0.06323	finn-b-N14_URINOTH
rs305411	A	G	0.0018	0.0173	0.9156	Other diseases of urinary system || id:finn-b-N14_URINOTH	0.1035	finn-b-N14_URINOTH
rs12049045	A	G	0.0025	0.0107	0.8145	Other diseases of urinary system || id:finn-b-N14_URINOTH	0.3831	finn-b-N14_URINOTH
rs7521171	A	G	-0.0178	0.0114	0.1168	Other diseases of urinary system || id:finn-b-N14_URINOTH	0.6896	finn-b-N14_URINOTH
rs2817172	C	T	0.0018	0.0107	0.8667	Other diseases of urinary system || id:finn-b-N14_URINOTH	0.3961	finn-b-N14_URINOTH
rs12124567	A	G	0.0289	0.0131	0.0276503	Other diseases of urinary system || id:finn-b-N14_URINOTH	0.2034	finn-b-N14_URINOTH
rs4378146	A	C	0.0111	0.012	0.3528	Other diseases of urinary system || id:finn-b-N14_URINOTH	0.2555	finn-b-N14_URINOTH
rs10158360	T	G	-0.0192	0.0108	0.0753998	Other diseases of urinary system || id:finn-b-N14_URINOTH	0.3816	finn-b-N14_URINOTH
rs2801960	G	C	-0.0149	0.0114	0.192	Other diseases of urinary system || id:finn-b-N14_URINOTH	0.7036	finn-b-N14_URINOTH
rs12125734	G	T	-0.0067	0.018	0.708	Other diseases of urinary system || id:finn-b-N14_URINOTH	0.09347	finn-b-N14_URINOTH
rs1612733	T	C	-0.0172	0.0232	0.4578	Other diseases of urinary system || id:finn-b-N14_URINOTH	0.05453	finn-b-N14_URINOTH
rs11586410	G	A	-0.0042	0.0145	0.771999	Other diseases of urinary system || id:finn-b-N14_URINOTH	0.1579	finn-b-N14_URINOTH
rs75285799	T	C	0.0038	0.0143	0.7895	Other diseases of urinary system || id:finn-b-N14_URINOTH	0.1572	finn-b-N14_URINOTH
rs61806970	C	T	0.0173	0.0208	0.4052	Other diseases of urinary system || id:finn-b-N14_URINOTH	0.06788	finn-b-N14_URINOTH
rs12144792	C	T	-0.0033	0.0108	0.7603	Other diseases of urinary system || id:finn-b-N14_URINOTH	0.3757	finn-b-N14_URINOTH
rs2817174	C	T	0.0088	0.0107	0.4105	Other diseases of urinary system || id:finn-b-N14_URINOTH	0.3954	finn-b-N14_URINOTH
rs12030302	G	A	-0.0029	0.0105	0.7824	Other diseases of urinary system || id:finn-b-N14_URINOTH	0.5281	finn-b-N14_URINOTH
rs6577484	G	A	-0.0128	0.0174	0.4624	Other diseases of urinary system || id:finn-b-N14_URINOTH	0.1043	finn-b-N14_URINOTH
rs710230	C	T	0.0359	0.0203	0.0761395	Other diseases of urinary system || id:finn-b-N14_URINOTH	0.9276	finn-b-N14_URINOTH
rs10875374	T	C	0.0044	0.0104	0.671301	Other diseases of urinary system || id:finn-b-N14_URINOTH	0.5293	finn-b-N14_URINOTH
rs12072562	T	C	0.0282	0.0271	0.2979	Other diseases of urinary system || id:finn-b-N14_URINOTH	0.03876	finn-b-N14_URINOTH
rs35559912	T	C	-0.0296	0.016	0.0652094	Other diseases of urinary system || id:finn-b-N14_URINOTH	0.121	finn-b-N14_URINOTH
rs72738886	T	C	-0.0423	0.0197	0.0318801	Other diseases of urinary system || id:finn-b-N14_URINOTH	0.07613	finn-b-N14_URINOTH
rs10941294	C	T	-0.0032	0.0231	0.89	Other diseases of urinary system || id:finn-b-N14_URINOTH	0.05429	finn-b-N14_URINOTH
rs12206468	G	A	0.0272	0.0195	0.1621	Other diseases of urinary system || id:finn-b-N14_URINOTH	0.07798	finn-b-N14_URINOTH
rs6580353	T	C	-0.0017	0.0131	0.8983	Other diseases of urinary system || id:finn-b-N14_URINOTH	0.2046	finn-b-N14_URINOTH
rs78753150	A	C	0.0081	0.0174	0.643501	Other diseases of urinary system || id:finn-b-N14_URINOTH	0.09952	finn-b-N14_URINOTH
rs62390301	T	C	0.0087	0.0131	0.5073	Other diseases of urinary system || id:finn-b-N14_URINOTH	0.1998	finn-b-N14_URINOTH
rs11685699	C	T	0.0229	0.0196	0.2431	Other diseases of urinary system || id:finn-b-N14_URINOTH	0.07786	finn-b-N14_URINOTH
rs1434153	G	A	-0.0046	0.0105	0.6642	Other diseases of urinary system || id:finn-b-N14_URINOTH	0.4436	finn-b-N14_URINOTH
rs2882478	G	A	-0.0018	0.0105	0.865	Other diseases of urinary system || id:finn-b-N14_URINOTH	0.5379	finn-b-N14_URINOTH
rs57404562	C	A	-0.0417	0.0156	0.00753095	Other diseases of urinary system || id:finn-b-N14_URINOTH	0.1287	finn-b-N14_URINOTH
rs1519491	T	C	-0.0004	0.0107	0.9731	Other diseases of urinary system || id:finn-b-N14_URINOTH	0.3972	finn-b-N14_URINOTH
rs11904514	A	G	0.0005	0.0217	0.981	Other diseases of urinary system || id:finn-b-N14_URINOTH	0.9376	finn-b-N14_URINOTH
rs114946999	C	T	-0.0024	0.0157	0.8777	Other diseases of urinary system || id:finn-b-N14_URINOTH	0.1261	finn-b-N14_URINOTH
rs7540303	C	T	-0.006	0.0108	0.5765	Other diseases of urinary system || id:finn-b-N14_URINOTH	0.3657	finn-b-N14_URINOTH
rs79476906	T	A	0.0049	0.0146	0.737199	Other diseases of urinary system || id:finn-b-N14_URINOTH	0.1506	finn-b-N14_URINOTH
rs66753613	G	A	0.0156	0.0135	0.2483	Other diseases of urinary system || id:finn-b-N14_URINOTH	0.1841	finn-b-N14_URINOTH
rs61779334	G	C	-0.0067	0.0176	0.704001	Other diseases of urinary system || id:finn-b-N14_URINOTH	0.09806	finn-b-N14_URINOTH
rs17376049	T	C	0.0278	0.0168	0.0976405	Other diseases of urinary system || id:finn-b-N14_URINOTH	0.1087	finn-b-N14_URINOTH
rs3008582	T	C	-0.0109	0.0133	0.4152	Other diseases of urinary system || id:finn-b-N14_URINOTH	0.195	finn-b-N14_URINOTH
rs74599091	A	G	-0.0142	0.0389	0.7142	Other diseases of urinary system || id:finn-b-N14_URINOTH	0.01852	finn-b-N14_URINOTH
rs10916131	C	T	0.0108	0.0142	0.4469	Other diseases of urinary system || id:finn-b-N14_URINOTH	0.1615	finn-b-N14_URINOTH
rs35961441	A	C	-0.0038	0.0274	0.8885	Other diseases of urinary system || id:finn-b-N14_URINOTH	0.03796	finn-b-N14_URINOTH
rs35362464	C	A	0.0199	0.015	0.1864	Other diseases of urinary system || id:finn-b-N14_URINOTH	0.1404	finn-b-N14_URINOTH
rs2973294	G	T	0.0024	0.0106	0.8174	Other diseases of urinary system || id:finn-b-N14_URINOTH	0.4142	finn-b-N14_URINOTH
rs62430350	T	C	-0.0172	0.028	0.5383	Other diseases of urinary system || id:finn-b-N14_URINOTH	0.03652	finn-b-N14_URINOTH
rs2820282	C	A	-0.0029	0.0107	0.787501	Other diseases of urinary system || id:finn-b-N14_URINOTH	0.5994	finn-b-N14_URINOTH
rs72756943	G	A	-0.0032	0.0212	0.8816	Other diseases of urinary system || id:finn-b-N14_URINOTH	0.06618	finn-b-N14_URINOTH
rs62353480	A	G	0.003	0.0139	0.8305	Other diseases of urinary system || id:finn-b-N14_URINOTH	0.1756	finn-b-N14_URINOTH
rs2731834	G	C	0.0034	0.0122	0.7815	Other diseases of urinary system || id:finn-b-N14_URINOTH	0.7595	finn-b-N14_URINOTH
rs1431492	C	T	-0.0047	0.0143	0.7424	Other diseases of urinary system || id:finn-b-N14_URINOTH	0.1573	finn-b-N14_URINOTH
rs1304512	G	A	0.002	0.0118	0.8636	Other diseases of urinary system || id:finn-b-N14_URINOTH	0.2716	finn-b-N14_URINOTH
rs3730086	A	G	0.0224	0.012	0.0632907	Other diseases of urinary system || id:finn-b-N14_URINOTH	0.2504	finn-b-N14_URINOTH
rs6856150	A	G	-0.0128	0.0159	0.4201	Other diseases of urinary system || id:finn-b-N14_URINOTH	0.8773	finn-b-N14_URINOTH
rs10805326	A	G	-0.027	0.0115	0.0187698	Other diseases of urinary system || id:finn-b-N14_URINOTH	0.706	finn-b-N14_URINOTH
rs12512971	A	C	0.0182	0.0194	0.3478	Other diseases of urinary system || id:finn-b-N14_URINOTH	0.07861	finn-b-N14_URINOTH
rs73232831	G	A	0.0194	0.0285	0.495801	Other diseases of urinary system || id:finn-b-N14_URINOTH	0.03484	finn-b-N14_URINOTH
rs1511453	A	G	0.0194	0.0223	0.3849	Other diseases of urinary system || id:finn-b-N14_URINOTH	0.05816	finn-b-N14_URINOTH
rs11720390	G	A	-0.0118	0.0217	0.5857	Other diseases of urinary system || id:finn-b-N14_URINOTH	0.06198	finn-b-N14_URINOTH
rs62251337	G	A	-0.0076	0.0149	0.611	Other diseases of urinary system || id:finn-b-N14_URINOTH	0.8584	finn-b-N14_URINOTH
rs78120384	A	G	-0.0061	0.0181	0.737901	Other diseases of urinary system || id:finn-b-N14_URINOTH	0.09274	finn-b-N14_URINOTH
rs712981	A	C	0.0223	0.0107	0.0376504	Other diseases of urinary system || id:finn-b-N14_URINOTH	0.3857	finn-b-N14_URINOTH
rs13086907	G	A	-0.0348	0.0126	0.005662	Other diseases of urinary system || id:finn-b-N14_URINOTH	0.2223	finn-b-N14_URINOTH
rs11715072	G	A	-0.0043	0.0114	0.7028	Other diseases of urinary system || id:finn-b-N14_URINOTH	0.3007	finn-b-N14_URINOTH
rs437876	T	C	0.0227	0.011	0.0380303	Other diseases of urinary system || id:finn-b-N14_URINOTH	0.3553	finn-b-N14_URINOTH
rs922773	C	T	0.0188	0.0172	0.276	Other diseases of urinary system || id:finn-b-N14_URINOTH	0.1013	finn-b-N14_URINOTH
rs13066142	G	A	-0.0055	0.0182	0.763901	Other diseases of urinary system || id:finn-b-N14_URINOTH	0.09082	finn-b-N14_URINOTH
rs4541991	T	C	-0.0124	0.0112	0.2664	Other diseases of urinary system || id:finn-b-N14_URINOTH	0.3239	finn-b-N14_URINOTH
rs1221147	A	T	-0.0206	0.0146	0.1581	Other diseases of urinary system || id:finn-b-N14_URINOTH	0.8487	finn-b-N14_URINOTH
rs59427698	A	G	-0.0225	0.0134	0.0926595	Other diseases of urinary system || id:finn-b-N14_URINOTH	0.1895	finn-b-N14_URINOTH
rs682403	A	G	0.0116	0.0104	0.2676	Other diseases of urinary system || id:finn-b-N14_URINOTH	0.5274	finn-b-N14_URINOTH
rs2428106	C	G	-0.0087	0.0106	0.4092	Other diseases of urinary system || id:finn-b-N14_URINOTH	0.4285	finn-b-N14_URINOTH
rs12417956	C	G	0.0096	0.0117	0.4097	Other diseases of urinary system || id:finn-b-N14_URINOTH	0.2753	finn-b-N14_URINOTH
rs34962571	A	C	-0.0127	0.0175	0.4678	Other diseases of urinary system || id:finn-b-N14_URINOTH	0.1011	finn-b-N14_URINOTH
rs9788306	C	T	-0.0095	0.0116	0.4126	Other diseases of urinary system || id:finn-b-N14_URINOTH	0.2877	finn-b-N14_URINOTH
rs2031282	A	G	-0.0037	0.0138	0.79	Other diseases of urinary system || id:finn-b-N14_URINOTH	0.184	finn-b-N14_URINOTH
rs17109926	A	G	-0.0035	0.0118	0.7687	Other diseases of urinary system || id:finn-b-N14_URINOTH	0.2716	finn-b-N14_URINOTH
rs9603208	G	T	-0.0005	0.0173	0.9787	Other diseases of urinary system || id:finn-b-N14_URINOTH	0.1006	finn-b-N14_URINOTH
rs1107244	G	A	-0.0023	0.0194	0.9065	Other diseases of urinary system || id:finn-b-N14_URINOTH	0.07827	finn-b-N14_URINOTH
rs79535861	A	C	-0.0156	0.0181	0.3901	Other diseases of urinary system || id:finn-b-N14_URINOTH	0.09146	finn-b-N14_URINOTH
rs7334707	G	T	-0.0187	0.024	0.4376	Other diseases of urinary system || id:finn-b-N14_URINOTH	0.9503	finn-b-N14_URINOTH
rs9578457	G	A	0.0158	0.0243	0.5164	Other diseases of urinary system || id:finn-b-N14_URINOTH	0.04824	finn-b-N14_URINOTH
rs7993559	A	C	-0.0178	0.0106	0.0942801	Other diseases of urinary system || id:finn-b-N14_URINOTH	0.5544	finn-b-N14_URINOTH
rs9534068	A	G	-0.0042	0.0108	0.6937	Other diseases of urinary system || id:finn-b-N14_URINOTH	0.3834	finn-b-N14_URINOTH
rs6489992	A	G	-0.0028	0.0108	0.7963	Other diseases of urinary system || id:finn-b-N14_URINOTH	0.3717	finn-b-N14_URINOTH
rs2880566	T	C	0.0071	0.0147	0.6296	Other diseases of urinary system || id:finn-b-N14_URINOTH	0.1488	finn-b-N14_URINOTH
rs1864685	A	C	0.0146	0.0106	0.1676	Other diseases of urinary system || id:finn-b-N14_URINOTH	0.4065	finn-b-N14_URINOTH
rs7269302	A	T	0.0176	0.0219	0.4224	Other diseases of urinary system || id:finn-b-N14_URINOTH	0.06024	finn-b-N14_URINOTH
rs6116753	G	A	-0.0227	0.0136	0.0952401	Other diseases of urinary system || id:finn-b-N14_URINOTH	0.1778	finn-b-N14_URINOTH
rs731534	C	G	0.0337	0.0166	0.0425902	Other diseases of urinary system || id:finn-b-N14_URINOTH	0.112	finn-b-N14_URINOTH
rs6112314	A	C	0.0046	0.0111	0.677901	Other diseases of urinary system || id:finn-b-N14_URINOTH	0.3316	finn-b-N14_URINOTH
rs6071435	T	A	0.0006	0.0108	0.9575	Other diseases of urinary system || id:finn-b-N14_URINOTH	0.3741	finn-b-N14_URINOTH
rs62200412	C	T	0.0097	0.012	0.4224	Other diseases of urinary system || id:finn-b-N14_URINOTH	0.2622	finn-b-N14_URINOTH
rs2223081	A	G	0.012	0.0116	0.3037	Other diseases of urinary system || id:finn-b-N14_URINOTH	0.7159	finn-b-N14_URINOTH
rs2833528	T	C	-0.0008	0.0108	0.9433	Other diseases of urinary system || id:finn-b-N14_URINOTH	0.6259	finn-b-N14_URINOTH
rs79968837	A	G	-0.0001	0.0237	0.9962	Other diseases of urinary system || id:finn-b-N14_URINOTH	0.05051	finn-b-N14_URINOTH
rs4810359	A	G	-0.0038	0.0159	0.8122	Other diseases of urinary system || id:finn-b-N14_URINOTH	0.1226	finn-b-N14_URINOTH
rs4078432	T	C	0.0035	0.0139	0.8023	Other diseases of urinary system || id:finn-b-N14_URINOTH	0.827	finn-b-N14_URINOTH
rs73103914	A	G	0.0106	0.0146	0.4661	Other diseases of urinary system || id:finn-b-N14_URINOTH	0.1502	finn-b-N14_URINOTH
rs2336448	T	C	-0.0104	0.0104	0.3203	Other diseases of urinary system || id:finn-b-N14_URINOTH	0.4836	finn-b-N14_URINOTH
rs2321387	G	A	0.0001	0.0105	0.9932	Other diseases of urinary system || id:finn-b-N14_URINOTH	0.4305	finn-b-N14_URINOTH
rs9541268	C	A	-0.0016	0.0181	0.9284	Other diseases of urinary system || id:finn-b-N14_URINOTH	0.0903	finn-b-N14_URINOTH
rs77885767	C	T	-0.0391	0.0249	0.1161	Other diseases of urinary system || id:finn-b-N14_URINOTH	0.04604	finn-b-N14_URINOTH
rs158115	G	C	0.0096	0.0156	0.540201	Other diseases of urinary system || id:finn-b-N14_URINOTH	0.1288	finn-b-N14_URINOTH
rs28417404	A	G	-0.0119	0.0176	0.4998	Other diseases of urinary system || id:finn-b-N14_URINOTH	0.09641	finn-b-N14_URINOTH
rs1384962	G	A	-0.0002	0.0112	0.9877	Other diseases of urinary system || id:finn-b-N14_URINOTH	0.6778	finn-b-N14_URINOTH
rs61973590	C	G	-0.0057	0.011	0.601999	Other diseases of urinary system || id:finn-b-N14_URINOTH	0.3568	finn-b-N14_URINOTH
rs74315802	G	T	-0.0136	0.0137	0.3227	Other diseases of urinary system || id:finn-b-N14_URINOTH	0.1836	finn-b-N14_URINOTH
rs17096874	C	T	0.0148	0.0128	0.2471	Other diseases of urinary system || id:finn-b-N14_URINOTH	0.2115	finn-b-N14_URINOTH
rs77702691	A	G	0.0005	0.0185	0.9774	Other diseases of urinary system || id:finn-b-N14_URINOTH	0.089	finn-b-N14_URINOTH
rs7234058	T	C	0.0084	0.0182	0.644	Other diseases of urinary system || id:finn-b-N14_URINOTH	0.09048	finn-b-N14_URINOTH
rs2385421	A	G	0.0099	0.0162	0.5406	Other diseases of urinary system || id:finn-b-N14_URINOTH	0.1192	finn-b-N14_URINOTH
rs12458218	T	C	0.0411	0.0135	0.002398	Other diseases of urinary system || id:finn-b-N14_URINOTH	0.1801	finn-b-N14_URINOTH
rs4629039	A	T	0.0119	0.0107	0.2691	Other diseases of urinary system || id:finn-b-N14_URINOTH	0.6156	finn-b-N14_URINOTH
rs62130338	A	G	0.0034	0.011	0.757201	Other diseases of urinary system || id:finn-b-N14_URINOTH	0.6553	finn-b-N14_URINOTH
rs2548459	C	T	-0.0116	0.0106	0.2723	Other diseases of urinary system || id:finn-b-N14_URINOTH	0.4097	finn-b-N14_URINOTH
rs62132810	A	G	-0.0118	0.0151	0.4317	Other diseases of urinary system || id:finn-b-N14_URINOTH	0.1442	finn-b-N14_URINOTH
rs72991535	T	G	0.0318	0.0284	0.2643	Other diseases of urinary system || id:finn-b-N14_URINOTH	0.03551	finn-b-N14_URINOTH
rs672217	G	A	-0.0148	0.0131	0.2578	Other diseases of urinary system || id:finn-b-N14_URINOTH	0.1985	finn-b-N14_URINOTH
rs7237249	C	T	0.0152	0.0133	0.2557	Other diseases of urinary system || id:finn-b-N14_URINOTH	0.1882	finn-b-N14_URINOTH
rs1908593	T	C	0.0081	0.0106	0.4478	Other diseases of urinary system || id:finn-b-N14_URINOTH	0.5593	finn-b-N14_URINOTH
rs75819860	T	A	0.0021	0.0169	0.9002	Other diseases of urinary system || id:finn-b-N14_URINOTH	0.1146	finn-b-N14_URINOTH
rs149807560	C	A	-0.0443	0.0206	0.0317402	Other diseases of urinary system || id:finn-b-N14_URINOTH	0.06897	finn-b-N14_URINOTH
rs504442	T	G	-0.0033	0.0171	0.847	Other diseases of urinary system || id:finn-b-N14_URINOTH	0.1049	finn-b-N14_URINOTH
rs2074881	T	C	-0.037	0.0155	0.01685	Other diseases of urinary system || id:finn-b-N14_URINOTH	0.132	finn-b-N14_URINOTH
rs10409783	G	A	-0.0092	0.0116	0.4305	Other diseases of urinary system || id:finn-b-N14_URINOTH	0.7099	finn-b-N14_URINOTH
rs12980122	C	G	-0.0536	0.0201	0.00774908	Other diseases of urinary system || id:finn-b-N14_URINOTH	0.07533	finn-b-N14_URINOTH
rs12977163	G	C	-0.0252	0.0107	0.0189802	Other diseases of urinary system || id:finn-b-N14_URINOTH	0.3901	finn-b-N14_URINOTH
rs112040820	A	G	0.0018	0.0119	0.8792	Other diseases of urinary system || id:finn-b-N14_URINOTH	0.2612	finn-b-N14_URINOTH
rs4583233	A	C	-0.0044	0.0116	0.7061	Other diseases of urinary system || id:finn-b-N14_URINOTH	0.2879	finn-b-N14_URINOTH
rs147968	C	T	0.0032	0.0104	0.7602	Other diseases of urinary system || id:finn-b-N14_URINOTH	0.4612	finn-b-N14_URINOTH
rs7187855	A	C	0.0294	0.0251	0.2427	Other diseases of urinary system || id:finn-b-N14_URINOTH	0.04518	finn-b-N14_URINOTH
rs116979587	T	A	0.0073	0.0243	0.7637	Other diseases of urinary system || id:finn-b-N14_URINOTH	0.04871	finn-b-N14_URINOTH
rs11071887	T	C	0.0159	0.0112	0.1558	Other diseases of urinary system || id:finn-b-N14_URINOTH	0.3242	finn-b-N14_URINOTH
rs16959793	A	C	0.0145	0.0106	0.1714	Other diseases of urinary system || id:finn-b-N14_URINOTH	0.4145	finn-b-N14_URINOTH
rs2683098	T	C	0.0094	0.0127	0.4585	Other diseases of urinary system || id:finn-b-N14_URINOTH	0.7833	finn-b-N14_URINOTH
rs12906958	C	T	-0.0024	0.0115	0.8337	Other diseases of urinary system || id:finn-b-N14_URINOTH	0.2921	finn-b-N14_URINOTH
rs1850003	A	G	-0.0045	0.0124	0.713199	Other diseases of urinary system || id:finn-b-N14_URINOTH	0.2319	finn-b-N14_URINOTH
rs28480294	C	T	-0.0001	0.011	0.995	Other diseases of urinary system || id:finn-b-N14_URINOTH	0.6428	finn-b-N14_URINOTH
rs4327025	G	A	-0.0028	0.0134	0.8373	Other diseases of urinary system || id:finn-b-N14_URINOTH	0.1857	finn-b-N14_URINOTH
rs12908520	G	A	-0.0041	0.0105	0.6955	Other diseases of urinary system || id:finn-b-N14_URINOTH	0.4263	finn-b-N14_URINOTH
rs2585223	T	C	0.0438	0.0159	0.00577006	Other diseases of urinary system || id:finn-b-N14_URINOTH	0.1229	finn-b-N14_URINOTH
rs75499067	C	T	0.0079	0.0199	0.69	Other diseases of urinary system || id:finn-b-N14_URINOTH	0.07511	finn-b-N14_URINOTH
rs2930225	T	G	0.005	0.0124	0.6856	Other diseases of urinary system || id:finn-b-N14_URINOTH	0.7671	finn-b-N14_URINOTH
rs111582866	G	A	0.0265	0.0186	0.1545	Other diseases of urinary system || id:finn-b-N14_URINOTH	0.08687	finn-b-N14_URINOTH
rs8028026	G	A	-0.0161	0.0181	0.374	Other diseases of urinary system || id:finn-b-N14_URINOTH	0.9075	finn-b-N14_URINOTH
rs2715439	T	C	0.0113	0.0104	0.2783	Other diseases of urinary system || id:finn-b-N14_URINOTH	0.5285	finn-b-N14_URINOTH
rs139749	C	T	-0.0035	0.0111	0.754899	Other diseases of urinary system || id:finn-b-N14_URINOTH	0.3419	finn-b-N14_URINOTH
rs5994253	A	G	0.0144	0.015	0.3372	Other diseases of urinary system || id:finn-b-N14_URINOTH	0.1419	finn-b-N14_URINOTH
rs720439	G	A	-0.0007	0.0122	0.9565	Other diseases of urinary system || id:finn-b-N14_URINOTH	0.7529	finn-b-N14_URINOTH
rs881532	G	A	-0.0082	0.0104	0.4288	Other diseases of urinary system || id:finn-b-N14_URINOTH	0.5049	finn-b-N14_URINOTH
rs8010111	A	G	-0.0238	0.019	0.2122	Other diseases of urinary system || id:finn-b-N14_URINOTH	0.9193	finn-b-N14_URINOTH
rs41438744	C	G	-0.0514	0.0191	0.00723402	Other diseases of urinary system || id:finn-b-N14_URINOTH	0.08173	finn-b-N14_URINOTH
rs4383094	C	T	-0.0121	0.0151	0.4218	Other diseases of urinary system || id:finn-b-N14_URINOTH	0.8578	finn-b-N14_URINOTH
rs1576241	A	G	0.0274	0.0107	0.01086	Other diseases of urinary system || id:finn-b-N14_URINOTH	0.3807	finn-b-N14_URINOTH
rs4708333	T	G	0.0003	0.011	0.9807	Other diseases of urinary system || id:finn-b-N14_URINOTH	0.3406	finn-b-N14_URINOTH
rs584122	T	C	-0.0276	0.0222	0.2142	Other diseases of urinary system || id:finn-b-N14_URINOTH	0.9408	finn-b-N14_URINOTH
rs10071529	C	G	-0.001	0.0168	0.9515	Other diseases of urinary system || id:finn-b-N14_URINOTH	0.8902	finn-b-N14_URINOTH
rs11958296	A	G	-0.023	0.0254	0.3644	Other diseases of urinary system || id:finn-b-N14_URINOTH	0.04465	finn-b-N14_URINOTH
rs79795896	A	G	0.0264	0.0248	0.2865	Other diseases of urinary system || id:finn-b-N14_URINOTH	0.04669	finn-b-N14_URINOTH
rs2833828	G	A	-0.0158	0.0106	0.136	Other diseases of urinary system || id:finn-b-N14_URINOTH	0.4119	finn-b-N14_URINOTH
rs2834977	T	C	-0.0133	0.0145	0.3586	Other diseases of urinary system || id:finn-b-N14_URINOTH	0.1519	finn-b-N14_URINOTH
rs4945008	G	A	-0.0097	0.0107	0.3662	Other diseases of urinary system || id:finn-b-N14_URINOTH	0.608	finn-b-N14_URINOTH
rs6062862	A	G	0.001	0.0189	0.9568	Other diseases of urinary system || id:finn-b-N14_URINOTH	0.08298	finn-b-N14_URINOTH
rs67561917	A	G	0.0066	0.0136	0.6262	Other diseases of urinary system || id:finn-b-N14_URINOTH	0.1825	finn-b-N14_URINOTH
rs992074	T	C	0.0049	0.035	0.8894	Other diseases of urinary system || id:finn-b-N14_URINOTH	0.977	finn-b-N14_URINOTH
rs1999289	A	T	0.0037	0.0125	0.765399	Other diseases of urinary system || id:finn-b-N14_URINOTH	0.2409	finn-b-N14_URINOTH
rs12673420	G	A	0.0113	0.0104	0.2803	Other diseases of urinary system || id:finn-b-N14_URINOTH	0.499	finn-b-N14_URINOTH
rs1264476	G	T	0.0117	0.0134	0.3829	Other diseases of urinary system || id:finn-b-N14_URINOTH	0.8134	finn-b-N14_URINOTH
rs11979110	T	C	-0.0055	0.0105	0.596	Other diseases of urinary system || id:finn-b-N14_URINOTH	0.4637	finn-b-N14_URINOTH
rs74303178	T	C	-0.0024	0.0112	0.8336	Other diseases of urinary system || id:finn-b-N14_URINOTH	0.3168	finn-b-N14_URINOTH
rs3758087	C	T	-0.0058	0.0117	0.6183	Other diseases of urinary system || id:finn-b-N14_URINOTH	0.7234	finn-b-N14_URINOTH
rs11990279	T	C	0.0105	0.0149	0.4809	Other diseases of urinary system || id:finn-b-N14_URINOTH	0.1998	finn-b-N14_URINOTH
rs139730	G	C	-0.0034	0.0122	0.778599	Other diseases of urinary system || id:finn-b-N14_URINOTH	0.253	finn-b-N14_URINOTH
rs4822728	T	C	-0.0053	0.0104	0.6142	Other diseases of urinary system || id:finn-b-N14_URINOTH	0.4833	finn-b-N14_URINOTH
rs17105491	G	C	0.0283	0.0217	0.1918	Other diseases of urinary system || id:finn-b-N14_URINOTH	0.06157	finn-b-N14_URINOTH
rs80149660	C	T	-0.0205	0.0254	0.4211	Other diseases of urinary system || id:finn-b-N14_URINOTH	0.04384	finn-b-N14_URINOTH
rs55877868	A	C	0.0169	0.0173	0.3307	Other diseases of urinary system || id:finn-b-N14_URINOTH	0.1009	finn-b-N14_URINOTH
rs12452946	A	G	0.0056	0.0104	0.5895	Other diseases of urinary system || id:finn-b-N14_URINOTH	0.4978	finn-b-N14_URINOTH
rs1550196	A	G	0.0138	0.0175	0.4279	Other diseases of urinary system || id:finn-b-N14_URINOTH	0.9004	finn-b-N14_URINOTH
rs112362903	A	G	0.0101	0.0285	0.723299	Other diseases of urinary system || id:finn-b-N14_URINOTH	0.0343	finn-b-N14_URINOTH
rs1467258	G	A	-0.0107	0.0135	0.4263	Other diseases of urinary system || id:finn-b-N14_URINOTH	0.1878	finn-b-N14_URINOTH
rs8901	C	T	0.0096	0.0114	0.4005	Other diseases of urinary system || id:finn-b-N14_URINOTH	0.2936	finn-b-N14_URINOTH
rs8076666	G	A	-0.0227	0.016	0.1568	Other diseases of urinary system || id:finn-b-N14_URINOTH	0.8803	finn-b-N14_URINOTH
rs2907920	G	A	-0.0255	0.0116	0.0280098	Other diseases of urinary system || id:finn-b-N14_URINOTH	0.7155	finn-b-N14_URINOTH
rs1496626	T	C	-0.0252	0.0153	0.0996391	Other diseases of urinary system || id:finn-b-N14_URINOTH	0.1345	finn-b-N14_URINOTH
rs1693340	T	C	0.008	0.0203	0.6944	Other diseases of urinary system || id:finn-b-N14_URINOTH	0.07214	finn-b-N14_URINOTH
rs17084793	G	A	-0.0199	0.0148	0.1793	Other diseases of urinary system || id:finn-b-N14_URINOTH	0.1463	finn-b-N14_URINOTH
rs10873449	C	T	-0.0051	0.0133	0.6979	Other diseases of urinary system || id:finn-b-N14_URINOTH	0.8076	finn-b-N14_URINOTH
rs911666	T	C	0.001	0.0113	0.927	Other diseases of urinary system || id:finn-b-N14_URINOTH	0.3031	finn-b-N14_URINOTH
rs61508842	T	C	0.0239	0.0184	0.1941	Other diseases of urinary system || id:finn-b-N14_URINOTH	0.08763	finn-b-N14_URINOTH
rs62273907	A	G	-0.0028	0.0209	0.8913	Other diseases of urinary system || id:finn-b-N14_URINOTH	0.06733	finn-b-N14_URINOTH
rs609430	T	G	0.0118	0.0109	0.2815	Other diseases of urinary system || id:finn-b-N14_URINOTH	0.3497	finn-b-N14_URINOTH
rs4692811	C	T	0.0208	0.011	0.0596898	Other diseases of urinary system || id:finn-b-N14_URINOTH	0.3408	finn-b-N14_URINOTH
rs9313055	T	C	-0.0171	0.0191	0.3709	Other diseases of urinary system || id:finn-b-N14_URINOTH	0.08106	finn-b-N14_URINOTH
rs78572139	G	A	0.0046	0.0174	0.793	Other diseases of urinary system || id:finn-b-N14_URINOTH	0.102	finn-b-N14_URINOTH
rs10031059	C	T	0.0071	0.0123	0.5636	Other diseases of urinary system || id:finn-b-N14_URINOTH	0.7648	finn-b-N14_URINOTH
rs11736617	G	A	-0.0119	0.0229	0.6026	Other diseases of urinary system || id:finn-b-N14_URINOTH	0.05546	finn-b-N14_URINOTH
rs12500231	T	A	-0.0122	0.0105	0.2443	Other diseases of urinary system || id:finn-b-N14_URINOTH	0.5156	finn-b-N14_URINOTH
rs13128780	T	C	-0.0028	0.0133	0.8317	Other diseases of urinary system || id:finn-b-N14_URINOTH	0.1879	finn-b-N14_URINOTH
rs11745923	G	T	-0.0182	0.0107	0.0887197	Other diseases of urinary system || id:finn-b-N14_URINOTH	0.3934	finn-b-N14_URINOTH
rs34088226	A	G	-0.0321	0.0225	0.1537	Other diseases of urinary system || id:finn-b-N14_URINOTH	0.05842	finn-b-N14_URINOTH
rs149302	T	C	-0.0021	0.0124	0.8644	Other diseases of urinary system || id:finn-b-N14_URINOTH	0.2324	finn-b-N14_URINOTH
rs13163520	G	A	0.0021	0.0135	0.8739	Other diseases of urinary system || id:finn-b-N14_URINOTH	0.1837	finn-b-N14_URINOTH
rs3761728	G	T	-0.0001	0.012	0.991	Other diseases of urinary system || id:finn-b-N14_URINOTH	0.7478	finn-b-N14_URINOTH
rs6837275	A	G	-0.0088	0.0114	0.4408	Other diseases of urinary system || id:finn-b-N14_URINOTH	0.3008	finn-b-N14_URINOTH
rs2585520	G	T	0.0157	0.0272	0.5638	Other diseases of urinary system || id:finn-b-N14_URINOTH	0.03829	finn-b-N14_URINOTH
rs61972390	T	C	0.0195	0.0154	0.2035	Other diseases of urinary system || id:finn-b-N14_URINOTH	0.1371	finn-b-N14_URINOTH
rs75356640	G	A	0.0058	0.0159	0.7135	Other diseases of urinary system || id:finn-b-N14_URINOTH	0.1244	finn-b-N14_URINOTH
rs75242906	C	T	0.0075	0.019	0.6934	Other diseases of urinary system || id:finn-b-N14_URINOTH	0.08375	finn-b-N14_URINOTH
rs11637981	T	G	-0.0016	0.0105	0.8783	Other diseases of urinary system || id:finn-b-N14_URINOTH	0.443	finn-b-N14_URINOTH
rs9929145	G	A	0.0345	0.0242	0.1534	Other diseases of urinary system || id:finn-b-N14_URINOTH	0.04914	finn-b-N14_URINOTH
rs2012708	G	A	-0.0113	0.011	0.3031	Other diseases of urinary system || id:finn-b-N14_URINOTH	0.6562	finn-b-N14_URINOTH
rs9938097	C	T	-0.0166	0.0107	0.122	Other diseases of urinary system || id:finn-b-N14_URINOTH	0.611	finn-b-N14_URINOTH
rs4779844	C	G	-0.0088	0.011	0.4228	Other diseases of urinary system || id:finn-b-N14_URINOTH	0.6546	finn-b-N14_URINOTH
rs4784055	T	C	-0.0625	0.0239	0.00886707	Other diseases of urinary system || id:finn-b-N14_URINOTH	0.05018	finn-b-N14_URINOTH
rs6563952	C	G	-0.0348	0.0181	0.05434	Other diseases of urinary system || id:finn-b-N14_URINOTH	0.908	finn-b-N14_URINOTH
rs13336560	C	T	0.0091	0.0107	0.3947	Other diseases of urinary system || id:finn-b-N14_URINOTH	0.5446	finn-b-N14_URINOTH
rs9899990	A	G	-0.0079	0.0189	0.6753	Other diseases of urinary system || id:finn-b-N14_URINOTH	0.08447	finn-b-N14_URINOTH
rs4076415	G	T	-0.01	0.0109	0.3565	Other diseases of urinary system || id:finn-b-N14_URINOTH	0.6307	finn-b-N14_URINOTH
rs11642826	G	C	0.0342	0.0181	0.0588898	Other diseases of urinary system || id:finn-b-N14_URINOTH	0.09219	finn-b-N14_URINOTH
rs2034589	G	C	0.0039	0.0137	0.7782	Other diseases of urinary system || id:finn-b-N14_URINOTH	0.1782	finn-b-N14_URINOTH
rs12050685	A	G	-0.0011	0.0116	0.9263	Other diseases of urinary system || id:finn-b-N14_URINOTH	0.2804	finn-b-N14_URINOTH
rs1729063	C	G	0.0103	0.011	0.3501	Other diseases of urinary system || id:finn-b-N14_URINOTH	0.6488	finn-b-N14_URINOTH
rs4968431	G	T	0.0038	0.011	0.7295	Other diseases of urinary system || id:finn-b-N14_URINOTH	0.3664	finn-b-N14_URINOTH
rs11126162	T	C	-0.0212	0.0189	0.2628	Other diseases of urinary system || id:finn-b-N14_URINOTH	0.083	finn-b-N14_URINOTH
rs11684166	A	G	0.0053	0.0137	0.7002	Other diseases of urinary system || id:finn-b-N14_URINOTH	0.1775	finn-b-N14_URINOTH
rs73052258	G	A	-0.0086	0.0196	0.6599	Other diseases of urinary system || id:finn-b-N14_URINOTH	0.0769	finn-b-N14_URINOTH
rs166849	A	G	-0.016	0.0106	0.1315	Other diseases of urinary system || id:finn-b-N14_URINOTH	0.5861	finn-b-N14_URINOTH
rs17734739	T	C	0.0164	0.015	0.2721	Other diseases of urinary system || id:finn-b-N14_URINOTH	0.1409	finn-b-N14_URINOTH
rs62277846	C	T	0.0108	0.0132	0.414	Other diseases of urinary system || id:finn-b-N14_URINOTH	0.1923	finn-b-N14_URINOTH
rs13394391	C	T	-0.0055	0.0144	0.703301	Other diseases of urinary system || id:finn-b-N14_URINOTH	0.1538	finn-b-N14_URINOTH
rs2113833	C	T	0.0201	0.0293	0.4925	Other diseases of urinary system || id:finn-b-N14_URINOTH	0.9673	finn-b-N14_URINOTH
rs72839198	C	G	0.0055	0.0181	0.7602	Other diseases of urinary system || id:finn-b-N14_URINOTH	0.0919	finn-b-N14_URINOTH
rs13033315	T	A	0.0258	0.0112	0.02082	Other diseases of urinary system || id:finn-b-N14_URINOTH	0.3195	finn-b-N14_URINOTH
rs114244418	C	G	-0.0413	0.0265	0.1185	Other diseases of urinary system || id:finn-b-N14_URINOTH	0.04033	finn-b-N14_URINOTH
rs3754624	C	T	-0.005	0.0136	0.713801	Other diseases of urinary system || id:finn-b-N14_URINOTH	0.1769	finn-b-N14_URINOTH
rs60081663	C	G	-0.0124	0.0299	0.6789	Other diseases of urinary system || id:finn-b-N14_URINOTH	0.03125	finn-b-N14_URINOTH
rs10070053	A	G	-0.0158	0.0106	0.1364	Other diseases of urinary system || id:finn-b-N14_URINOTH	0.4147	finn-b-N14_URINOTH
rs40656	C	T	0.0237	0.0131	0.0698795	Other diseases of urinary system || id:finn-b-N14_URINOTH	0.2059	finn-b-N14_URINOTH
rs17163238	G	A	-0.005	0.0132	0.7053	Other diseases of urinary system || id:finn-b-N14_URINOTH	0.1915	finn-b-N14_URINOTH
rs199035	G	A	0.0023	0.0105	0.8244	Other diseases of urinary system || id:finn-b-N14_URINOTH	0.5552	finn-b-N14_URINOTH
rs9349693	G	A	-0.0082	0.0115	0.4765	Other diseases of urinary system || id:finn-b-N14_URINOTH	0.7086	finn-b-N14_URINOTH
rs3800154	A	C	-0.0086	0.0119	0.4704	Other diseases of urinary system || id:finn-b-N14_URINOTH	0.2645	finn-b-N14_URINOTH
rs607782	C	T	-0.009	0.0108	0.4054	Other diseases of urinary system || id:finn-b-N14_URINOTH	0.6076	finn-b-N14_URINOTH
rs6923842	T	C	0.0028	0.0164	0.8632	Other diseases of urinary system || id:finn-b-N14_URINOTH	0.116	finn-b-N14_URINOTH
rs114873521	C	T	-0.0193	0.0204	0.3427	Other diseases of urinary system || id:finn-b-N14_URINOTH	0.07319	finn-b-N14_URINOTH
rs395407	C	G	0.0102	0.0145	0.480799	Other diseases of urinary system || id:finn-b-N14_URINOTH	0.8335	finn-b-N14_URINOTH
rs12186441	G	A	-0.0203	0.0261	0.4372	Other diseases of urinary system || id:finn-b-N14_URINOTH	0.04207	finn-b-N14_URINOTH
rs12189346	G	A	0.0134	0.0134	0.3154	Other diseases of urinary system || id:finn-b-N14_URINOTH	0.1868	finn-b-N14_URINOTH
rs12679709	C	G	0.0141	0.0109	0.1957	Other diseases of urinary system || id:finn-b-N14_URINOTH	0.3514	finn-b-N14_URINOTH
rs13249325	T	G	0.0048	0.0105	0.6438	Other diseases of urinary system || id:finn-b-N14_URINOTH	0.4689	finn-b-N14_URINOTH
rs2172426	T	C	-0.0045	0.0106	0.6703	Other diseases of urinary system || id:finn-b-N14_URINOTH	0.5961	finn-b-N14_URINOTH
rs2450745	A	C	-0.0144	0.0205	0.484299	Other diseases of urinary system || id:finn-b-N14_URINOTH	0.06914	finn-b-N14_URINOTH
rs60884758	C	T	0.0295	0.0136	0.03071	Other diseases of urinary system || id:finn-b-N14_URINOTH	0.1783	finn-b-N14_URINOTH
rs56199908	T	C	-0.0512	0.0235	0.0291998	Other diseases of urinary system || id:finn-b-N14_URINOTH	0.05236	finn-b-N14_URINOTH
rs10976229	T	G	0.0102	0.0155	0.5121	Other diseases of urinary system || id:finn-b-N14_URINOTH	0.1294	finn-b-N14_URINOTH
rs12377846	C	A	0.0405	0.031	0.1915	Other diseases of urinary system || id:finn-b-N14_URINOTH	0.0286	finn-b-N14_URINOTH
rs60178956	G	A	-0.0013	0.0125	0.9186	Other diseases of urinary system || id:finn-b-N14_URINOTH	0.2264	finn-b-N14_URINOTH
rs2317372	T	C	-0.0087	0.0107	0.4175	Other diseases of urinary system || id:finn-b-N14_URINOTH	0.6132	finn-b-N14_URINOTH
rs74553962	T	G	0.0052	0.0199	0.792301	Other diseases of urinary system || id:finn-b-N14_URINOTH	0.07616	finn-b-N14_URINOTH
rs10093275	T	C	0.0058	0.0111	0.6003	Other diseases of urinary system || id:finn-b-N14_URINOTH	0.6688	finn-b-N14_URINOTH
rs11783695	G	T	-0.0034	0.0143	0.8126	Other diseases of urinary system || id:finn-b-N14_URINOTH	0.1592	finn-b-N14_URINOTH
rs113884518	T	C	-0.0082	0.034	0.809	Other diseases of urinary system || id:finn-b-N14_URINOTH	0.02417	finn-b-N14_URINOTH
rs10119172	C	G	0.0332	0.0137	0.0151499	Other diseases of urinary system || id:finn-b-N14_URINOTH	0.1777	finn-b-N14_URINOTH
rs606117	G	A	-0.0105	0.0118	0.3719	Other diseases of urinary system || id:finn-b-N14_URINOTH	0.7297	finn-b-N14_URINOTH
rs62568866	T	A	-0.0215	0.0169	0.2034	Other diseases of urinary system || id:finn-b-N14_URINOTH	0.1066	finn-b-N14_URINOTH
rs72691585	C	A	0.0075	0.0153	0.6264	Other diseases of urinary system || id:finn-b-N14_URINOTH	0.1339	finn-b-N14_URINOTH
rs113893692	C	T	-0.0292	0.016	0.0672806	Other diseases of urinary system || id:finn-b-N14_URINOTH	0.1237	finn-b-N14_URINOTH
rs10098492	T	C	0.01	0.0224	0.654201	Other diseases of urinary system || id:finn-b-N14_URINOTH	0.05722	finn-b-N14_URINOTH
rs16884680	G	T	0.006	0.0171	0.724201	Other diseases of urinary system || id:finn-b-N14_URINOTH	0.1044	finn-b-N14_URINOTH
rs6993398	G	A	-0.0015	0.0135	0.9142	Other diseases of urinary system || id:finn-b-N14_URINOTH	0.1829	finn-b-N14_URINOTH
rs212393	A	G	-0.0109	0.0129	0.3995	Other diseases of urinary system || id:finn-b-N14_URINOTH	0.7928	finn-b-N14_URINOTH
rs2713349	T	A	0.0215	0.0115	0.0605397	Other diseases of urinary system || id:finn-b-N14_URINOTH	0.703	finn-b-N14_URINOTH
rs6934739	A	G	-0.0151	0.0111	0.1739	Other diseases of urinary system || id:finn-b-N14_URINOTH	0.3326	finn-b-N14_URINOTH
rs4236095	A	G	-0.0173	0.0173	0.3156	Other diseases of urinary system || id:finn-b-N14_URINOTH	0.8969	finn-b-N14_URINOTH
rs1475330	C	T	-0.0002	0.0123	0.9867	Other diseases of urinary system || id:finn-b-N14_URINOTH	0.7607	finn-b-N14_URINOTH
rs12195431	T	C	-0.0035	0.0178	0.8458	Other diseases of urinary system || id:finn-b-N14_URINOTH	0.0974	finn-b-N14_URINOTH
rs12528285	C	T	0.0135	0.0167	0.4201	Other diseases of urinary system || id:finn-b-N14_URINOTH	0.1093	finn-b-N14_URINOTH
rs761624	G	C	0.0153	0.0114	0.1777	Other diseases of urinary system || id:finn-b-N14_URINOTH	0.6986	finn-b-N14_URINOTH
rs6934062	G	C	-0.033	0.0112	0.003159	Other diseases of urinary system || id:finn-b-N14_URINOTH	0.3174	finn-b-N14_URINOTH
rs73068003	G	T	-0.0013	0.0177	0.942	Other diseases of urinary system || id:finn-b-N14_URINOTH	0.09613	finn-b-N14_URINOTH
rs1830029	G	C	-0.028	0.0125	0.02537	Other diseases of urinary system || id:finn-b-N14_URINOTH	0.7731	finn-b-N14_URINOTH
rs9648214	T	C	0.0345	0.0186	0.06267	Other diseases of urinary system || id:finn-b-N14_URINOTH	0.08647	finn-b-N14_URINOTH
rs768830	A	G	-0.0091	0.0144	0.5269	Other diseases of urinary system || id:finn-b-N14_URINOTH	0.8439	finn-b-N14_URINOTH
rs4722181	T	G	-0.0161	0.0104	0.1236	Other diseases of urinary system || id:finn-b-N14_URINOTH	0.4715	finn-b-N14_URINOTH
rs9500080	C	T	-0.026	0.0139	0.0609397	Other diseases of urinary system || id:finn-b-N14_URINOTH	0.171	finn-b-N14_URINOTH
rs2428166	G	A	0.0304	0.0442	0.4914	Other diseases of urinary system || id:finn-b-N14_URINOTH	0.01426	finn-b-N14_URINOTH
rs7752361	G	A	0.0013	0.0104	0.9026	Other diseases of urinary system || id:finn-b-N14_URINOTH	0.5175	finn-b-N14_URINOTH
rs76531781	T	C	0.0445	0.0266	0.0942606	Other diseases of urinary system || id:finn-b-N14_URINOTH	0.04002	finn-b-N14_URINOTH
rs75326254	C	T	-0.029	0.0221	0.1908	Other diseases of urinary system || id:finn-b-N14_URINOTH	0.05894	finn-b-N14_URINOTH
rs73592673	A	T	-0.0144	0.0156	0.358	Other diseases of urinary system || id:finn-b-N14_URINOTH	0.1329	finn-b-N14_URINOTH
rs11961899	G	A	-0.0135	0.0116	0.2463	Other diseases of urinary system || id:finn-b-N14_URINOTH	0.2788	finn-b-N14_URINOTH
rs9389266	T	G	0.0057	0.0137	0.6775	Other diseases of urinary system || id:finn-b-N14_URINOTH	0.1752	finn-b-N14_URINOTH
rs73130967	A	T	-0.01	0.0188	0.596499	Other diseases of urinary system || id:finn-b-N14_URINOTH	0.08414	finn-b-N14_URINOTH
rs1135612	G	A	0.0054	0.0128	0.672699	Other diseases of urinary system || id:finn-b-N14_URINOTH	0.211	finn-b-N14_URINOTH
rs2952251	G	A	-0.0176	0.0136	0.1931	Other diseases of urinary system || id:finn-b-N14_URINOTH	0.7713	finn-b-N14_URINOTH
rs4506202	G	A	0.0123	0.0105	0.2436	Other diseases of urinary system || id:finn-b-N14_URINOTH	0.4685	finn-b-N14_URINOTH
rs36081916	T	C	0.0195	0.0186	0.2953	Other diseases of urinary system || id:finn-b-N14_URINOTH	0.08935	finn-b-N14_URINOTH
rs2523124	C	T	0.0219	0.0106	0.0397997	Other diseases of urinary system || id:finn-b-N14_URINOTH	0.5987	finn-b-N14_URINOTH
rs11776390	T	C	0.0073	0.021	0.730099	Other diseases of urinary system || id:finn-b-N14_URINOTH	0.0665	finn-b-N14_URINOTH
rs3812426	A	G	0.0107	0.0144	0.4578	Other diseases of urinary system || id:finn-b-N14_URINOTH	0.8446	finn-b-N14_URINOTH
rs2136103	T	C	0.0026	0.0118	0.8286	Other diseases of urinary system || id:finn-b-N14_URINOTH	0.2665	finn-b-N14_URINOTH
rs11992182	A	C	0.0086	0.0125	0.4932	Other diseases of urinary system || id:finn-b-N14_URINOTH	0.2226	finn-b-N14_URINOTH
rs11779863	G	A	0.0067	0.0143	0.640801	Other diseases of urinary system || id:finn-b-N14_URINOTH	0.1596	finn-b-N14_URINOTH
rs28418786	C	G	0.0156	0.0168	0.3533	Other diseases of urinary system || id:finn-b-N14_URINOTH	0.11	finn-b-N14_URINOTH
rs12554342	G	C	0.0092	0.0128	0.4699	Other diseases of urinary system || id:finn-b-N14_URINOTH	0.2116	finn-b-N14_URINOTH
rs112135816	T	G	-0.0119	0.0219	0.5868	Other diseases of urinary system || id:finn-b-N14_URINOTH	0.06086	finn-b-N14_URINOTH
rs10217435	C	T	-0.0026	0.015	0.8608	Other diseases of urinary system || id:finn-b-N14_URINOTH	0.1404	finn-b-N14_URINOTH
rs10904722	C	T	0.0126	0.0122	0.3024	Other diseases of urinary system || id:finn-b-N14_URINOTH	0.2386	finn-b-N14_URINOTH
rs2724813	G	A	0.0058	0.0123	0.6375	Other diseases of urinary system || id:finn-b-N14_URINOTH	0.7637	finn-b-N14_URINOTH
rs16936671	C	T	0.0545	0.0151	0.000312903	Other diseases of urinary system || id:finn-b-N14_URINOTH	0.1387	finn-b-N14_URINOTH
rs11146701	A	G	0.0074	0.0139	0.5939	Other diseases of urinary system || id:finn-b-N14_URINOTH	0.3434	finn-b-N14_URINOTH
rs2229917	A	G	0.0037	0.026	0.8855	Other diseases of urinary system || id:finn-b-N14_URINOTH	0.04221	finn-b-N14_URINOTH
rs62575403	C	T	-0.007	0.0264	0.7895	Other diseases of urinary system || id:finn-b-N14_URINOTH	0.04228	finn-b-N14_URINOTH
rs3025411	A	G	0.0027	0.0171	0.876	Other diseases of urinary system || id:finn-b-N14_URINOTH	0.1066	finn-b-N14_URINOTH
rs12684609	T	C	-0.0025	0.0131	0.8497	Other diseases of urinary system || id:finn-b-N14_URINOTH	0.1973	finn-b-N14_URINOTH
rs12781711	C	T	-0.0121	0.012	0.3152	Other diseases of urinary system || id:finn-b-N14_URINOTH	0.2498	finn-b-N14_URINOTH
rs72776570	C	A	0.0484	0.0176	0.00603101	Other diseases of urinary system || id:finn-b-N14_URINOTH	0.09754	finn-b-N14_URINOTH
rs11252894	A	C	0.0027	0.0123	0.8266	Other diseases of urinary system || id:finn-b-N14_URINOTH	0.241	finn-b-N14_URINOTH
rs11597285	G	T	-0.0001	0.0107	0.9947	Other diseases of urinary system || id:finn-b-N14_URINOTH	0.3991	finn-b-N14_URINOTH
rs11599763	C	T	0.0053	0.0107	0.6181	Other diseases of urinary system || id:finn-b-N14_URINOTH	0.5923	finn-b-N14_URINOTH
rs4748237	G	C	0.0149	0.0105	0.1577	Other diseases of urinary system || id:finn-b-N14_URINOTH	0.4355	finn-b-N14_URINOTH
rs16918863	A	C	-0.0119	0.0214	0.578599	Other diseases of urinary system || id:finn-b-N14_URINOTH	0.06328	finn-b-N14_URINOTH
rs2047242	A	G	0.0132	0.0124	0.2897	Other diseases of urinary system || id:finn-b-N14_URINOTH	0.2308	finn-b-N14_URINOTH
rs892686	A	G	-0.0016	0.0105	0.8782	Other diseases of urinary system || id:finn-b-N14_URINOTH	0.4728	finn-b-N14_URINOTH
rs622418	A	G	0.0091	0.0104	0.3809	Other diseases of urinary system || id:finn-b-N14_URINOTH	0.4881	finn-b-N14_URINOTH
rs78909003	T	C	0.0126	0.0231	0.583899	Other diseases of urinary system || id:finn-b-N14_URINOTH	0.05484	finn-b-N14_URINOTH
rs2900503	T	G	0.0074	0.0142	0.6002	Other diseases of urinary system || id:finn-b-N14_URINOTH	0.8375	finn-b-N14_URINOTH
rs10448310	A	G	-0.0046	0.0109	0.669599	Other diseases of urinary system || id:finn-b-N14_URINOTH	0.3607	finn-b-N14_URINOTH
rs62422654	C	T	0.0045	0.0129	0.7251	Other diseases of urinary system || id:finn-b-N14_URINOTH	0.2081	finn-b-N14_URINOTH
rs4576377	C	A	-0.0171	0.0108	0.1153	Other diseases of urinary system || id:finn-b-N14_URINOTH	0.633	finn-b-N14_URINOTH
rs10263623	C	T	-0.0303	0.027	0.2608	Other diseases of urinary system || id:finn-b-N14_URINOTH	0.03911	finn-b-N14_URINOTH
rs4717843	G	T	0.0092	0.0105	0.3808	Other diseases of urinary system || id:finn-b-N14_URINOTH	0.4732	finn-b-N14_URINOTH
rs2464826	A	C	-0.0074	0.0165	0.653301	Other diseases of urinary system || id:finn-b-N14_URINOTH	0.113	finn-b-N14_URINOTH
rs2051957	C	T	-0.0129	0.0131	0.3255	Other diseases of urinary system || id:finn-b-N14_URINOTH	0.2001	finn-b-N14_URINOTH
rs17159861	C	T	-0.0156	0.017	0.3576	Other diseases of urinary system || id:finn-b-N14_URINOTH	0.1074	finn-b-N14_URINOTH
rs2267739	G	C	-0.0225	0.0166	0.1761	Other diseases of urinary system || id:finn-b-N14_URINOTH	0.1178	finn-b-N14_URINOTH
rs34928225	T	C	0.0032	0.018	0.8584	Other diseases of urinary system || id:finn-b-N14_URINOTH	0.09295	finn-b-N14_URINOTH
rs1007475	G	T	-0.0209	0.0117	0.0741293	Other diseases of urinary system || id:finn-b-N14_URINOTH	0.2769	finn-b-N14_URINOTH
rs11155559	T	C	0.0185	0.018	0.3058	Other diseases of urinary system || id:finn-b-N14_URINOTH	0.09179	finn-b-N14_URINOTH
rs10248854	C	A	-0.0062	0.0107	0.5576	Other diseases of urinary system || id:finn-b-N14_URINOTH	0.3967	finn-b-N14_URINOTH
rs117347059	G	C	-0.0084	0.0134	0.5312	Other diseases of urinary system || id:finn-b-N14_URINOTH	0.1877	finn-b-N14_URINOTH
rs41816	A	G	0.0187	0.0114	0.101	Other diseases of urinary system || id:finn-b-N14_URINOTH	0.301	finn-b-N14_URINOTH
rs13307134	T	C	-0.0032	0.014	0.822	Other diseases of urinary system || id:finn-b-N14_URINOTH	0.8333	finn-b-N14_URINOTH
rs13242616	C	T	-0.005	0.0113	0.6566	Other diseases of urinary system || id:finn-b-N14_URINOTH	0.6751	finn-b-N14_URINOTH
rs10995816	C	G	0.0042	0.0166	0.802	Other diseases of urinary system || id:finn-b-N14_URINOTH	0.113	finn-b-N14_URINOTH
rs11001941	G	A	-0.0192	0.0185	0.3006	Other diseases of urinary system || id:finn-b-N14_URINOTH	0.08719	finn-b-N14_URINOTH
rs853612	A	G	0.0022	0.0107	0.8345	Other diseases of urinary system || id:finn-b-N14_URINOTH	0.3955	finn-b-N14_URINOTH
rs10787984	G	C	-0.0128	0.0173	0.4586	Other diseases of urinary system || id:finn-b-N14_URINOTH	0.1022	finn-b-N14_URINOTH
rs112617308	T	C	0.0196	0.0181	0.2783	Other diseases of urinary system || id:finn-b-N14_URINOTH	0.0925	finn-b-N14_URINOTH
rs10762312	A	G	-0.0124	0.0113	0.2707	Other diseases of urinary system || id:finn-b-N14_URINOTH	0.6896	finn-b-N14_URINOTH
rs4463806	C	T	0.0296	0.0133	0.0262803	Other diseases of urinary system || id:finn-b-N14_URINOTH	0.808	finn-b-N14_URINOTH
rs78609301	A	G	-0.0115	0.0114	0.3133	Other diseases of urinary system || id:finn-b-N14_URINOTH	0.3008	finn-b-N14_URINOTH
rs9345899	A	G	0.0057	0.017	0.738901	Other diseases of urinary system || id:finn-b-N14_URINOTH	0.1048	finn-b-N14_URINOTH
rs13179700	C	T	-0.006	0.011	0.5854	Other diseases of urinary system || id:finn-b-N14_URINOTH	0.6562	finn-b-N14_URINOTH
rs1643968	T	C	0.0004	0.0109	0.9736	Other diseases of urinary system || id:finn-b-N14_URINOTH	0.358	finn-b-N14_URINOTH
rs2444793	T	C	-0.003	0.0107	0.780301	Other diseases of urinary system || id:finn-b-N14_URINOTH	0.6131	finn-b-N14_URINOTH
rs113147300	A	G	-0.0095	0.0152	0.531001	Other diseases of urinary system || id:finn-b-N14_URINOTH	0.137	finn-b-N14_URINOTH
rs7034891	G	C	0.015	0.0107	0.1593	Other diseases of urinary system || id:finn-b-N14_URINOTH	0.599	finn-b-N14_URINOTH
rs16938435	T	C	-0.0065	0.0176	0.710901	Other diseases of urinary system || id:finn-b-N14_URINOTH	0.09652	finn-b-N14_URINOTH
rs602075	G	A	-0.0146	0.0118	0.2188	Other diseases of urinary system || id:finn-b-N14_URINOTH	0.7366	finn-b-N14_URINOTH
rs1768152	C	T	0.0039	0.0171	0.8197	Other diseases of urinary system || id:finn-b-N14_URINOTH	0.8947	finn-b-N14_URINOTH
rs2366421	T	A	-0.0185	0.0136	0.1742	Other diseases of urinary system || id:finn-b-N14_URINOTH	0.1791	finn-b-N14_URINOTH
rs704418	C	T	0.0354	0.0158	0.0252802	Other diseases of urinary system || id:finn-b-N14_URINOTH	0.8684	finn-b-N14_URINOTH
rs4270579	A	G	0.0187	0.0112	0.0949205	Other diseases of urinary system || id:finn-b-N14_URINOTH	0.674	finn-b-N14_URINOTH
rs72684847	T	C	0.0117	0.0198	0.5532	Other diseases of urinary system || id:finn-b-N14_URINOTH	0.07492	finn-b-N14_URINOTH
rs72731813	C	T	0.0157	0.0244	0.519501	Other diseases of urinary system || id:finn-b-N14_URINOTH	0.04868	finn-b-N14_URINOTH
rs7675045	A	T	0.0093	0.0104	0.374	Other diseases of urinary system || id:finn-b-N14_URINOTH	0.4689	finn-b-N14_URINOTH
rs61090148	A	G	0.0026	0.0106	0.8055	Other diseases of urinary system || id:finn-b-N14_URINOTH	0.4316	finn-b-N14_URINOTH
rs2898979	G	C	-0.0148	0.0147	0.3135	Other diseases of urinary system || id:finn-b-N14_URINOTH	0.1486	finn-b-N14_URINOTH
rs17000015	A	T	0.0178	0.0117	0.1276	Other diseases of urinary system || id:finn-b-N14_URINOTH	0.2761	finn-b-N14_URINOTH
rs999857	G	A	0.0047	0.0119	0.692599	Other diseases of urinary system || id:finn-b-N14_URINOTH	0.2593	finn-b-N14_URINOTH
rs10461257	A	G	-0.0073	0.0111	0.510301	Other diseases of urinary system || id:finn-b-N14_URINOTH	0.3518	finn-b-N14_URINOTH
rs4388134	T	C	-0.0074	0.0117	0.5255	Other diseases of urinary system || id:finn-b-N14_URINOTH	0.7223	finn-b-N14_URINOTH
rs12638134	T	G	-0.0096	0.0106	0.3633	Other diseases of urinary system || id:finn-b-N14_URINOTH	0.4166	finn-b-N14_URINOTH
rs1553971	T	G	-0.0034	0.0126	0.784099	Other diseases of urinary system || id:finn-b-N14_URINOTH	0.2258	finn-b-N14_URINOTH
rs782080	A	T	-0.0017	0.0106	0.8715	Other diseases of urinary system || id:finn-b-N14_URINOTH	0.557	finn-b-N14_URINOTH
rs66710942	T	C	0.0081	0.0105	0.4358	Other diseases of urinary system || id:finn-b-N14_URINOTH	0.475	finn-b-N14_URINOTH
rs55876211	C	T	-0.0023	0.012	0.8446	Other diseases of urinary system || id:finn-b-N14_URINOTH	0.2545	finn-b-N14_URINOTH
rs13087692	G	T	0.0014	0.0114	0.9015	Other diseases of urinary system || id:finn-b-N14_URINOTH	0.7031	finn-b-N14_URINOTH
rs74540770	G	A	-0.0111	0.0192	0.5643	Other diseases of urinary system || id:finn-b-N14_URINOTH	0.08055	finn-b-N14_URINOTH
rs12485353	G	A	-0.0103	0.0121	0.3963	Other diseases of urinary system || id:finn-b-N14_URINOTH	0.2478	finn-b-N14_URINOTH
rs76001613	C	G	-0.0106	0.021	0.6142	Other diseases of urinary system || id:finn-b-N14_URINOTH	0.06823	finn-b-N14_URINOTH
rs7693984	G	A	0.0658	0.0254	0.00953608	Other diseases of urinary system || id:finn-b-N14_URINOTH	0.04436	finn-b-N14_URINOTH
rs10937802	A	G	0.0025	0.0161	0.8758	Other diseases of urinary system || id:finn-b-N14_URINOTH	0.8797	finn-b-N14_URINOTH
rs13105690	C	T	0.01	0.0116	0.3907	Other diseases of urinary system || id:finn-b-N14_URINOTH	0.7146	finn-b-N14_URINOTH
rs78399089	T	C	-0.0132	0.0164	0.4226	Other diseases of urinary system || id:finn-b-N14_URINOTH	0.1148	finn-b-N14_URINOTH
rs7629954	A	G	-0.0309	0.0253	0.2208	Other diseases of urinary system || id:finn-b-N14_URINOTH	0.04534	finn-b-N14_URINOTH
rs76193507	A	G	0.0192	0.0186	0.3007	Other diseases of urinary system || id:finn-b-N14_URINOTH	0.08563	finn-b-N14_URINOTH
rs62285697	C	T	-0.0123	0.0121	0.3086	Other diseases of urinary system || id:finn-b-N14_URINOTH	0.2535	finn-b-N14_URINOTH
rs76973485	G	T	-0.0184	0.0265	0.489	Other diseases of urinary system || id:finn-b-N14_URINOTH	0.04054	finn-b-N14_URINOTH
rs62240188	G	A	0.0037	0.018	0.8391	Other diseases of urinary system || id:finn-b-N14_URINOTH	0.09361	finn-b-N14_URINOTH
rs9837139	A	G	0.0017	0.0188	0.9295	Other diseases of urinary system || id:finn-b-N14_URINOTH	0.08478	finn-b-N14_URINOTH
rs6809952	G	A	-0.0043	0.0119	0.716699	Other diseases of urinary system || id:finn-b-N14_URINOTH	0.2782	finn-b-N14_URINOTH
rs76717940	T	A	0.0029	0.0228	0.8996	Other diseases of urinary system || id:finn-b-N14_URINOTH	0.05626	finn-b-N14_URINOTH
rs9873555	G	C	-0.0034	0.0163	0.8333	Other diseases of urinary system || id:finn-b-N14_URINOTH	0.1159	finn-b-N14_URINOTH
rs2300774	A	G	0.012	0.0105	0.2513	Other diseases of urinary system || id:finn-b-N14_URINOTH	0.5611	finn-b-N14_URINOTH
rs71314086	G	A	-0.0051	0.0199	0.7957	Other diseases of urinary system || id:finn-b-N14_URINOTH	0.07663	finn-b-N14_URINOTH
rs13100746	C	T	0.0026	0.0105	0.8036	Other diseases of urinary system || id:finn-b-N14_URINOTH	0.444	finn-b-N14_URINOTH
rs77478751	A	G	0.007	0.0163	0.668299	Other diseases of urinary system || id:finn-b-N14_URINOTH	0.1192	finn-b-N14_URINOTH
rs66746423	C	T	0.0284	0.0145	0.0503501	Other diseases of urinary system || id:finn-b-N14_URINOTH	0.1518	finn-b-N14_URINOTH
rs9887954	G	A	0.0078	0.0106	0.462701	Other diseases of urinary system || id:finn-b-N14_URINOTH	0.4092	finn-b-N14_URINOTH
rs2050911	G	A	0.006	0.011	0.5888	Other diseases of urinary system || id:finn-b-N14_URINOTH	0.3379	finn-b-N14_URINOTH
rs16843578	C	T	-0.0144	0.0234	0.539	Other diseases of urinary system || id:finn-b-N14_URINOTH	0.05301	finn-b-N14_URINOTH
rs1926302	G	A	0.0104	0.0126	0.4065	Other diseases of urinary system || id:finn-b-N14_URINOTH	0.2255	finn-b-N14_URINOTH
rs3980709	A	T	0.0114	0.0137	0.4069	Other diseases of urinary system || id:finn-b-N14_URINOTH	0.1751	finn-b-N14_URINOTH
rs7880204	T	C	-0.0187	0.0121	0.1224	Other diseases of urinary system || id:finn-b-N14_URINOTH	0.2458	finn-b-N14_URINOTH
rs1582238	C	T	0.0058	0.0109	0.5946	Other diseases of urinary system || id:finn-b-N14_URINOTH	0.6408	finn-b-N14_URINOTH
rs6588624	A	G	-0.0176	0.0105	0.09166	Other diseases of urinary system || id:finn-b-N14_URINOTH	0.4828	finn-b-N14_URINOTH
rs74101919	T	C	-0.001	0.0168	0.9537	Other diseases of urinary system || id:finn-b-N14_URINOTH	0.1084	finn-b-N14_URINOTH
rs290833	T	G	0.0012	0.0105	0.9097	Other diseases of urinary system || id:finn-b-N14_URINOTH	0.493	finn-b-N14_URINOTH
rs6656807	G	A	0.004	0.0108	0.712801	Other diseases of urinary system || id:finn-b-N14_URINOTH	0.6113	finn-b-N14_URINOTH
rs73191479	C	T	0.0036	0.0171	0.8343	Other diseases of urinary system || id:finn-b-N14_URINOTH	0.1038	finn-b-N14_URINOTH
rs12710729	C	A	0.0054	0.0112	0.631801	Other diseases of urinary system || id:finn-b-N14_URINOTH	0.3217	finn-b-N14_URINOTH
rs13411045	T	C	0.0285	0.0151	0.0598301	Other diseases of urinary system || id:finn-b-N14_URINOTH	0.1409	finn-b-N14_URINOTH
rs9425984	T	C	0.0032	0.0126	0.8008	Other diseases of urinary system || id:finn-b-N14_URINOTH	0.2182	finn-b-N14_URINOTH
rs1809136	C	G	-0.0334	0.0192	0.0819898	Other diseases of urinary system || id:finn-b-N14_URINOTH	0.9184	finn-b-N14_URINOTH
rs934049	G	A	-0.018	0.0129	0.1623	Other diseases of urinary system || id:finn-b-N14_URINOTH	0.2114	finn-b-N14_URINOTH
rs10166469	C	T	0.007	0.012	0.560101	Other diseases of urinary system || id:finn-b-N14_URINOTH	0.7463	finn-b-N14_URINOTH
rs12989336	G	A	-0.0202	0.0116	0.0826799	Other diseases of urinary system || id:finn-b-N14_URINOTH	0.28	finn-b-N14_URINOTH
rs6726833	C	A	-0.0156	0.0194	0.4206	Other diseases of urinary system || id:finn-b-N14_URINOTH	0.07854	finn-b-N14_URINOTH
rs4669806	G	T	0.0021	0.0127	0.8677	Other diseases of urinary system || id:finn-b-N14_URINOTH	0.214	finn-b-N14_URINOTH
rs55922055	T	C	0.0523	0.03	0.0811092	Other diseases of urinary system || id:finn-b-N14_URINOTH	0.03152	finn-b-N14_URINOTH
rs1563175	A	C	-0.0143	0.0105	0.172	Other diseases of urinary system || id:finn-b-N14_URINOTH	0.4578	finn-b-N14_URINOTH
rs112205261	T	C	0.0006	0.0191	0.9735	Other diseases of urinary system || id:finn-b-N14_URINOTH	0.08152	finn-b-N14_URINOTH
rs11585893	A	G	0.0021	0.0123	0.8672	Other diseases of urinary system || id:finn-b-N14_URINOTH	0.247	finn-b-N14_URINOTH
rs6545794	A	G	-0.0181	0.0161	0.2602	Other diseases of urinary system || id:finn-b-N14_URINOTH	0.1199	finn-b-N14_URINOTH
rs10496759	G	C	-0.0074	0.0126	0.5539	Other diseases of urinary system || id:finn-b-N14_URINOTH	0.2212	finn-b-N14_URINOTH
rs1035588	A	G	-0.011	0.0108	0.3106	Other diseases of urinary system || id:finn-b-N14_URINOTH	0.3735	finn-b-N14_URINOTH
rs72874194	G	C	0.0097	0.0152	0.524901	Other diseases of urinary system || id:finn-b-N14_URINOTH	0.1407	finn-b-N14_URINOTH
rs4953394	G	T	0.0115	0.0105	0.2734	Other diseases of urinary system || id:finn-b-N14_URINOTH	0.5608	finn-b-N14_URINOTH
rs4567981	T	A	-0.0007	0.0105	0.9433	Other diseases of urinary system || id:finn-b-N14_URINOTH	0.5295	finn-b-N14_URINOTH
rs79895140	T	C	-0.0142	0.0167	0.3962	Other diseases of urinary system || id:finn-b-N14_URINOTH	0.1151	finn-b-N14_URINOTH
rs13421739	C	G	-0.0021	0.0206	0.9175	Other diseases of urinary system || id:finn-b-N14_URINOTH	0.06929	finn-b-N14_URINOTH
rs59805249	T	C	-0.0063	0.018	0.724599	Other diseases of urinary system || id:finn-b-N14_URINOTH	0.09346	finn-b-N14_URINOTH
rs13188803	T	A	0.0002	0.0117	0.9874	Other diseases of urinary system || id:finn-b-N14_URINOTH	0.2748	finn-b-N14_URINOTH
rs76779974	C	G	-0.0063	0.018	0.7279	Other diseases of urinary system || id:finn-b-N14_URINOTH	0.09252	finn-b-N14_URINOTH
rs76528319	G	T	0.019	0.019	0.3173	Other diseases of urinary system || id:finn-b-N14_URINOTH	0.08211	finn-b-N14_URINOTH
rs2116427	A	G	0.0032	0.012	0.7866	Other diseases of urinary system || id:finn-b-N14_URINOTH	0.2553	finn-b-N14_URINOTH
rs76860606	C	G	0.0173	0.0186	0.3506	Other diseases of urinary system || id:finn-b-N14_URINOTH	0.08759	finn-b-N14_URINOTH
rs12522021	T	A	-0.0036	0.0153	0.8163	Other diseases of urinary system || id:finn-b-N14_URINOTH	0.1357	finn-b-N14_URINOTH
rs57646748	G	A	0.0276	0.0269	0.3058	Other diseases of urinary system || id:finn-b-N14_URINOTH	0.03864	finn-b-N14_URINOTH
rs2553290	A	T	0.0234	0.0147	0.1124	Other diseases of urinary system || id:finn-b-N14_URINOTH	0.1477	finn-b-N14_URINOTH
rs3821998	C	A	0.0093	0.017	0.5836	Other diseases of urinary system || id:finn-b-N14_URINOTH	0.1052	finn-b-N14_URINOTH
rs2199860	C	G	0.0017	0.0118	0.8882	Other diseases of urinary system || id:finn-b-N14_URINOTH	0.2619	finn-b-N14_URINOTH
rs73849225	T	C	0.0041	0.019	0.8294	Other diseases of urinary system || id:finn-b-N14_URINOTH	0.08221	finn-b-N14_URINOTH
rs74420793	A	G	-0.0056	0.017	0.744	Other diseases of urinary system || id:finn-b-N14_URINOTH	0.1043	finn-b-N14_URINOTH
rs72680320	T	C	0.0073	0.0111	0.5075	Other diseases of urinary system || id:finn-b-N14_URINOTH	0.336	finn-b-N14_URINOTH
rs74542928	T	C	0.0088	0.0244	0.7185	Other diseases of urinary system || id:finn-b-N14_URINOTH	0.04796	finn-b-N14_URINOTH
rs2892880	G	A	-0.0207	0.0121	0.0862502	Other diseases of urinary system || id:finn-b-N14_URINOTH	0.249	finn-b-N14_URINOTH
rs10000182	G	A	-0.006	0.0213	0.7791	Other diseases of urinary system || id:finn-b-N14_URINOTH	0.06487	finn-b-N14_URINOTH
rs4677103	A	G	0.0062	0.0138	0.654201	Other diseases of urinary system || id:finn-b-N14_URINOTH	0.1813	finn-b-N14_URINOTH
rs9852893	G	C	-0.005	0.0117	0.6691	Other diseases of urinary system || id:finn-b-N14_URINOTH	0.7101	finn-b-N14_URINOTH
rs989682	A	G	-0.0028	0.0124	0.8229	Other diseases of urinary system || id:finn-b-N14_URINOTH	0.2309	finn-b-N14_URINOTH
rs3828477	G	T	0.0017	0.011	0.874	Other diseases of urinary system || id:finn-b-N14_URINOTH	0.3439	finn-b-N14_URINOTH
rs75754569	C	G	0.0133	0.018	0.459701	Other diseases of urinary system || id:finn-b-N14_URINOTH	0.09266	finn-b-N14_URINOTH
rs4955932	T	C	-0.0137	0.0108	0.2059	Other diseases of urinary system || id:finn-b-N14_URINOTH	0.3876	finn-b-N14_URINOTH
rs430270	A	C	-0.0061	0.0134	0.6487	Other diseases of urinary system || id:finn-b-N14_URINOTH	0.1905	finn-b-N14_URINOTH
rs967319	T	C	0.0107	0.0122	0.3803	Other diseases of urinary system || id:finn-b-N14_URINOTH	0.2398	finn-b-N14_URINOTH
rs12634544	T	C	0.0221	0.0114	0.0522697	Other diseases of urinary system || id:finn-b-N14_URINOTH	0.2954	finn-b-N14_URINOTH
rs78155913	T	A	0.0104	0.0225	0.6445	Other diseases of urinary system || id:finn-b-N14_URINOTH	0.05693	finn-b-N14_URINOTH
rs75101789	C	T	0.0028	0.0185	0.8797	Other diseases of urinary system || id:finn-b-N14_URINOTH	0.08715	finn-b-N14_URINOTH
rs4490371	T	C	-0.0056	0.0107	0.6022	Other diseases of urinary system || id:finn-b-N14_URINOTH	0.413	finn-b-N14_URINOTH
rs2442778	A	G	-0.0411	0.0235	0.0800092	Other diseases of urinary system || id:finn-b-N14_URINOTH	0.9483	finn-b-N14_URINOTH
rs62191117	A	G	-0.0022	0.013	0.8654	Other diseases of urinary system || id:finn-b-N14_URINOTH	0.205	finn-b-N14_URINOTH
rs75416973	A	G	-0.0035	0.0126	0.781601	Other diseases of urinary system || id:finn-b-N14_URINOTH	0.2213	finn-b-N14_URINOTH
rs12724320	C	T	0.0168	0.0107	0.1171	Other diseases of urinary system || id:finn-b-N14_URINOTH	0.3824	finn-b-N14_URINOTH
rs12566975	T	C	-0.0177	0.0105	0.0909494	Other diseases of urinary system || id:finn-b-N14_URINOTH	0.4524	finn-b-N14_URINOTH
rs12404135	A	G	-0.0309	0.0196	0.1138	Other diseases of urinary system || id:finn-b-N14_URINOTH	0.07702	finn-b-N14_URINOTH
rs28479800	A	T	-0.0043	0.0169	0.7981	Other diseases of urinary system || id:finn-b-N14_URINOTH	0.888	finn-b-N14_URINOTH
rs4294381	C	T	-0.0194	0.0143	0.1732	Other diseases of urinary system || id:finn-b-N14_URINOTH	0.8425	finn-b-N14_URINOTH
rs12404911	C	T	-0.0257	0.0134	0.0561397	Other diseases of urinary system || id:finn-b-N14_URINOTH	0.1849	finn-b-N14_URINOTH
rs12046884	A	G	-0.0179	0.0185	0.3343	Other diseases of urinary system || id:finn-b-N14_URINOTH	0.08623	finn-b-N14_URINOTH
rs72640280	A	G	-0.0037	0.0228	0.8723	Other diseases of urinary system || id:finn-b-N14_URINOTH	0.05528	finn-b-N14_URINOTH
rs10803434	A	T	0.0054	0.0104	0.6075	Other diseases of urinary system || id:finn-b-N14_URINOTH	0.4744	finn-b-N14_URINOTH
rs7514702	T	C	-0.0005	0.0146	0.9742	Other diseases of urinary system || id:finn-b-N14_URINOTH	0.1506	finn-b-N14_URINOTH
rs2147798	G	C	-0.006	0.0121	0.6173	Other diseases of urinary system || id:finn-b-N14_URINOTH	0.7508	finn-b-N14_URINOTH
rs72714493	A	G	-0.0032	0.0146	0.8279	Other diseases of urinary system || id:finn-b-N14_URINOTH	0.1526	finn-b-N14_URINOTH
rs7546249	A	T	-0.0047	0.0114	0.6817	Other diseases of urinary system || id:finn-b-N14_URINOTH	0.7063	finn-b-N14_URINOTH
rs9729514	G	A	0.0027	0.018	0.8785	Other diseases of urinary system || id:finn-b-N14_URINOTH	0.9069	finn-b-N14_URINOTH
rs16851659	G	C	-0.0082	0.011	0.4555	Other diseases of urinary system || id:finn-b-N14_URINOTH	0.3405	finn-b-N14_URINOTH
rs74592222	G	A	-0.0074	0.0164	0.6507	Other diseases of urinary system || id:finn-b-N14_URINOTH	0.1157	finn-b-N14_URINOTH
rs35414597	T	A	-0.0056	0.0114	0.626299	Other diseases of urinary system || id:finn-b-N14_URINOTH	0.297	finn-b-N14_URINOTH
rs4697572	A	G	0.0239	0.0131	0.0681506	Other diseases of urinary system || id:finn-b-N14_URINOTH	0.1993	finn-b-N14_URINOTH
rs10028567	C	T	-0.0277	0.016	0.0838108	Other diseases of urinary system || id:finn-b-N14_URINOTH	0.1207	finn-b-N14_URINOTH
rs80330081	A	C	0.0006	0.0171	0.97	Other diseases of urinary system || id:finn-b-N14_URINOTH	0.1045	finn-b-N14_URINOTH
rs1962325	G	C	-0.0014	0.011	0.8995	Other diseases of urinary system || id:finn-b-N14_URINOTH	0.6628	finn-b-N14_URINOTH
rs2371284	C	T	0.0193	0.0125	0.1227	Other diseases of urinary system || id:finn-b-N14_URINOTH	0.7678	finn-b-N14_URINOTH
rs7975768	C	G	0.0143	0.0105	0.1746	Other diseases of urinary system || id:finn-b-N14_URINOTH	0.5007	finn-b-N14_URINOTH
rs11110281	T	C	0.0057	0.0243	0.8136	Other diseases of urinary system || id:finn-b-N14_URINOTH	0.04808	finn-b-N14_URINOTH
rs11110282	A	G	0.0049	0.0243	0.8407	Other diseases of urinary system || id:finn-b-N14_URINOTH	0.04812	finn-b-N14_URINOTH
rs7298818	C	T	0.0116	0.0172	0.500299	Other diseases of urinary system || id:finn-b-N14_URINOTH	0.1013	finn-b-N14_URINOTH
rs10791168	G	A	-0.0016	0.0136	0.9084	Other diseases of urinary system || id:finn-b-N14_URINOTH	0.8152	finn-b-N14_URINOTH
rs2286384	C	G	0.0117	0.0104	0.2608	Other diseases of urinary system || id:finn-b-N14_URINOTH	0.4938	finn-b-N14_URINOTH
rs7137760	C	T	-0.0065	0.0105	0.5383	Other diseases of urinary system || id:finn-b-N14_URINOTH	0.4614	finn-b-N14_URINOTH
rs117151453	G	C	0.007	0.0167	0.6774	Other diseases of urinary system || id:finn-b-N14_URINOTH	0.11	finn-b-N14_URINOTH
rs3862635	C	T	0.0058	0.0181	0.7486	Other diseases of urinary system || id:finn-b-N14_URINOTH	0.09085	finn-b-N14_URINOTH
rs2098844	T	C	0.0254	0.0108	0.0192801	Other diseases of urinary system || id:finn-b-N14_URINOTH	0.6211	finn-b-N14_URINOTH
rs61898819	A	T	-0.0095	0.0133	0.4749	Other diseases of urinary system || id:finn-b-N14_URINOTH	0.1911	finn-b-N14_URINOTH
rs7294633	T	C	-0.0207	0.0118	0.0781394	Other diseases of urinary system || id:finn-b-N14_URINOTH	0.7268	finn-b-N14_URINOTH
rs79113084	C	T	0.0035	0.0171	0.8403	Other diseases of urinary system || id:finn-b-N14_URINOTH	0.1081	finn-b-N14_URINOTH
rs61933850	G	A	0.011	0.0154	0.4774	Other diseases of urinary system || id:finn-b-N14_URINOTH	0.1388	finn-b-N14_URINOTH
rs191093	G	A	-0.0101	0.017	0.5528	Other diseases of urinary system || id:finn-b-N14_URINOTH	0.1085	finn-b-N14_URINOTH
rs1044939	C	T	-0.0405	0.0174	0.0199802	Other diseases of urinary system || id:finn-b-N14_URINOTH	0.09955	finn-b-N14_URINOTH
rs34449434	A	C	0.0031	0.011	0.7802	Other diseases of urinary system || id:finn-b-N14_URINOTH	0.3923	finn-b-N14_URINOTH
rs137917150	T	A	0.0173	0.018	0.3344	Other diseases of urinary system || id:finn-b-N14_URINOTH	0.09457	finn-b-N14_URINOTH
rs1918540	A	G	0.0105	0.0135	0.4396	Other diseases of urinary system || id:finn-b-N14_URINOTH	0.8135	finn-b-N14_URINOTH
rs1154904	G	A	0.0021	0.0104	0.8391	Other diseases of urinary system || id:finn-b-N14_URINOTH	0.5071	finn-b-N14_URINOTH
rs11022995	A	G	0.0011	0.0105	0.9184	Other diseases of urinary system || id:finn-b-N14_URINOTH	0.5152	finn-b-N14_URINOTH
rs16950051	A	G	-0.0122	0.0212	0.566601	Other diseases of urinary system || id:finn-b-N14_URINOTH	0.06551	finn-b-N14_URINOTH
rs1000888	C	G	-0.0043	0.0111	0.7002	Other diseases of urinary system || id:finn-b-N14_URINOTH	0.335	finn-b-N14_URINOTH
rs145020347	A	G	-0.0252	0.0149	0.0904003	Other diseases of urinary system || id:finn-b-N14_URINOTH	0.1481	finn-b-N14_URINOTH
rs58236560	G	T	0.0218	0.016	0.1738	Other diseases of urinary system || id:finn-b-N14_URINOTH	0.1206	finn-b-N14_URINOTH
rs79263163	A	C	-0.0321	0.013	0.01355	Other diseases of urinary system || id:finn-b-N14_URINOTH	0.2002	finn-b-N14_URINOTH
rs77193512	A	G	-0.0072	0.0121	0.5501	Other diseases of urinary system || id:finn-b-N14_URINOTH	0.2478	finn-b-N14_URINOTH
rs2114677	C	T	0.001	0.0163	0.9498	Other diseases of urinary system || id:finn-b-N14_URINOTH	0.1162	finn-b-N14_URINOTH
rs4756632	G	T	0.0018	0.0155	0.9074	Other diseases of urinary system || id:finn-b-N14_URINOTH	0.1294	finn-b-N14_URINOTH
rs61884471	G	A	0.0137	0.0168	0.4157	Other diseases of urinary system || id:finn-b-N14_URINOTH	0.109	finn-b-N14_URINOTH
rs10892421	T	C	0.0066	0.0105	0.5281	Other diseases of urinary system || id:finn-b-N14_URINOTH	0.5608	finn-b-N14_URINOTH
rs17582787	A	G	0.0422	0.014	0.00261198	Other diseases of urinary system || id:finn-b-N14_URINOTH	0.165	finn-b-N14_URINOTH
rs75672793	A	G	0.0234	0.0248	0.3458	Other diseases of urinary system || id:finn-b-N14_URINOTH	0.04593	finn-b-N14_URINOTH
rs17804233	C	T	0.0073	0.0105	0.4861	Other diseases of urinary system || id:finn-b-N14_URINOTH	0.5264	finn-b-N14_URINOTH
rs35509	G	A	-0.0199	0.026	0.4437	Other diseases of urinary system || id:finn-b-N14_URINOTH	0.04264	finn-b-N14_URINOTH
rs133832	A	C	-0.0085	0.0116	0.4665	Other diseases of urinary system || id:finn-b-N14_URINOTH	0.2826	finn-b-N14_URINOTH
rs7193624	T	C	0.0055	0.0189	0.7701	Other diseases of urinary system || id:finn-b-N14_URINOTH	0.9167	finn-b-N14_URINOTH
rs35555519	C	G	-0.0171	0.0176	0.33	Other diseases of urinary system || id:finn-b-N14_URINOTH	0.09818	finn-b-N14_URINOTH
rs7499539	A	G	0.0006	0.0118	0.9586	Other diseases of urinary system || id:finn-b-N14_URINOTH	0.262	finn-b-N14_URINOTH
rs8053158	G	A	0.0142	0.0162	0.3788	Other diseases of urinary system || id:finn-b-N14_URINOTH	0.8781	finn-b-N14_URINOTH
rs60983350	G	A	0.0149	0.0113	0.1855	Other diseases of urinary system || id:finn-b-N14_URINOTH	0.3609	finn-b-N14_URINOTH
rs356049	G	A	-0.0174	0.021	0.4087	Other diseases of urinary system || id:finn-b-N14_URINOTH	0.06909	finn-b-N14_URINOTH
rs11876297	T	C	-0.0007	0.0118	0.9517	Other diseases of urinary system || id:finn-b-N14_URINOTH	0.2838	finn-b-N14_URINOTH
rs17067076	G	A	-0.0036	0.0164	0.8282	Other diseases of urinary system || id:finn-b-N14_URINOTH	0.1153	finn-b-N14_URINOTH
rs12458763	A	C	0.0133	0.0252	0.595899	Other diseases of urinary system || id:finn-b-N14_URINOTH	0.04503	finn-b-N14_URINOTH
rs7249113	G	A	0.0117	0.0114	0.3053	Other diseases of urinary system || id:finn-b-N14_URINOTH	0.2988	finn-b-N14_URINOTH
rs8100692	T	C	0.0187	0.0105	0.0747205	Other diseases of urinary system || id:finn-b-N14_URINOTH	0.558	finn-b-N14_URINOTH
rs77356209	T	C	0.0339	0.025	0.1744	Other diseases of urinary system || id:finn-b-N14_URINOTH	0.04596	finn-b-N14_URINOTH
rs7314815	G	A	0.0043	0.0105	0.681201	Other diseases of urinary system || id:finn-b-N14_URINOTH	0.5517	finn-b-N14_URINOTH
rs75768969	C	G	0.0005	0.0188	0.9802	Other diseases of urinary system || id:finn-b-N14_URINOTH	0.08465	finn-b-N14_URINOTH
rs111862613	T	C	-0.0059	0.014	0.6728	Other diseases of urinary system || id:finn-b-N14_URINOTH	0.1778	finn-b-N14_URINOTH
rs9567264	C	T	0.0114	0.011	0.3005	Other diseases of urinary system || id:finn-b-N14_URINOTH	0.3355	finn-b-N14_URINOTH
rs12863463	G	A	0.0064	0.0195	0.7431	Other diseases of urinary system || id:finn-b-N14_URINOTH	0.07794	finn-b-N14_URINOTH
rs1403396	A	T	0.0124	0.0127	0.3281	Other diseases of urinary system || id:finn-b-N14_URINOTH	0.2175	finn-b-N14_URINOTH
rs2273429	A	G	0.0031	0.0171	0.858	Other diseases of urinary system || id:finn-b-N14_URINOTH	0.1045	finn-b-N14_URINOTH
rs7982713	G	A	0.0067	0.0117	0.567599	Other diseases of urinary system || id:finn-b-N14_URINOTH	0.2833	finn-b-N14_URINOTH
rs9573937	A	G	-0.0078	0.0141	0.5814	Other diseases of urinary system || id:finn-b-N14_URINOTH	0.1647	finn-b-N14_URINOTH
rs116500994	G	T	-0.0606	0.0245	0.0135301	Other diseases of urinary system || id:finn-b-N14_URINOTH	0.04746	finn-b-N14_URINOTH
rs386526	G	C	-0.0024	0.0103	0.8175	Other diseases of urinary system || id:finn-b-N14_URINOTH	0.5025	finn-b-N14_URINOTH
rs4962426	T	G	0.0162	0.0132	0.2226	Other diseases of urinary system || id:finn-b-N14_URINOTH	0.8046	finn-b-N14_URINOTH
rs79929882	A	G	0.0187	0.016	0.2417	Other diseases of urinary system || id:finn-b-N14_URINOTH	0.1249	finn-b-N14_URINOTH
rs10781552	C	T	-0.0063	0.0116	0.5883	Other diseases of urinary system || id:finn-b-N14_URINOTH	0.2807	finn-b-N14_URINOTH
rs11246212	C	T	0.0115	0.0151	0.4456	Other diseases of urinary system || id:finn-b-N14_URINOTH	0.8604	finn-b-N14_URINOTH
rs61265175	G	C	-0.0126	0.0135	0.3525	Other diseases of urinary system || id:finn-b-N14_URINOTH	0.1818	finn-b-N14_URINOTH
rs367480	A	G	-0.0163	0.0109	0.1347	Other diseases of urinary system || id:finn-b-N14_URINOTH	0.6415	finn-b-N14_URINOTH
rs35035870	T	C	0	0.027	0.9999	Other diseases of urinary system || id:finn-b-N14_URINOTH	0.03923	finn-b-N14_URINOTH
rs12797734	T	C	0.0127	0.0121	0.2949	Other diseases of urinary system || id:finn-b-N14_URINOTH	0.2621	finn-b-N14_URINOTH
rs58405430	G	T	-0.0221	0.0221	0.3169	Other diseases of urinary system || id:finn-b-N14_URINOTH	0.0599	finn-b-N14_URINOTH
rs1883097	C	T	-0.023	0.0273	0.4001	Other diseases of urinary system || id:finn-b-N14_URINOTH	0.03776	finn-b-N14_URINOTH
rs10840326	C	G	0.0059	0.0109	0.5848	Other diseases of urinary system || id:finn-b-N14_URINOTH	0.3681	finn-b-N14_URINOTH
rs7123615	C	G	-0.0221	0.0131	0.0921595	Other diseases of urinary system || id:finn-b-N14_URINOTH	0.1957	finn-b-N14_URINOTH
rs10502061	A	G	-0.0238	0.0164	0.1464	Other diseases of urinary system || id:finn-b-N14_URINOTH	0.1144	finn-b-N14_URINOTH
rs2704155	T	A	-0.1206	0.2664	0.6507	Other diseases of urinary system || id:finn-b-N14_URINOTH	0.0004293	finn-b-N14_URINOTH
rs7120052	A	C	-0.0007	0.0133	0.9608	Other diseases of urinary system || id:finn-b-N14_URINOTH	0.1887	finn-b-N14_URINOTH
rs28691777	C	T	-0.0073	0.0255	0.7742	Other diseases of urinary system || id:finn-b-N14_URINOTH	0.04342	finn-b-N14_URINOTH
rs72829893	G	T	-0.0201	0.0172	0.2419	Other diseases of urinary system || id:finn-b-N14_URINOTH	0.1028	finn-b-N14_URINOTH
rs4793307	C	T	-0.0122	0.0123	0.3219	Other diseases of urinary system || id:finn-b-N14_URINOTH	0.2395	finn-b-N14_URINOTH
rs79640386	T	A	0.0204	0.0155	0.1863	Other diseases of urinary system || id:finn-b-N14_URINOTH	0.1318	finn-b-N14_URINOTH
rs72783037	C	A	0.0167	0.0128	0.1935	Other diseases of urinary system || id:finn-b-N14_URINOTH	0.2064	finn-b-N14_URINOTH
rs7174549	T	C	-0.0105	0.0109	0.3357	Other diseases of urinary system || id:finn-b-N14_URINOTH	0.6414	finn-b-N14_URINOTH
rs35398954	A	G	0.0128	0.0143	0.3708	Other diseases of urinary system || id:finn-b-N14_URINOTH	0.1609	finn-b-N14_URINOTH
rs111745969	A	G	0.0039	0.0153	0.7982	Other diseases of urinary system || id:finn-b-N14_URINOTH	0.1362	finn-b-N14_URINOTH
rs62020470	A	G	0.0241	0.0136	0.0766708	Other diseases of urinary system || id:finn-b-N14_URINOTH	0.1796	finn-b-N14_URINOTH
rs34284163	A	T	0	0.0127	0.9995	Other diseases of urinary system || id:finn-b-N14_URINOTH	0.2155	finn-b-N14_URINOTH
rs7502686	G	C	0.0259	0.0217	0.2339	Other diseases of urinary system || id:finn-b-N14_URINOTH	0.06102	finn-b-N14_URINOTH
rs8076323	A	G	0.002	0.0111	0.8581	Other diseases of urinary system || id:finn-b-N14_URINOTH	0.3251	finn-b-N14_URINOTH
rs28376661	C	G	0.0094	0.0114	0.4073	Other diseases of urinary system || id:finn-b-N14_URINOTH	0.3014	finn-b-N14_URINOTH
rs542415	T	C	-0.0135	0.0107	0.2054	Other diseases of urinary system || id:finn-b-N14_URINOTH	0.3905	finn-b-N14_URINOTH
rs8028558	A	G	0.0107	0.0109	0.3255	Other diseases of urinary system || id:finn-b-N14_URINOTH	0.3582	finn-b-N14_URINOTH
rs35179274	C	T	-0.0016	0.0136	0.9082	Other diseases of urinary system || id:finn-b-N14_URINOTH	0.1789	finn-b-N14_URINOTH
rs8013541	A	T	-0.005	0.0105	0.6367	Other diseases of urinary system || id:finn-b-N14_URINOTH	0.4312	finn-b-N14_URINOTH
rs10140184	A	C	-0.0155	0.0107	0.1467	Other diseases of urinary system || id:finn-b-N14_URINOTH	0.4736	finn-b-N14_URINOTH
rs7155595	C	A	0.0051	0.0114	0.651499	Other diseases of urinary system || id:finn-b-N14_URINOTH	0.3017	finn-b-N14_URINOTH
rs7148504	T	G	-0.0024	0.0106	0.8234	Other diseases of urinary system || id:finn-b-N14_URINOTH	0.5997	finn-b-N14_URINOTH
rs17214486	C	A	-0.0078	0.0112	0.487401	Other diseases of urinary system || id:finn-b-N14_URINOTH	0.3235	finn-b-N14_URINOTH
rs6494922	A	G	-0.0195	0.0231	0.3974	Other diseases of urinary system || id:finn-b-N14_URINOTH	0.05399	finn-b-N14_URINOTH
rs77564310	A	C	0.0077	0.0129	0.5512	Other diseases of urinary system || id:finn-b-N14_URINOTH	0.2072	finn-b-N14_URINOTH
rs8006832	G	T	0.0025	0.0183	0.8896	Other diseases of urinary system || id:finn-b-N14_URINOTH	0.09195	finn-b-N14_URINOTH
rs74037001	G	A	-0.008	0.0184	0.663901	Other diseases of urinary system || id:finn-b-N14_URINOTH	0.08868	finn-b-N14_URINOTH
[truncated: 151 more rows]
